# Supplementary material for: Dynamic RNA–protein interactions underlie the zebrafish maternal-to-zygotic transition
Source: PubMed Central journal article supplement — Genome Res. 2017 Jul;27(7):1184–94. doi: 10.1101/gr.215954.116 (PMC5495070; doi:10.1101/gr.215954.116), 2017-07
Supplement: supp_gr.215954.116_Supplemental_Fig_S3.pdf [file supp_gr.215954.116_Supplemental_Fig_S3.pdf]

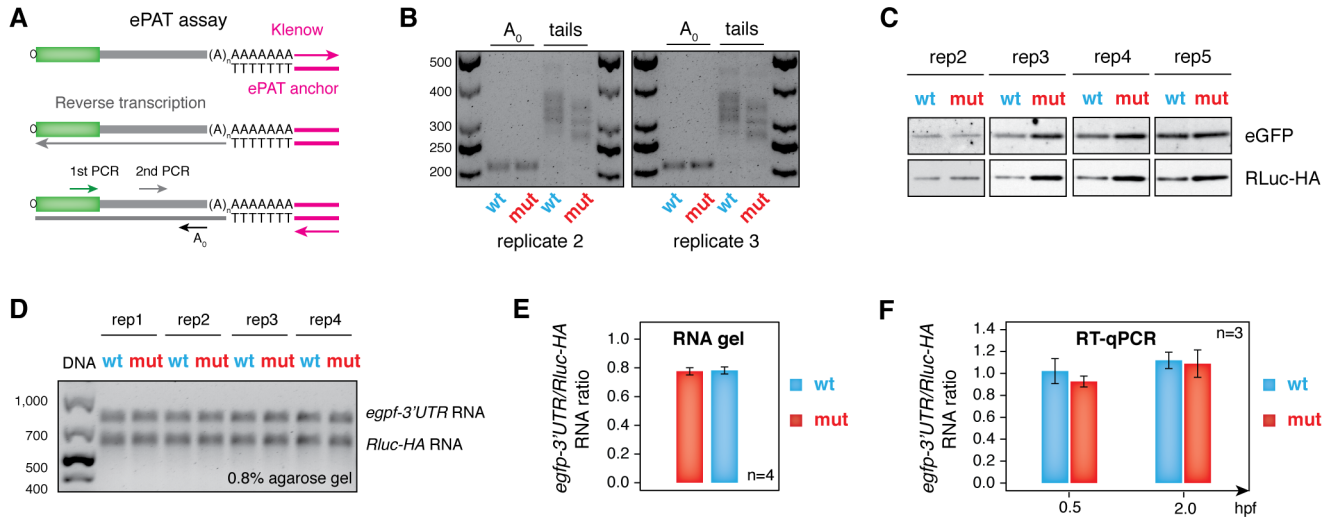

**Supplemental Figure S3 (related to Figure 2). ePAT, translational assay and mRNA reporter stabilities. (A)** Schematic representation of the ePAT (see Supplemental Methods). **(B)** 1.5% agarose gels showing additional two replicates of poly(A) tail length measurements for wt and mut mRNA reporters. **(C)** Western blots showing additional 4 replicates for mRNA reporter translational assay. **(D)** 0.8% agarose RNA gel showing pipetting accuracy of the preinjected RNA mixture (wt and mut *egfp-npc1* 3'UTR and *Rluc-HA*). **(E)** Quantification of band intensities from (A). Error bars represent S.E.M. (n=4). **(F)** RT-qPCR analysis of the mRNA reporter stabilities between 0.5 and 2 hours after injections. Stabilities of both wt and mut mRNA reporters were determined through calculation of the ratio between the reporter mRNA and *Rluc-HA* RNA levels at the indicated time points after injections. Note that no change in the ratio was observed. Error bars show S.E.M. (n=3).
