# Supplementary material for: Dynamic RNA–protein interactions underlie the zebrafish maternal-to-zygotic transition
Source: PubMed Central journal article supplement — Genome Res. 2017 Jul;27(7):1184–94. doi: 10.1101/gr.215954.116 (PMC5495070; doi:10.1101/gr.215954.116), 2017-07
Supplement: supp_gr.215954.116_Supplemental_Fig_S4.pdf [file supp_gr.215954.116_Supplemental_Fig_S4.pdf]

## Despic\_Supplemental\_Fig\_S4

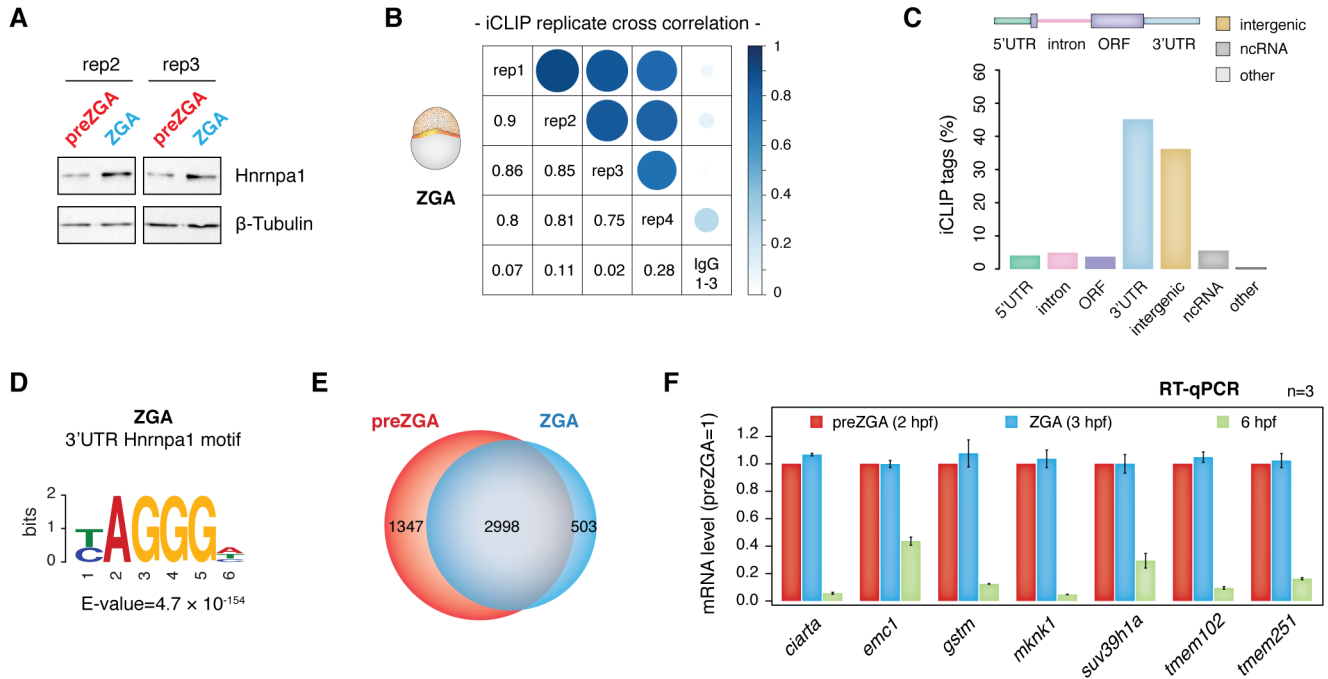

**Supplemental Figure S4 (related to Figure 4). Hnrnpa1 protein levels and ZGA Hnrnpa1 iCLIP statistics. (A)** Western blots showing changes in Hnrnpa1 protein levels between 2 and 3 hpf (two additional replicates from quantification displayed in Fig.4A). **(B)** Cross-correlation between ZGA Hnrnpa1 and summed IgG (control) iCLIP replicates. Pearson correlation coefficient is shown, color-coded and proportional to the size of the displayed circles. **(C)** Barplot showing relative distribution of Hnrnpa1 iCLIP tags in different genic and intergenic regions at the ZGA stage. Color of each bar corresponds to the annotation above the barplot. **(D)** Hexanucleotide Hnrnpa1 binding motif in 3'UTR at the ZGA stage resembles high affinity Hnrnpa1 SELEX consensus sequence. **(E)** Venn diagram showing the number of preZGA and ZGA Hnrnpa1 mRNA targets and their overlap. **(F)** RT-qPCR showing expression levels of decaying maternal mRNAs at 2, 3 and 6 hpf. mRNA level at 2 hpf was set to 1. Error bars represent S.E.M. (n=3).
