# Supplementary material for: Dynamic RNA–protein interactions underlie the zebrafish maternal-to-zygotic transition
Source: PubMed Central journal article supplement — Genome Res. 2017 Jul;27(7):1184–94. doi: 10.1101/gr.215954.116 (PMC5495070; doi:10.1101/gr.215954.116), 2017-07
Supplement: supp_gr.215954.116_Supplemental_Fig_S6.pdf [file supp_gr.215954.116_Supplemental_Fig_S6.pdf]

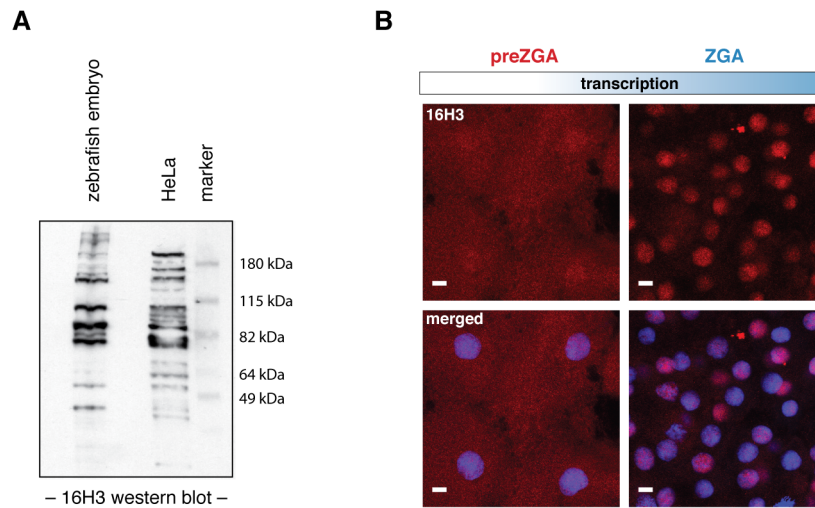

**Supplemental Figure S6 (related to Figure 4). Nuclear translocation of splicing factors during MZT. (A)** Western blot on the total protein extract from HeLa cells and ZGA stage zebrafish embryos. Note similar pattern of protein bands between human and zebrafish sample. **(B)** 16H3 immunostaining (red) shows nuclear concentration of splicing factors following the transcriptional onset from the zygotic genome. 16H3 antibody reacts with the epitope present on a large number of splicing factors, including four SR proteins and spliceosomal components (Neugebauer et al, 1995). Nuclei were stained with Hoechst (blue). preZGA, 64 cell stage. ZGA, 1K cell stage. Scale bars = 10  $\mu$ m.
