# Supplementary material for: Dynamic RNA–protein interactions underlie the zebrafish maternal-to-zygotic transition
Source: HighWire-hosted journal article supplement (doi:10.1101/gr.215954.116), 2017-04-05
Supplement: Supplemental_Tables_S1-6.xlsx [file Supplemental_Tables_S1-6.xlsx]

## Sheet: Contents
Despic_Supplemental_Tables_S1-6
Supplemental Table 1. Zebrafish preZGA and ZGA mRNA interactome raw datasets from triplicate samples
Supplemental Table 2A. List of preZGA UV + enriched protein groups with raw values from triplicate samples, FDR=0.01
Supplemental Table 2B. List of ZGA UV + enriched protein groups with raw values from triplicate samples, FDR=0.01
Supplemental Table 3. List of protein groups comprising the zebrafish MZT mRBPome and comparison with mammalian RBPs
Supplemental Table 4. Comparison of the zebrafish MZT and mammalian mRBPomes
Supplemental Table 5. PreZGA and ZGA iCLIP statistics
Supplemental Table 6. List of oligonucleotides

## Sheet: ST1_Raw mRNA interactome data
Supplemental Table S1. Zebrafish preZGA and ZGA mRNA interactome raw datasets from triplicate samples
# Label-free quantification (LFQ) protein intensities for each replicate sample of UV irradiiated (UV+) and non-irradiated (UV–) samples for preZGA and ZGA developmental stages are shown for each protein group. The number of identified peptides and amino acid sequence coverage for each of the identified protein group are indicated. The number of identified proteins and their respective names are …
								preZGA						ZGA
								UV +			UV –			UV +			UV –
Protein.IDs	Majority.protein.IDs	Gene.names	Fasta.headers	Number.of.proteins	Peptides	Sequence.coverage [%]	PEP	LFQ.intensity.rep1	LFQ.intensity.rep2	LFQ.intensity.rep3	LFQ.intensity.rep1	LFQ.intensity.rep2	LFQ.intensity.rep3	LFQ.intensity.rep1	LFQ.intensity.rep2	LFQ.intensity.rep3	LFQ.intensity.rep1	LFQ.intensity.rep2	LFQ.intensity.rep3
F1QFA6;A1A5H6;F1QAM0	F1QFA6;A1A5H6;F1QAM0	cnot1	>tr|F1QFA6|F1QFA6_DANRE CCR4-NOT transcription complex, subunit 1 OS=Danio rerio GN=cnot1 PE=4 SV=1;>sp|A1A5H6|CNOT1_DANRE CCR4-NOT transcription complex subunit 1 OS=Danio rerio GN=cnot1 PE=2 SV=1;>tr|F1QAM0|F1QAM0_DANRE CCR4-NOT transcription complex, su	3	7	3.7	1.7906e-18	NA	NA	NA	NA	NA	NA	NA	17705000	21591000	NA	NA	NA
A1A5X7;F1R0M4	A1A5X7	zgc:158363	>tr|A1A5X7|A1A5X7_DANRE Zgc:158363 OS=Danio rerio GN=zgc:158363 PE=2 SV=1	2	7	18.7	3.9323e-42	118390000	116910000	268310000	NA	NA	NA	268330000	306650000	365200000	NA	NA	NA
A1A605;F1RB19	A1A605;F1RB19	ybx1	>tr|A1A605|A1A605_DANRE Y box binding protein 1 OS=Danio rerio GN=ybx1 PE=2 SV=1;>tr|F1RB19|F1RB19_DANRE Y box-binding protein 1 OS=Danio rerio GN=ybx1 PE=4 SV=1	2	20	64.7	0	10340000000	11647000000	8170700000	39187000	70719000	NA	13097000000	10523000000	10121000000	NA	493290000	NA
A1L1U3;E9QCK9	A1L1U3;E9QCK9	g3bp2	>tr|A1L1U3|A1L1U3_DANRE GTPase activating protein (SH3 domain) binding protein 2 OS=Danio rerio GN=g3bp2 PE=2 SV=1;>tr|E9QCK9|E9QCK9_DANRE Uncharacterized protein OS=Danio rerio PE=4 SV=1	2	4	9.5	8.4275e-10	NA	NA	123530000	NA	NA	NA	NA	NA	NA	NA	NA	NA
Q8AW05;A2AWA1;Q803W0;Q7SXU7	Q8AW05;A2AWA1;Q803W0;Q7SXU7	ddx39aa;ddx39ab;ddx39b	>tr|Q8AW05|Q8AW05_DANRE DEAD (Asp-Glu-Ala-Asp) box polypeptide 39Aa OS=Danio rerio GN=ddx39a PE=2 SV=1;>tr|A2AWA1|A2AWA1_DANRE DEAD (Asp-Glu-Ala-Asp) box polypeptide 39Aa OS=Danio rerio GN=ddx39a PE=4 SV=1;>tr|Q803W0|Q803W0_DANRE DEAD (Asp-Glu-Ala-Asp) box	4	2	6.9	4.998e-05	NA	NA	NA	NA	NA	NA	NA	7799700	7736100	NA	NA	NA
A2BEG2	A2BEG2	trmt2a	>tr|A2BEG2|A2BEG2_DANRE Novel protein (Zgc:55519) OS=Danio rerio GN=trmt2a PE=4 SV=1	1	7	14.4	1.1554e-29	33471000	28352000	NA	NA	NA	NA	NA	NA	NA	NA	NA	NA
A2BFY7;E7F7D8;Q6JIZ2	A2BFY7	purba	>tr|A2BFY7|A2BFY7_DANRE Novel protein similar to vertebrate purine-rich element binding protein B (PURB) OS=Danio rerio GN=si:dkey-202n14.1 PE=2 SV=1	3	10	36.9	1.1307e-124	NA	NA	348460000	NA	NA	NA	429800000	529470000	278200000	NA	NA	NA
F1QUC9;E7EZB4;Q6PCR6;A2BGG2;F1QTM0;F1R4R8;F6PD25	F1QUC9;E7EZB4;Q6PCR6;A2BGG2	zfr	>tr|F1QUC9|F1QUC9_DANRE Zinc finger RNA-binding protein OS=Danio rerio GN=zfr PE=4 SV=1;>tr|E7EZB4|E7EZB4_DANRE Uncharacterized protein OS=Danio rerio GN=OTTDARG00000018565 PE=4 SV=1;>sp|Q6PCR6|ZFR_DANRE Zinc finger RNA-binding protein OS=Danio rerio GN=zf	7	3	8.8	2.8872e-14	NA	NA	NA	NA	NA	NA	NA	11609000	NA	NA	NA	NA
Q7T306;A2BHA3;B8JJ23;B8JJ24;Q8AY63;Q08BV6	Q7T306;A2BHA3;B8JJ23;B8JJ24;Q8AY63;Q08BV6	ckmb;ckma;ckba;ckbb	>tr|Q7T306|Q7T306_DANRE Ckmb protein OS=Danio rerio GN=ckmb PE=2 SV=1;>tr|A2BHA3|A2BHA3_DANRE Creatine kinase, muscle OS=Danio rerio GN=ckm PE=3 SV=1;>tr|B8JJ23|B8JJ23_DANRE Creatine kinase, brain a (Fragment) OS=Danio rerio GN=CH211-219I7.2 PE=3 SV=1;>tr|	6	2	9.2	1.7516e-08	NA	NA	NA	NA	NA	NA	NA	NA	NA	14514000	35133000	NA
A2BHA7;A2BHA8;A2BHA9;A2BHB0;A2BHB2;Q6P0K2;A2BHA6	A2BHA7;A2BHA8;A2BHA9;A2BHB0;A2BHB2;Q6P0K2;A2BHA6	srsf7a	>tr|A2BHA7|A2BHA7_DANRE Novel protein (Zgc:77155) (Fragment) OS=Danio rerio GN=DKEY-85K8.3 PE=4 SV=1;>tr|A2BHA8|A2BHA8_DANRE Novel protein (Zgc:77155) (Fragment) OS=Danio rerio GN=DKEY-85K8.3 PE=4 SV=1;>tr|A2BHA9|A2BHA9_DANRE Novel protein (Zgc:77155) (Fra	7	6	30.7	1.6633e-20	202060000	168980000	230790000	NA	NA	NA	296090000	278610000	298860000	NA	NA	NA
A2CE73;Q6NW56	A2CE73;Q6NW56	khdrbs1a	>tr|A2CE73|A2CE73_DANRE KH domain containing, RNA binding, signal transduction associated 1 OS=Danio rerio GN=khdrbs1a PE=4 SV=1;>tr|Q6NW56|Q6NW56_DANRE KH domain containing, RNA binding, signal transduction associated 1 OS=Danio rerio GN=khdrbs1a PE=2 SV=	2	11	23.3	3.0176e-51	816790000	630490000	631770000	NA	NA	NA	1355900000	1253900000	932170000	NA	532630000	NA
A2CF31	A2CF31	atxn2	>tr|A2CF31|A2CF31_DANRE Novel protein similar to vertebrate ataxin 2 (ATXN2) OS=Danio rerio GN=si:dkey-165i4.1 PE=4 SV=2	1	5	7	2.2221e-35	NA	NA	NA	NA	NA	NA	29947000	25615000	27179000	NA	NA	NA
A2RRV6;F1QR51	A2RRV6;F1QR51	mex3b;LOC100330946	>tr|A2RRV6|A2RRV6_DANRE Zgc:158350 OS=Danio rerio GN=zgc:158350 PE=2 SV=1;>tr|F1QR51|F1QR51_DANRE Uncharacterized protein (Fragment) OS=Danio rerio PE=4 SV=1	2	2	6.7	2.7937e-06	NA	NA	NA	NA	NA	NA	NA	15346000	NA	NA	NA	NA
A2RUY5	A2RUY5	zgc:158399	>tr|A2RUY5|A2RUY5_DANRE Novel protein similar to vertebrate ubiquitin associated protein 2-like (UBAP2L, zgc:158399) OS=Danio rerio GN=CH211-220M6.1 PE=2 SV=1	1	4	5.1	1.1135e-16	NA	NA	NA	NA	NA	NA	28028000	20140000	32326000	NA	NA	NA
E7F7C7;A3KPR4	E7F7C7;A3KPR4	LOC100538129;wu:fe37d09	>tr|E7F7C7|E7F7C7_DANRE Histone H4 OS=Danio rerio PE=3 SV=1;>tr|A3KPR4|A3KPR4_DANRE Histone H4 OS=Danio rerio GN=wu:fe38f03 PE=3 SV=1	2	9	56.3	5.5938e-34	91874000	107840000	547010000	543940000	581600000	222930000	NA	NA	73861000	92335000	324680000	NA
A3KQN8	A3KQN8	si:dkey-119o24.1	>tr|A3KQN8|A3KQN8_DANRE Novel protein similar to vertebrate DEAH (Asp-Glu-Ala-His) box polypeptide 36 (DHX36) OS=Danio rerio GN=si:dkey-119o24.1 PE=4 SV=1	1	3	3.6	4.159e-06	7434800	8349000	NA	NA	NA	NA	NA	NA	NA	NA	NA	NA
A3KQS0	A3KQS0	mrpl9	>tr|A3KQS0|A3KQS0_DANRE Mitochondrial ribosomal protein L9 OS=Danio rerio GN=mrpl9 PE=4 SV=1	1	3	14.5	5.5623e-08	NA	NA	NA	NA	NA	NA	51802000	NA	21669000	NA	NA	NA
A8WG67;A8KBB5;A3KQV6;A3KQV5;F1QP30;F1R4X1	A8WG67;A8KBB5;A3KQV6;A3KQV5;F1QP30;F1R4X1	si:ch211-226h8.11;MGC172218;zgc:172218	>tr|A8WG67|A8WG67_DANRE Si:ch211-226h8.11 OS=Danio rerio GN=si:ch211-226h8.11 PE=2 SV=1;>tr|A8KBB5|A8KBB5_DANRE MGC172218 protein OS=Danio rerio GN=MGC172218 PE=2 SV=1;>tr|A3KQV6|A3KQV6_DANRE Novel protein containing a galactose binding lectin domain (Frag	6	2	10.3	0.00043256	NA	NA	214520000	NA	NA	NA	NA	NA	NA	NA	NA	NA
A5WVQ1;A5WVQ2;A5WVQ3	A5WVQ1	caprin1b	>tr|A5WVQ1|A5WVQ1_DANRE Cell cycle associated protein 1b OS=Danio rerio GN=caprin1b PE=4 SV=1	3	6	8.8	5.4706e-34	67626000	49922000	117920000	NA	NA	NA	50455000	37909000	109960000	NA	NA	NA
A5WVY7;Q802V7	A5WVY7	xrn2	>tr|A5WVY7|A5WVY7_DANRE 5-3 exoribonuclease 2 OS=Danio rerio GN=xrn2 PE=4 SV=1	2	4	4.4	8.5544e-09	NA	NA	NA	NA	NA	NA	NA	35355000	NA	NA	NA	NA
A5WWG5;A5WWG4	A5WWG5;A5WWG4	srsf3b	>tr|A5WWG5|A5WWG5_DANRE Serine/arginine-rich splicing factor 3b OS=Danio rerio GN=srsf3b PE=4 SV=1;>tr|A5WWG4|A5WWG4_DANRE Serine/arginine-rich splicing factor 3b OS=Danio rerio GN=srsf3b PE=4 SV=1	2	5	41.9	2.3205e-37	109210000	127630000	67453000	NA	NA	NA	177670000	112100000	178420000	NA	NA	NA
Q5XJD3;A7MCF0	Q5XJD3;A7MCF0	fip1l1;fip1l1b	>sp|Q5XJD3|FIP1_DANRE Pre-mRNA 3-end-processing factor FIP1 OS=Danio rerio GN=fip1l1 PE=1 SV=1;>tr|A7MCF0|A7MCF0_DANRE FIP1 like 1 (S. cerevisiae) OS=Danio rerio GN=fip1l1 PE=2 SV=1	2	3	8.8	1.8228e-35	NA	NA	NA	NA	NA	NA	21011000	17940000	19564000	NA	NA	NA
F8W5X1;E9QGV8;A7YYD9;E7FGA2;Q6NUT4	F8W5X1;E9QGV8;A7YYD9;E7FGA2;Q6NUT4	pabpn1	>tr|F8W5X1|F8W5X1_DANRE Poly(A)-binding protein, nuclear 1 OS=Danio rerio GN=pabpn1 PE=4 SV=1;>tr|E9QGV8|E9QGV8_DANRE Poly(A)-binding protein, nuclear 1 OS=Danio rerio GN=pabpn1 PE=4 SV=1;>tr|A7YYD9|A7YYD9_DANRE Pabpn1 protein OS=Danio rerio GN=pabpn1 PE=2	5	4	22	2.027e-23	NA	NA	NA	NA	NA	NA	147220000	244180000	231370000	NA	NA	NA
A8DZG2;F1QNA5;E7FFF7;Q5SPH2;Q5SPH1;Q4V988;Q5SPF9;Q6DHJ0	A8DZG2;F1QNA5;E7FFF7	srsf6b;srsf6a	>tr|A8DZG2|A8DZG2_DANRE Serine/arginine-rich splicing factor 6b OS=Danio rerio GN=sfrs6 PE=4 SV=1;>tr|F1QNA5|F1QNA5_DANRE Serine/arginine-rich-splicing factor 6a OS=Danio rerio GN=srsf6a PE=4 SV=1;>tr|E7FFF7|E7FFF7_DANRE Serine/arginine-rich-splicing facto	8	4	11.8	7.6142e-14	NA	NA	NA	NA	NA	NA	231730000	121960000	160750000	NA	NA	NA
E9QFG7;A8DZI0;Q1LXV6;F1Q4N1;Q1LV60	E9QFG7;A8DZI0	si:dkey-60b12.1	>tr|E9QFG7|E9QFG7_DANRE Si:dkey-60b12.1 OS=Danio rerio GN=si:dkey-60b12.1 PE=4 SV=1;>tr|A8DZI0|A8DZI0_DANRE Novel protein similar to vertebrate ring finger and CCCH-type zinc finger domains 1 (RC3H1) OS=Danio rerio GN=si:dkey-60b12.1 PE=4 SV=1	5	6	7.7	3.4118e-18	NA	NA	NA	NA	NA	NA	NA	NA	17685000	NA	NA	NA
A8E526	A8E526	rpl14	>tr|A8E526|A8E526_DANRE Ribosomal protein L14 OS=Danio rerio GN=rpl14 PE=2 SV=1	1	3	23.7	4.2605e-12	50224000	59460000	37183000	NA	NA	NA	91208000	81253000	84649000	NA	NA	NA
A8KB68;F1QA36	A8KB68;F1QA36	si:ch211-226h8.13;si:ch211-154a22.8	>tr|A8KB68|A8KB68_DANRE Si:ch211-226h8.13 OS=Danio rerio GN=si:ch211-226h8.13 PE=2 SV=1;>tr|F1QA36|F1QA36_DANRE Si:ch211-226h8.13 (Fragment) OS=Danio rerio GN=zgc:171717 PE=4 SV=1	2	2	14.9	2.4923e-08	NA	NA	NA	NA	NA	NA	NA	81616000	68732000	NA	NA	NA
Q6PI20;Q4QRF4;A8KBJ5;G1K2S9	Q6PI20;Q4QRF4;A8KBJ5;G1K2S9	h3f3a;zgc:173552;h3f3b.1	>sp|Q6PI20|H33_DANRE Histone H3.3 OS=Danio rerio GN=h3f3a PE=2 SV=3;>sp|Q4QRF4|H32_DANRE Histone H3.2 OS=Danio rerio GN=zgc:113984 PE=2 SV=3;>tr|A8KBJ5|A8KBJ5_DANRE Histone H3 OS=Danio rerio GN=zgc:173552 PE=2 SV=1;>tr|G1K2S9|G1K2S9_DANRE Histone H3 OS=Dan	4	2	12.5	7.008e-06	NA	NA	58546000	NA	NA	NA	NA	NA	NA	NA	NA	NA
F1Q577;A8KC22;F1RC33	F1Q577;A8KC22;F1RC33	hnrnpl2	>tr|F1Q577|F1Q577_DANRE Heterogeneous nuclear ribonucleoprotein L2 OS=Danio rerio GN=hnrnpl2 PE=4 SV=1;>tr|A8KC22|A8KC22_DANRE Heterogeneous nuclear ribonucleoprotein L2 OS=Danio rerio GN=hnrnpl2 PE=2 SV=1;>tr|F1RC33|F1RC33_DANRE Heterogeneous nuclear ribo	3	16	45.1	2.5746e-207	1018500000	907910000	846640000	2572700	2470100	6775400	364610000	391480000	520390000	NA	NA	NA
Q504B8;E7FD26;A8WHQ0;A8WHQ1;F1QQV4	Q504B8;E7FD26;A8WHQ0;A8WHQ1;F1QQV4	pcbp3	>tr|Q504B8|Q504B8_DANRE Novel protein similar to vertebrate poly(RC) binding protein 3 (PCBP3, zgc:109966) OS=Danio rerio GN=pcbp3 PE=2 SV=1;>tr|E7FD26|E7FD26_DANRE Poly(rC)-binding protein 3 OS=Danio rerio GN=pcbp3 PE=4 SV=1;>tr|A8WHQ0|A8WHQ0_DANRE Novel	5	4	24.1	1.0455e-37	NA	NA	NA	NA	NA	NA	NA	NA	13946000	NA	NA	NA
A9C3V8	A9C3V8	igf2bp2a	>tr|A9C3V8|A9C3V8_DANRE Insulin-like growth factor 2 mRNA binding protein 2a OS=Danio rerio GN=igf2bp2a PE=4 SV=1	1	2	4.6	2.1952e-06	NA	NA	NA	NA	NA	NA	NA	9641400	13554000	NA	NA	NA
A9C4A6;A9C4A8;A9C4A7	A9C4A6	mkrn4	>tr|A9C4A6|A9C4A6_DANRE Makorin, ring finger protein, 4 OS=Danio rerio GN=si:ch73-237c6.4 PE=4 SV=1	3	9	25.4	2.8451e-56	NA	NA	NA	NA	NA	NA	157840000	103260000	171430000	NA	NA	NA
B0R028	B0R028	psmb5	>tr|B0R028|B0R028_DANRE Proteasome subunit beta type OS=Danio rerio GN=psmb5 PE=3 SV=1	1	3	11.5	2.4324e-09	NA	NA	NA	NA	NA	16173000	NA	NA	NA	NA	NA	NA
B0R085;B0R086	B0R085;B0R086	zgc:103482	>tr|B0R085|B0R085_DANRE Novel protein similar to H.sapiens SERBP1, SERPINE1 mRNA binding protein 1 (SERBP1, zgc:103482) OS=Danio rerio GN=DKEY-30K6.2 PE=4 SV=1;>tr|B0R086|B0R086_DANRE Novel protein similar to H.sapiens SERBP1, SERPINE1 mRNA binding protein	2	5	26.5	3.6196e-88	57936000	46297000	NA	NA	NA	NA	42222000	60418000	106850000	NA	NA	NA
B0R171	B0R171	copb2	>tr|B0R171|B0R171_DANRE Coatomer protein complex, subunit beta 2 OS=Danio rerio GN=copb2 PE=2 SV=1	1	3	3.3	3.3457e-06	NA	NA	NA	6585600	NA	NA	NA	NA	NA	NA	NA	NA
B0S522;F1QI07	B0S522;F1QI07	rbm45	>tr|B0S522|B0S522_DANRE Novel protein similar to H.sapiens DRBP1, developmentally regulated RNA binding protein 1 (DRBP1) OS=Danio rerio GN=rbm45 PE=4 SV=1;>tr|F1QI07|F1QI07_DANRE RNA-binding motif protein 45 (Fragment) OS=Danio rerio GN=rbm45 PE=4 SV=1	2	5	14.1	3.6126e-18	NA	NA	NA	NA	NA	NA	96024000	34793000	64338000	NA	NA	NA
B0S618	B0S618	fastk	>tr|B0S618|B0S618_DANRE Novel protein similar to vertebrate Fas-activated serine/threonine kinase (FASTK) OS=Danio rerio GN=si:dkeyp-73d8.3 PE=4 SV=1	1	7	9.1	9.2124e-21	NA	NA	NA	NA	NA	NA	89193000	83924000	72466000	NA	NA	NA
B0S6P6;B0S6P7	B0S6P6	ddx3	>tr|B0S6P6|B0S6P6_DANRE DEAD (Asp-Glu-Ala-Asp) box polypeptide 3 OS=Danio rerio GN=ddx3 PE=3 SV=1	2	40	58	0	452770000	319250000	363900000	NA	NA	NA	435090000	554860000	392450000	NA	NA	NA
B0S6Z1	B0S6Z1	dhx9	>tr|B0S6Z1|B0S6Z1_DANRE DEAH (Asp-Glu-Ala-His) box polypeptide 9 OS=Danio rerio GN=si:ch211-194i4.1 PE=4 SV=1	1	16	15	2.1578e-76	79674000	19068000	NA	NA	NA	NA	55877000	93043000	151830000	NA	NA	NA
B0S7J5;Q4KME6	B0S7J5;Q4KME6	gigfy2;gigyf2	>tr|B0S7J5|B0S7J5_DANRE Novel protein similar to vertebrate trinucleotide repeat containing 15 (TNRC15, zgc:111944) OS=Danio rerio GN=DKEYP-12A9.1 PE=4 SV=1;>sp|Q4KME6|PERQ2_DANRE PERQ amino acid-rich with GYF domain-containing protein 2 OS=Danio rerio GN=	2	2	1.6	0.00013123	NA	NA	NA	NA	NA	NA	NA	NA	5777100	NA	NA	NA
F1QQ31;B0UYI3	F1QQ31;B0UYI3	mrpl37	>tr|F1QQ31|F1QQ31_DANRE Mitochondrial ribosomal protein L37 OS=Danio rerio GN=mrpl37 PE=4 SV=1;>tr|B0UYI3|B0UYI3_DANRE Mitochondrial ribosomal protein L37 OS=Danio rerio GN=mrpl37 PE=4 SV=1	2	15	34.8	1.2807e-128	352660000	758920000	254060000	NA	NA	NA	965290000	534610000	611440000	NA	NA	NA
B0V0J5	B0V0J5	zp2l1	>tr|B0V0J5|B0V0J5_DANRE Novel protein similar to zona pellucida glycoprotein 2.2 (Zp2.2) OS=Danio rerio GN=zp2l1 PE=4 SV=1	1	4	13.6	6.0183e-11	NA	NA	698800000	NA	NA	NA	NA	NA	NA	NA	NA	NA
F1Q9I4;B0V1K4	F1Q9I4;B0V1K4	zgc:136930	>tr|F1Q9I4|F1Q9I4_DANRE Zgc:136930 OS=Danio rerio GN=zgc:136930 PE=3 SV=1;>tr|B0V1K4|B0V1K4_DANRE Novel keratin family protein (Zgc:136930) OS=Danio rerio GN=DKEY-71K24.1 PE=3 SV=1	2	2	2.6	4.3037e-05	9847900	5435200	NA	11222000	8705500	7785700	NA	NA	NA	NA	NA	NA
B0V3S8;F1QRQ0;E7EZM9;B0V3S9	B0V3S8;F1QRQ0;E7EZM9;B0V3S9	myef2	>tr|B0V3S8|B0V3S8_DANRE Myelin expression factor 2 OS=Danio rerio GN=myef2 PE=4 SV=1;>tr|F1QRQ0|F1QRQ0_DANRE Myelin expression factor 2 OS=Danio rerio GN=myef2 PE=4 SV=1;>tr|E7EZM9|E7EZM9_DANRE Myelin expression factor 2 OS=Danio rerio GN=OTTDARG0000002677	4	19	42	1.5131e-301	766210000	946970000	530250000	NA	NA	NA	1222300000	835210000	1192400000	NA	NA	NA
Q5BJA5;Q05AK8;F1R4A4;B3DJF8;Q6PC60;F1RD54;F1R0S5;F1QKN7;F1QGY1;F1QF78;F1QAU0;G1K2T9;G1K2L0;F1RAY6;F1RAV8;F1QIH4;F1QG64;F1QAY4;F1QA71;F1Q9D0;E7FEC9;E7F459;E7F2U8;E7EXF4;G1K2M4;F1QGS7;G1K2V1;E9QHX5;E7EZA5;Q6DH91;F1QMJ9	Q5BJA5;Q05AK8;F1R4A4;B3DJF8;Q6PC60;F1RD54;F1R0S5;F1QKN7;F1QGY1;F1QF78;F1QAU0;G1K2T9;G1K2L0;F1RAY6;F1RAV8;F1QIH4;F1QG64;F1QAY4;F1QA71;F1Q9D0;E7FEC9;E7F459;E7F2U8;E7EXF4;G1K2M4;F1QGS7;G1K2V1;E9QHX5;E7EZA5	zgc:112234;zgc:171759;LOC570661;hist2h2l;wu:fe11b02;CABZ01086354.1;CR762436.3;zgc:173585;LOC100333437;CU302436.6	>sp|Q5BJA5|H2B1_DANRE Histone H2B 1/2 OS=Danio rerio GN=zgc:112234 PE=2 SV=3;>tr|Q05AK8|Q05AK8_DANRE Histone H2B OS=Danio rerio GN=wu:fe11b02 PE=2 SV=1;>tr|F1R4A4|F1R4A4_DANRE Histone H2B OS=Danio rerio GN=zgc:171759 PE=3 SV=1;>tr|B3DJF8|B3DJF8_DANRE Histo	31	4	38.7	1.329e-65	97094000	102000000	385720000	469920000	398330000	256250000	NA	46721000	77921000	NA	NA	NA
Q642J7;B7ZD34;B7ZD32	Q642J7;B7ZD34;B7ZD32	rps24	>tr|Q642J7|Q642J7_DANRE 40S ribosomal protein S24 OS=Danio rerio GN=rps24 PE=2 SV=1;>tr|B7ZD34|B7ZD34_DANRE 40S ribosomal protein S24 OS=Danio rerio GN=rps24 PE=3 SV=1;>tr|B7ZD32|B7ZD32_DANRE 40S ribosomal protein S24 OS=Danio rerio GN=rps24 PE=3 SV=1	3	4	35.1	5.8978e-22	250060000	NA	135290000	NA	NA	NA	128950000	55284000	190080000	NA	NA	NA
B7ZVC7;F1Q758;E9QB16	B7ZVC7;F1Q758;E9QB16	rbm38	>tr|B7ZVC7|B7ZVC7_DANRE RNA binding motif protein 38 OS=Danio rerio GN=rbm38 PE=2 SV=1;>tr|F1Q758|F1Q758_DANRE RNA-binding motif protein 38 OS=Danio rerio GN=rbm38 PE=4 SV=1;>tr|E9QB16|E9QB16_DANRE RNA-binding motif protein 38 OS=Danio rerio GN=rbm38 PE=4	3	7	23.1	4.9825e-40	225350000	287590000	289660000	NA	NA	NA	246610000	192300000	226100000	NA	NA	NA
B8A478;F1REK5;E9QFJ2;F1R6H3;F1Q995	B8A478;F1REK5;E9QFJ2;F1R6H3;F1Q995	zgc:171517;qdprb2;si:dkey-40h17.4	>tr|B8A478|B8A478_DANRE Novel protein similar to quinoid dihydropteridine reductase b2 (Qdprb2) OS=Danio rerio GN=zgc:171517 PE=4 SV=1;>tr|F1REK5|F1REK5_DANRE Quinoid dihydropteridine reductase b2 OS=Danio rerio GN=qdprb2 PE=4 SV=1;>tr|E9QFJ2|E9QFJ2_DANRE	5	2	12.8	3.4575e-05	NA	NA	NA	NA	NA	NA	NA	5915000	NA	NA	NA	NA
Q7SZR4;B8A4H6;Q7T3G4	Q7SZR4;B8A4H6;Q7T3G4	pgam1a;pgam1b;pgam2	>tr|Q7SZR4|Q7SZR4_DANRE Phosphoglycerate mutase OS=Danio rerio GN=pgam1a PE=2 SV=1;>tr|B8A4H6|B8A4H6_DANRE Phosphoglycerate mutase OS=Danio rerio GN=pgam1b PE=3 SV=1;>tr|Q7T3G4|Q7T3G4_DANRE Phosphoglycerate mutase OS=Danio rerio GN=pgam2 PE=2 SV=1	3	2	8.3	0.00011035	NA	NA	NA	NA	NA	NA	NA	NA	NA	1506900	NA	NA
F1RER6;B8A516;Q6NWK7;B8A518;Q6NWJ5;E7F244;F1QJ32;F1R6T2;Q6PC95;E7EYT7;Q6DC49;F1QQ90;F1QCY2	F1RER6;B8A516;Q6NWK7;B8A518;Q6NWJ5;E7F244;F1QJ32;F1R6T2;Q6PC95;E7EYT7;Q6DC49;F1QQ90;F1QCY2	tuba1b;tuba1a;tuba1c;tuba8l4;si:ch211-114n24.6;tuba8l2;si:ch73-199e17.1;tuba8l3	>tr|F1RER6|F1RER6_DANRE Tubulin, alpha 1 (Fragment) OS=Danio rerio GN=tuba1 PE=3 SV=1;>tr|B8A516|B8A516_DANRE Tubulin, alpha 1 OS=Danio rerio GN=tuba1 PE=3 SV=1;>tr|Q6NWK7|Q6NWK7_DANRE Tuba1 protein OS=Danio rerio GN=tuba1l2 PE=2 SV=1;>tr|B8A518|B8A518_DAN	13	4	13.2	2.98e-12	NA	4597800	70291000	10644000	NA	NA	NA	NA	NA	NA	NA	NA
B8A5E1;Q1RLP6	B8A5E1;Q1RLP6	zgc:136953	>tr|B8A5E1|B8A5E1_DANRE Novel protein similar to vertebrate heterogeneous nuclear ribonucleoprotein H1 (H) (HNRPH1, zgc:136953) OS=Danio rerio GN=CH211-1N9.3 PE=4 SV=1;>tr|Q1RLP6|Q1RLP6_DANRE Zgc:136953 OS=Danio rerio GN=zgc:136953 PE=2 SV=1	2	4	12.6	3.297e-20	NA	NA	NA	NA	NA	NA	NA	18759000	15649000	NA	NA	NA
B8A5I7	B8A5I7	ssbp1	>tr|B8A5I7|B8A5I7_DANRE Novel protein similar to vertebrate single-stranded DNA binding protein 1 (SSBP1, zgc:110325) OS=Danio rerio GN=CH211-258F14.1 PE=4 SV=1	1	10	54.8	1.4814e-298	1222100000	1641800000	2989700000	890220000	1287900000	3083000000	104760000	352470000	307520000	NA	24097000	NA
B8A609;B8A610	B8A609;B8A610	ddx43	>tr|B8A609|B8A609_DANRE DEAD (Asp-Glu-Ala-Asp) box polypeptide 43 OS=Danio rerio GN=ddx43 PE=3 SV=1;>tr|B8A610|B8A610_DANRE DEAD (Asp-Glu-Ala-Asp) box polypeptide 43 OS=Danio rerio GN=ddx43 PE=4 SV=1	2	2	3.9	7.1205e-10	NA	NA	NA	NA	NA	NA	NA	34327000	NA	NA	NA	NA
B8JIA4;F1QCE7;F1QTM2;F1QBB2	B8JIA4	whsc1	>tr|B8JIA4|B8JIA4_DANRE Novel protein OS=Danio rerio GN=whsc1 PE=4 SV=1	4	3	2.3	5.2477e-06	11057000	9770300	NA	NA	NA	NA	NA	NA	NA	NA	NA	NA
B8JL30;B8JL29;B8JL31	B8JL30;B8JL29	hmgb2a	>tr|B8JL30|B8JL30_DANRE High-mobility group box 2 OS=Danio rerio GN=hmgb2 PE=4 SV=1;>tr|B8JL29|B8JL29_DANRE High-mobility group box 2 OS=Danio rerio GN=hmgb2 PE=4 SV=1	3	3	16.1	9.3288e-09	NA	9079300	NA	NA	NA	NA	NA	NA	NA	NA	NA	NA
B8JL34;F1QMD2;F1QSU8	B8JL34;F1QMD2;F1QSU8	zgc:123010	>tr|B8JL34|B8JL34_DANRE Novel protein with a RNA recognition motif. (A.k.a. RRM, RBD, or RNP domain) (Zgc:123010) OS=Danio rerio GN=CH73-123I13.3 PE=4 SV=1;>tr|F1QMD2|F1QMD2_DANRE Zgc:123010 OS=Danio rerio GN=zgc:123010 PE=4 SV=1;>tr|F1QSU8|F1QSU8_DANRE Zg	3	4	10.3	5.604e-10	NA	NA	NA	NA	NA	NA	35008000	20462000	39907000	NA	NA	NA
B8JL46;F1R101	B8JL46;F1R101	zgc:158450	>tr|B8JL46|B8JL46_DANRE Novel protein (Zgc:158450) OS=Danio rerio GN=CH73-211A15.2 PE=4 SV=1;>tr|F1R101|F1R101_DANRE Zgc:158450 OS=Danio rerio GN=zgc:158450 PE=4 SV=1	2	15	9.8	5.592e-47	160020000	98238000	106140000	NA	19555000	NA	202990000	127580000	170850000	NA	NA	NA
B8JLJ8;A3KPS1;E7F950;Q7ZUT0	B8JLJ8	hnrpkl	>tr|B8JLJ8|B8JLJ8_DANRE Heterogeneous nuclear ribonucleoprotein K, like OS=Danio rerio GN=hnrpkl PE=4 SV=1	4	8	25.1	1.1554e-109	NA	NA	NA	NA	NA	NA	18787000	33840000	56750000	NA	NA	NA
E7EY75;B8JLQ3;F1R6L6;E9QB18	E7EY75;B8JLQ3;F1R6L6;E9QB18	ncl	>tr|E7EY75|E7EY75_DANRE Nucleolin OS=Danio rerio GN=OTTDARG00000029258 PE=4 SV=1;>tr|B8JLQ3|B8JLQ3_DANRE Novel protein similar to H.sapiens NCL, nucleolin (NCL, zgc:152810) OS=Danio rerio GN=ncl PE=4 SV=1;>tr|F1R6L6|F1R6L6_DANRE Nucleolin OS=Danio rerio GN	4	28	40.1	0	4029900000	3737200000	1906600000	NA	3444300	3346100	4287400000	3389800000	4463400000	NA	425350000	NA
B8JLU1;F1QIN2;A2RRV3	B8JLU1;F1QIN2;A2RRV3	patl1	>tr|B8JLU1|B8JLU1_DANRE Novel protein (Zgc:158239) (Fragment) OS=Danio rerio GN=patl1 PE=4 SV=1;>tr|F1QIN2|F1QIN2_DANRE Protein-associated with topoisomerase II homolog 1 (yeast) OS=Danio rerio GN=patl1 PE=4 SV=1;>sp|A2RRV3|PATL1_DANRE Protein PAT1 homolog	3	2	4	9.7936e-09	NA	NA	NA	NA	NA	NA	NA	NA	5356800	NA	NA	NA
B8JLU8	B8JLU8	si:ch73-90k17.1	>tr|B8JLU8|B8JLU8_DANRE Novel protein (Fragment) OS=Danio rerio GN=si:ch73-90k17.1 PE=4 SV=1	1	2	6.4	0.0001412	NA	NA	38992000	NA	NA	NA	NA	NA	NA	NA	NA	NA
F1QKQ4;B8JMA9;F1QJZ5	F1QKQ4;B8JMA9;F1QJZ5	wdr33	>tr|F1QKQ4|F1QKQ4_DANRE WD repeat domain 33 OS=Danio rerio GN=wdr33 PE=4 SV=1;>tr|B8JMA9|B8JMA9_DANRE WD repeat domain 33 (Fragment) OS=Danio rerio GN=wdr33 PE=4 SV=1;>tr|F1QJZ5|F1QJZ5_DANRE WD repeat domain 33 OS=Danio rerio GN=wdr33 PE=4 SV=1	3	4	9	7.3078e-12	46590000	43191000	39844000	NA	NA	NA	54272000	33757000	27551000	NA	NA	NA
E7EY23;F1R595;Q6DRE8	E7EY23;F1R595;Q6DRE8	snrnp70	>tr|E7EY23|E7EY23_DANRE Small nuclear ribonucleoprotein 70 (U1) OS=Danio rerio GN=OTTDARG00000019972 PE=4 SV=2;>tr|F1R595|F1R595_DANRE Small nuclear ribonucleoprotein 70 (U1) OS=Danio rerio GN=snrnp70 PE=4 SV=1;>tr|Q6DRE8|Q6DRE8_DANRE Small nuclear ribonuc	3	2	11.1	0.0012662	NA	NA	NA	NA	NA	NA	NA	NA	7480500	NA	NA	NA
E7EYA6;F1Q664;F1Q663	E7EYA6;F1Q664;F1Q663	fmr1	>tr|E7EYA6|E7EYA6_DANRE Fragile X mental retardation 1 OS=Danio rerio GN=OTTDARG00000020929 PE=4 SV=1;>tr|F1Q664|F1Q664_DANRE Fragile X mental retardation 1 OS=Danio rerio GN=fmr1 PE=4 SV=1;>tr|F1Q663|F1Q663_DANRE Fragile X mental retardation 1 OS=Danio re	3	12	25.6	8.2114e-38	95941000	91093000	71751000	NA	NA	NA	117930000	113280000	186570000	NA	NA	NA
E7EYA8	E7EYA8	CABZ01073334.1	>tr|E7EYA8|E7EYA8_DANRE Uncharacterized protein OS=Danio rerio GN=CABZ01073334.1 PE=4 SV=1	1	12	74.1	0	1195300000	1015600000	683340000	NA	NA	NA	1487600000	1198500000	1169400000	NA	325300000	NA
F1QX94;E7EYD8;F1QF82	F1QX94;E7EYD8	eif4g3b	>tr|F1QX94|F1QX94_DANRE Uncharacterized protein (Fragment) OS=Danio rerio PE=4 SV=1;>tr|E7EYD8|E7EYD8_DANRE Uncharacterized protein OS=Danio rerio GN=OTTDARG00000030376 PE=4 SV=1	3	5	3.9	1.3328e-10	NA	NA	NA	NA	NA	NA	25286000	19280000	16688000	NA	NA	NA
E9QBX4;E7EZ26;E9QGY6	E9QBX4;E7EZ26;E9QGY6	pabpn1l	>tr|E9QBX4|E9QBX4_DANRE Poly(A)-binding protein, nuclear 1,-like OS=Danio rerio GN=pabpn1l PE=4 SV=1;>tr|E7EZ26|E7EZ26_DANRE Poly(A) binding protein, nuclear 1, like OS=Danio rerio GN=OTTDARG00000022324 PE=4 SV=1;>tr|E9QGY6|E9QGY6_DANRE Poly(A)-binding pro	3	2	14.2	6.1488e-05	NA	NA	NA	NA	NA	NA	14753000	13832000	NA	NA	NA	NA
E7EZU9	E7EZU9	BX548000.3	>tr|E7EZU9|E7EZU9_DANRE Uncharacterized protein OS=Danio rerio GN=BX548000.3 PE=4 SV=1	1	3	7.3	9.6845e-11	NA	NA	108410000	NA	NA	NA	NA	NA	NA	NA	NA	NA
E7EZV4;A3KQR6;A8HAI7;A3KQR5;F1R0T1;F1QJD7	E7EZV4;A3KQR6;A8HAI7;A3KQR5;F1R0T1;F1QJD7	si:ch211-226h8.14;si:dkey-240e12.6;si:ch211-12h2.6;si:ch73-189n23.1	>tr|E7EZV4|E7EZV4_DANRE Si:ch211-226h8.14 OS=Danio rerio GN=OTTDARG00000012141 PE=4 SV=1;>tr|A3KQR6|A3KQR6_DANRE Novel protein containing galactose binding lectin domain OS=Danio rerio GN=si:dkey-240e12.6 PE=4 SV=1;>tr|A8HAI7|A8HAI7_DANRE Novel protein (Zg	6	4	18.2	6.8461e-10	13957000	24770000	2900900000	NA	13675000	14739000	NA	NA	NA	NA	NA	NA
E7F1G8	E7F1G8	wu:fk48d07	>tr|E7F1G8|E7F1G8_DANRE Uncharacterized protein OS=Danio rerio GN=wu:fk48d07 PE=3 SV=1	1	19	42.4	1.0711e-164	200510000	166050000	86382000	NA	NA	NA	339510000	394020000	379880000	NA	NA	NA
E7F1H9	E7F1H9	yth2	>tr|E7F1H9|E7F1H9_DANRE Uncharacterized protein OS=Danio rerio GN=yth2 PE=4 SV=1	1	5	8.8	1.063e-09	NA	NA	NA	NA	NA	NA	23817000	16366000	26143000	NA	NA	NA
F8W2C4;F1R8E4;E7F1I8	F8W2C4;F1R8E4;E7F1I8	cat	>tr|F8W2C4|F8W2C4_DANRE Catalase (Fragment) OS=Danio rerio GN=cat PE=3 SV=1;>tr|F1R8E4|F1R8E4_DANRE Catalase OS=Danio rerio GN=cat PE=3 SV=1;>tr|E7F1I8|E7F1I8_DANRE Catalase OS=Danio rerio GN=cat PE=3 SV=1	3	2	3.6	1.9842e-05	NA	NA	NA	NA	NA	NA	NA	NA	NA	27444000	35228000	NA
E9QJ40;E7F1Z6	E9QJ40;E7F1Z6	fam120c	>tr|E9QJ40|E9QJ40_DANRE Family with sequence similarity 120C OS=Danio rerio GN=fam120c PE=4 SV=1;>tr|E7F1Z6|E7F1Z6_DANRE Family with sequence similarity 120C OS=Danio rerio GN=OTTDARG00000030550 PE=4 SV=1	2	4	4.7	4.3024e-12	NA	NA	NA	NA	NA	NA	57399000	50817000	45152000	NA	NA	NA
F8W2Y9;E7F2D1	F8W2Y9;E7F2D1	usp10	>tr|F8W2Y9|F8W2Y9_DANRE Ubiquitin carboxyl-terminal hydrolase OS=Danio rerio GN=usp10 PE=3 SV=1;>tr|E7F2D1|E7F2D1_DANRE Ubiquitin carboxyl-terminal hydrolase OS=Danio rerio GN=CU693489.1 PE=3 SV=1	2	2	3.5	1.4162e-09	NA	NA	NA	NA	NA	NA	10002000	10069000	19232000	NA	NA	NA
E7F2U7;F1QIH9;F1R9Z1	E7F2U7;F1QIH9;F1R9Z1	zgc:173556	>tr|E7F2U7|E7F2U7_DANRE Uncharacterized protein OS=Danio rerio GN=zgc:173556 PE=4 SV=1;>tr|F1QIH9|F1QIH9_DANRE Zgc:173556 OS=Danio rerio GN=zgc:173556 PE=4 SV=1;>tr|F1R9Z1|F1R9Z1_DANRE Zgc:173556 OS=Danio rerio GN=zgc:173556 PE=4 SV=1	3	9	28.5	1.813e-54	NA	68006000	828680000	NA	NA	NA	NA	NA	NA	NA	NA	NA
E7F304;Q9IBD0;F1R2H3;E9QIE8;Q6P0B1-5;F1QCR6;Q6P0B1-4;Q6P0B1-3;Q6P0B1-2;Q4U0V5;F1QSG1;E7FEV4;Q6P0B1;E7F7K3	E7F304;Q9IBD0;F1R2H3;E9QIE8	celf1	>tr|E7F304|E7F304_DANRE Cugbp, Elav-like family member 1 OS=Danio rerio GN=OTTDARG00000020225 PE=4 SV=1;>sp|Q9IBD0|CELF1_DANRE CUGBP Elav-like family member 1 OS=Danio rerio GN=celf1 PE=1 SV=1;>tr|F1R2H3|F1R2H3_DANRE Cugbp, Elav-like family member 1 OS=Dan	14	17	34.8	0	3807000000	3126200000	3128900000	NA	NA	NA	3422800000	1872200000	3500500000	NA	347660000	NA
E7F3J2	E7F3J2	hnrnpua	>tr|E7F3J2|E7F3J2_DANRE Uncharacterized protein OS=Danio rerio GN=wu:fc51c09 PE=4 SV=1	1	14	20.1	4.7595e-58	88559000	93808000	NA	NA	NA	NA	93901000	125920000	117060000	NA	NA	NA
E7F3K7	E7F3K7	tbrg4	>tr|E7F3K7|E7F3K7_DANRE Transforming growth factor beta regulator 4 OS=Danio rerio GN=OTTDARG00000033339 PE=4 SV=1	1	7	10.3	1.5231e-26	92822000	87584000	63268000	NA	18897000	19902000	97674000	92540000	55864000	NA	NA	NA
F1RED5;E7FEK4;E7F3L3;E7FFZ3;E7FFL8;F1RCB4;F1R2I8;F1REP2;F1QS86;F1QF63;F1QIP9	F1RED5;E7FEK4;E7F3L3;E7FFZ3	si:dkey-46g23.3;si:dkey-46g23.2	>tr|F1RED5|F1RED5_DANRE Si:dkey-46g23.3 OS=Danio rerio GN=si:dkey-46g23.3 PE=4 SV=1;>tr|E7FEK4|E7FEK4_DANRE Si:dkey-46g23.3 OS=Danio rerio GN=si:dkey-46g23.3 PE=4 SV=1;>tr|E7F3L3|E7F3L3_DANRE Si:dkey-46g23.3 OS=Danio rerio GN=OTTDARG00000023221 PE=4 SV=1;>	11	3	2.2	1.1899e-06	NA	NA	NA	NA	NA	NA	97196000	26682000	19200000	NA	NA	NA
E7F3N2	E7F3N2	zar1l	>tr|E7F3N2|E7F3N2_DANRE Im:7158796 OS=Danio rerio GN=im:7158796 PE=4 SV=1	1	8	30.4	1.4364e-23	145980000	99150000	69005000	NA	NA	20564000	NA	53036000	57409000	NA	NA	NA
E7F3R2;F1R1U6	E7F3R2	CU467646.1	>tr|E7F3R2|E7F3R2_DANRE Uncharacterized protein OS=Danio rerio GN=CU467646.1 PE=4 SV=1	2	11	23.5	4.1928e-298	NA	356110000	8525000000	NA	NA	NA	NA	NA	NA	NA	NA	NA
Q6PFQ2;F1QUG5;E7F475	Q6PFQ2;F1QUG5;E7F475	eif3c	>sp|Q6PFQ2|EIF3C_DANRE Eukaryotic translation initiation factor 3 subunit C OS=Danio rerio GN=eif3c PE=1 SV=1;>tr|F1QUG5|F1QUG5_DANRE Eukaryotic translation initiation factor 3, subunit C OS=Danio rerio GN=eif3c PE=4 SV=1;>tr|E7F475|E7F475_DANRE Eukaryotic	3	16	18.5	3.0455e-104	236480000	192530000	302420000	NA	NA	NA	268490000	237510000	668480000	NA	NA	NA
E7F4I4	E7F4I4	CABZ01085054.1	>tr|E7F4I4|E7F4I4_DANRE Uncharacterized protein OS=Danio rerio GN=CABZ01085054.1 PE=4 SV=1	1	5	5.9	2.197e-22	NA	NA	21480000	NA	NA	NA	NA	NA	NA	NA	NA	NA
E7F4T4	E7F4T4	zc3h7b	>tr|E7F4T4|E7F4T4_DANRE Zinc finger CCCH-type-containing 7B OS=Danio rerio GN=zc3h7b PE=4 SV=1	1	17	23.9	2.1878e-196	400320000	362520000	121250000	NA	NA	NA	196060000	378930000	346040000	NA	17991000	NA
E7F5D8	E7F5D8		>tr|E7F5D8|E7F5D8_DANRE Uncharacterized protein OS=Danio rerio PE=4 SV=1	1	24	19.5	7.8283e-291	79638000	69063000	97490000	14247000	26554000	103810000	583720000	457790000	303060000	NA	NA	NA
E7F5Q7	E7F5Q7	ascc3	>tr|E7F5Q7|E7F5Q7_DANRE Uncharacterized protein OS=Danio rerio PE=4 SV=1	1	3	4.7	4.7129e-07	NA	NA	NA	NA	NA	NA	NA	NA	12989000	NA	NA	NA
Q7ZVT2;E7F5U9;E7FAD4;F1RBK3;F1QSE0;F1QEN1	Q7ZVT2;E7F5U9;E7FAD4	pkma	>tr|Q7ZVT2|Q7ZVT2_DANRE Pyruvate kinase OS=Danio rerio GN=pkm2a PE=2 SV=1;>tr|E7F5U9|E7F5U9_DANRE Pyruvate kinase OS=Danio rerio GN=pkm2a PE=3 SV=1;>tr|E7FAD4|E7FAD4_DANRE Pyruvate kinase OS=Danio rerio GN=pkm2a PE=3 SV=1	6	6	9.4	3.0559e-13	NA	NA	NA	25069000	29447000	40869000	NA	NA	NA	61781000	51078000	NA
Q7ZWE3;F1R347;E7F7F2	Q7ZWE3;F1R347;E7F7F2	larp7	>sp|Q7ZWE3|LARP7_DANRE La-related protein 7 OS=Danio rerio GN=larp7 PE=2 SV=1;>tr|F1R347|F1R347_DANRE La ribonucleoprotein domain family, member 7 OS=Danio rerio GN=larp7 PE=4 SV=1;>tr|E7F7F2|E7F7F2_DANRE La ribonucleoprotein domain family, member 7 OS=Dan	3	2	5.2	1.2069e-05	NA	NA	NA	NA	NA	NA	NA	NA	6437300	NA	NA	NA
F1Q6F9;E7F7Q8;F1QKM5	F1Q6F9;E7F7Q8;F1QKM5	sltm	>tr|F1Q6F9|F1Q6F9_DANRE SAFB-like, transcription modulator OS=Danio rerio GN=sltm PE=4 SV=1;>tr|E7F7Q8|E7F7Q8_DANRE SAFB-like, transcription modulator OS=Danio rerio GN=sltm PE=4 SV=1;>tr|F1QKM5|F1QKM5_DANRE SAFB-like, transcription modulator OS=Danio reri	3	2	2	2.6368e-07	NA	NA	NA	NA	NA	NA	NA	NA	20926000	NA	NA	NA
E9QEK4;E7F889;E9QG76;F1Q718	E9QEK4;E7F889;E9QG76;F1Q718	mrpl45	>tr|E9QEK4|E9QEK4_DANRE Mitochondrial ribosomal protein L45 OS=Danio rerio GN=mrpl45 PE=4 SV=1;>tr|E7F889|E7F889_DANRE Mitochondrial ribosomal protein L45 OS=Danio rerio GN=mrpl45 PE=4 SV=1;>tr|E9QG76|E9QG76_DANRE Mitochondrial ribosomal protein L45 OS=Dan	4	5	15.8	1.055e-09	47776000	55601000	53221000	NA	NA	NA	NA	NA	NA	NA	NA	NA
E7F8F4	E7F8F4	ascc3	>tr|E7F8F4|E7F8F4_DANRE Uncharacterized protein OS=Danio rerio PE=4 SV=1	1	4	10.6	5.8908e-54	20613000	NA	NA	NA	NA	NA	NA	NA	NA	NA	NA	NA
E7F8R3	E7F8R3	im:6908224	>tr|E7F8R3|E7F8R3_DANRE Im:6908224 OS=Danio rerio GN=im:6908224 PE=4 SV=1	1	3	11.2	2.1457e-08	NA	NA	NA	NA	NA	NA	NA	NA	22630000	NA	NA	NA
E7F8S4	E7F8S4	LOC557518	>tr|E7F8S4|E7F8S4_DANRE Uncharacterized protein OS=Danio rerio PE=4 SV=1	1	2	2.9	2.723e-05	NA	NA	NA	56795000	NA	NA	NA	NA	NA	NA	NA	NA
F1R9Y8;E7F9M4;F1QB10;E9QDS1;E7FCA5	F1R9Y8;E7F9M4;F1QB10	hdlbp	>tr|F1R9Y8|F1R9Y8_DANRE High density lipoprotein-binding protein (vigilin) OS=Danio rerio GN=hdlbp PE=4 SV=1;>tr|E7F9M4|E7F9M4_DANRE High density lipoprotein-binding protein (vigilin) OS=Danio rerio GN=hdlbp PE=4 SV=1;>tr|F1QB10|F1QB10_DANRE High density l	5	39	37.3	0	532630000	267770000	596790000	NA	NA	NA	295460000	249610000	714480000	NA	257000000	NA
E9QC91;E7F9N3	E9QC91;E7F9N3	prrc2a	>tr|E9QC91|E9QC91_DANRE Proline-rich coiled-coil 2A OS=Danio rerio GN=prrc2a PE=4 SV=1;>tr|E7F9N3|E7F9N3_DANRE Proline-rich coiled-coil 2A OS=Danio rerio GN=prrc2a PE=4 SV=1	2	12	9.3	1.0433e-49	NA	NA	NA	NA	NA	NA	104530000	57032000	98923000	NA	NA	NA
E7FAA3;F1QZW2;F1Q561;F1QAP4	E7FAA3;F1QZW2;F1Q561	raver1	>tr|E7FAA3|E7FAA3_DANRE Ribonucleoprotein, PTB-binding 1 OS=Danio rerio GN=raver1 PE=4 SV=1;>tr|F1QZW2|F1QZW2_DANRE Ribonucleoprotein, PTB-binding 1 OS=Danio rerio GN=raver1 PE=4 SV=1;>tr|F1Q561|F1Q561_DANRE Ribonucleoprotein, PTB-binding 1 OS=Danio rerio	4	6	10.8	1.5156e-23	NA	NA	91565000	NA	NA	NA	73866000	43060000	44384000	NA	NA	NA
E7FAQ8;E7FAB3	E7FAQ8;E7FAB3	zgc:66127	>tr|E7FAQ8|E7FAQ8_DANRE Zgc:66127 OS=Danio rerio GN=zgc:66127 PE=4 SV=1;>tr|E7FAB3|E7FAB3_DANRE Zgc:66127 OS=Danio rerio GN=zgc:66127 PE=4 SV=1	2	9	26.5	3.3752e-52	442700000	413290000	150440000	NA	NA	NA	346230000	431140000	586230000	NA	113310000	NA
E7FAC4	E7FAC4	si:ch211-103b1.2	>tr|E7FAC4|E7FAC4_DANRE Uncharacterized protein OS=Danio rerio PE=4 SV=1	1	13	18.9	1.288e-147	255230000	410860000	94887000	NA	NA	30331000	171620000	249030000	194630000	NA	37709000	NA
E7FAI6	E7FAI6		>tr|E7FAI6|E7FAI6_DANRE Uncharacterized protein OS=Danio rerio PE=4 SV=1	1	9	34.5	0	NA	89251000	3321100000	NA	NA	NA	NA	NA	NA	NA	NA	NA
E7FAP0	E7FAP0	ythdf3	>tr|E7FAP0|E7FAP0_DANRE Uncharacterized protein OS=Danio rerio GN=ythdf3 PE=4 SV=2	1	5	9.5	1.3036e-12	NA	NA	NA	NA	NA	NA	43194000	27733000	41028000	NA	NA	NA
E7FAV9;Q1LXK4;Q1LXK5	E7FAV9	mov10a	>tr|E7FAV9|E7FAV9_DANRE Moloney leukemia virus 10, homolog, a OS=Danio rerio GN=mov10a PE=4 SV=1	3	15	18	9.233e-91	74349000	98812000	101820000	NA	NA	NA	227610000	111740000	109190000	NA	NA	NA
E7FBQ7	E7FBQ7	LOC100535593	>tr|E7FBQ7|E7FBQ7_DANRE Uncharacterized protein OS=Danio rerio PE=4 SV=1	1	9	10.1	4.7914e-18	NA	NA	NA	NA	NA	NA	36376000	37563000	21738000	NA	NA	NA
E7FBT1	E7FBT1	LOC100334800	>tr|E7FBT1|E7FBT1_DANRE Uncharacterized protein OS=Danio rerio PE=4 SV=1	1	2	10.2	2.3647e-06	NA	NA	51760000	NA	NA	NA	NA	NA	NA	NA	NA	NA
E7FCQ0	E7FCQ0	cnbpb	>tr|E7FCQ0|E7FCQ0_DANRE CCHC-type zinc finger, nucleic acid-binding protein OS=Danio rerio GN=cnbp PE=4 SV=1	1	5	19.3	8.145e-109	NA	NA	NA	NA	NA	NA	65293000	40353000	72949000	NA	NA	NA
E7FD91	E7FD91	ddx6	>tr|E7FD91|E7FD91_DANRE DEAD (Asp-Glu-Ala-Asp) box polypeptide 6 OS=Danio rerio GN=ddx6 PE=3 SV=1	1	21	46.6	0	671930000	704570000	244780000	11544000	24704000	14421000	763160000	990790000	779440000	NA	14438000	NA
Q6P969;Q568F0;F1QI74;E7FD96;Q92005;Q6DHT2;E9QGR4;F1QQW9	Q6P969;Q568F0;F1QI74;E7FD96;Q92005;Q6DHT2;E9QGR4	eef1a1a;eef1a1b;eef1a1l1;eef1a;eef1a2	>tr|Q6P969|Q6P969_DANRE Elongation factor 1-alpha OS=Danio rerio GN=zgc:73138 PE=2 SV=1;>tr|Q568F0|Q568F0_DANRE Elongation factor 1-alpha OS=Danio rerio GN=CH211-269I23.1 PE=2 SV=1;>tr|F1QI74|F1QI74_DANRE Elongation factor 1-alpha OS=Danio rerio PE=3 SV=1;	8	5	12.1	2.4743e-15	22721000	NA	NA	122880000	96632000	57057000	NA	59753000	59923000	53618000	NA	NA
F1QIJ0;E7FDQ5	F1QIJ0;E7FDQ5	caprin1a	>tr|F1QIJ0|F1QIJ0_DANRE Cell cycle-associated protein 1a OS=Danio rerio GN=caprin1a PE=4 SV=1;>tr|E7FDQ5|E7FDQ5_DANRE Cell cycle-associated protein 1a OS=Danio rerio GN=caprin1a PE=4 SV=1	2	4	8.2	5.9672e-79	NA	NA	34660000	NA	NA	NA	44501000	38262000	50639000	NA	NA	NA
E7FDR0	E7FDR0	eif4enif1	>tr|E7FDR0|E7FDR0_DANRE Eukaryotic translation initiation factor 4E nuclear import factor 1 OS=Danio rerio GN=eif4enif1 PE=4 SV=1	1	26	32.5	2.205e-300	692360000	254110000	184480000	NA	7390400	6067400	1016800000	273970000	1035300000	NA	NA	NA
E7FGU5;E7FEV7	E7FGU5;E7FEV7		>tr|E7FGU5|E7FGU5_DANRE Uncharacterized protein OS=Danio rerio PE=4 SV=1;>tr|E7FEV7|E7FEV7_DANRE Uncharacterized protein OS=Danio rerio PE=4 SV=1	2	3	4.1	1.6842e-07	NA	NA	69405000	NA	NA	NA	NA	NA	NA	NA	NA	NA
E7FEW2	E7FEW2	LOC563801	>tr|E7FEW2|E7FEW2_DANRE Uncharacterized protein OS=Danio rerio PE=4 SV=1	1	13	25.8	5.1578e-80	144690000	195070000	131280000	34571000	301320000	310700000	166220000	244260000	192090000	NA	NA	NA
E7FFD9	E7FFD9	LOC100536140	>tr|E7FFD9|E7FFD9_DANRE Uncharacterized protein OS=Danio rerio PE=4 SV=1	1	5	13.3	7.3499e-16	NA	NA	NA	NA	NA	NA	74900000	44091000	40453000	NA	NA	NA
E7FFV0	E7FFV0	pum1	>tr|E7FFV0|E7FFV0_DANRE Pumilio homolog 1 (Drosophila) OS=Danio rerio GN=pum1 PE=4 SV=1	1	19	18.5	1.2142e-214	408320000	345960000	427740000	NA	NA	NA	812280000	552530000	652070000	NA	NA	NA
Q9YGX5;E9QB15;A2CE68	Q9YGX5;E9QB15	cpeb1;cpeb1b	>sp|Q9YGX5|CPEB1_DANRE Cytoplasmic polyadenylation element-binding protein 1 OS=Danio rerio GN=cpeb1 PE=1 SV=1;>tr|E9QB15|E9QB15_DANRE Orb/CPEB-related RNA-binding protein OS=Danio rerio GN=zorba PE=4 SV=1	3	12	30.8	0	143680000	140010000	202180000	NA	NA	NA	68412000	85191000	104300000	NA	NA	NA
E9QBF0;Q90XG0;Q1MTI4	E9QBF0;Q90XG0;Q1MTI4	tpi1b;tpi1a	>tr|E9QBF0|E9QBF0_DANRE Triosephosphate isomerase OS=Danio rerio GN=tpi1b PE=3 SV=1;>sp|Q90XG0|TPISB_DANRE Triosephosphate isomerase B OS=Danio rerio GN=tpi1b PE=2 SV=1;>sp|Q1MTI4|TPISA_DANRE Triosephosphate isomerase A OS=Danio rerio GN=tpi1a PE=2 SV=1	3	2	14.1	7.1059e-15	NA	NA	NA	NA	12167000	NA	NA	NA	NA	NA	NA	NA
E9QHB9;E9QCZ9;Q5PR46	E9QHB9;E9QCZ9;Q5PR46	fam113	>tr|E9QHB9|E9QHB9_DANRE Uncharacterized protein OS=Danio rerio PE=4 SV=1;>tr|E9QCZ9|E9QCZ9_DANRE Uncharacterized protein OS=Danio rerio PE=4 SV=1;>tr|Q5PR46|Q5PR46_DANRE Uncharacterized protein OS=Danio rerio GN=zgc:103558 PE=2 SV=1	3	2	11.2	0.0014751	NA	NA	NA	NA	NA	NA	NA	NA	3379000	NA	NA	NA
E9QF21;E9QEZ5	E9QF21;E9QEZ5	mrpl34	>tr|E9QF21|E9QF21_DANRE Ribosomal protein L34 OS=Danio rerio GN=si:dkey-77a20.7 PE=3 SV=1;>tr|E9QEZ5|E9QEZ5_DANRE Ribosomal protein L34 OS=Danio rerio GN=si:dkey-77a20.7 PE=3 SV=1	2	3	19.2	2.205e-07	NA	NA	NA	NA	NA	NA	77178000	58932000	50501000	NA	NA	NA
E9QF69;F1QN76;Q6DGL0	E9QF69;F1QN76;Q6DGL0	rpl18	>tr|E9QF69|E9QF69_DANRE 60S ribosomal protein L18 OS=Danio rerio PE=3 SV=1;>tr|F1QN76|F1QN76_DANRE 60S ribosomal protein L18 (Fragment) OS=Danio rerio PE=3 SV=1;>tr|Q6DGL0|Q6DGL0_DANRE 60S ribosomal protein L18 OS=Danio rerio GN=zgc:92872 PE=2 SV=1	3	5	36.6	1.3886e-25	NA	NA	NA	NA	NA	NA	270050000	137810000	95043000	NA	NA	NA
E9QFA1;F1QP18;E7F299;E9QJN0;E7F720	E9QFA1;F1QP18;E7F299;E9QJN0;E7F720	LOC100334195;zgc:175135;zgc:165551;LOC100538023	>tr|E9QFA1|E9QFA1_DANRE Uncharacterized protein OS=Danio rerio PE=4 SV=1;>tr|F1QP18|F1QP18_DANRE Zgc:175135 OS=Danio rerio GN=zgc:175135 PE=4 SV=1;>tr|E7F299|E7F299_DANRE Uncharacterized protein OS=Danio rerio GN=zgc:165551 PE=4 SV=1;>tr|E9QJN0|E9QJN0_DANR	5	3	13.2	2.4888e-42	NA	NA	616350000	NA	NA	NA	NA	NA	NA	NA	NA	NA
E9QFH8;E7F3H9;F1R386;E9QCU5	E9QFH8;E7F3H9	csde1	>tr|E9QFH8|E9QFH8_DANRE Si:ch211-261n11.2 OS=Danio rerio GN=si:ch211-261n11.2 PE=4 SV=1;>tr|E7F3H9|E7F3H9_DANRE Si:ch211-261n11.2 OS=Danio rerio GN=OTTDARG00000026582 PE=4 SV=1	4	32	49	0	699730000	947460000	319130000	12051000	17250000	NA	818880000	529080000	1371000000	NA	68220000	NA
E9QG02;F1RC77	E9QG02;F1RC77	fxr2	>tr|E9QG02|E9QG02_DANRE Fragile X mental retardation, autosomal homolog 2 OS=Danio rerio GN=fxr2 PE=4 SV=1;>tr|F1RC77|F1RC77_DANRE Fragile X mental retardation, autosomal homolog 2 OS=Danio rerio GN=fxr2 PE=4 SV=1	2	9	19.2	1.9314e-84	NA	NA	NA	NA	NA	NA	23022000	27171000	46384000	NA	NA	NA
E9QH84;F1QAT2	E9QH84;F1QAT2	gemin5	>tr|E9QH84|E9QH84_DANRE Gem (nuclear organelle)-associated protein 5 OS=Danio rerio GN=gemin5 PE=4 SV=1;>tr|F1QAT2|F1QAT2_DANRE Gem (nuclear organelle)-associated protein 5 (Fragment) OS=Danio rerio GN=gemin5 PE=4 SV=1	2	5	4.5	6.3529e-13	NA	NA	NA	NA	NA	NA	NA	NA	3069500	NA	NA	NA
E9QHD6;Q7ZV13;Q6NZT9	E9QHD6;Q7ZV13;Q6NZT9	srsf2a;srsf2b	>tr|E9QHD6|E9QHD6_DANRE Uncharacterized protein OS=Danio rerio PE=4 SV=1;>tr|Q7ZV13|Q7ZV13_DANRE Splicing factor, arginine/serine-rich 2 OS=Danio rerio GN=srsf2 PE=2 SV=1;>tr|Q6NZT9|Q6NZT9_DANRE Uncharacterized protein OS=Danio rerio GN=zgc:55876 PE=2 SV=1	3	6	32.8	5.3141e-99	NA	NA	118960000	NA	NA	NA	193550000	132220000	203860000	NA	NA	NA
E9QIF2;Q6TGV6;E9QFZ7	E9QIF2;Q6TGV6;E9QFZ7	psma5	>tr|E9QIF2|E9QIF2_DANRE Proteasome subunit alpha type OS=Danio rerio GN=psma5 PE=3 SV=1;>tr|Q6TGV6|Q6TGV6_DANRE Proteasome subunit alpha type OS=Danio rerio GN=psma5 PE=2 SV=1;>tr|E9QFZ7|E9QFZ7_DANRE Proteasome subunit alpha type OS=Danio rerio GN=psma5 PE	3	4	22.5	1.2698e-13	NA	NA	NA	21180000	NA	NA	NA	NA	NA	11922000	NA	NA
E9QIR9;Q7ZV96	E9QIR9;Q7ZV96	rpl10	>tr|E9QIR9|E9QIR9_DANRE Ribosomal protein L10 OS=Danio rerio GN=rpl10 PE=4 SV=1;>tr|Q7ZV96|Q7ZV96_DANRE QM protein OS=Danio rerio GN=rpl10 PE=2 SV=1	2	3	21.1	4.6611e-07	NA	NA	NA	NA	NA	NA	52188000	31080000	20040000	NA	NA	NA
F1QTC9;E9QIU2	F1QTC9;E9QIU2	alg13	>tr|F1QTC9|F1QTC9_DANRE Uncharacterized protein OS=Danio rerio PE=4 SV=1;>tr|E9QIU2|E9QIU2_DANRE Uncharacterized protein OS=Danio rerio PE=4 SV=1	2	3	4	3.0527e-08	49511000	47223000	60231000	NA	NA	NA	NA	NA	NA	NA	NA	NA
E9QIZ1;E7EXJ3	E9QIZ1;E7EXJ3	si:ch211-197h24.6	>tr|E9QIZ1|E9QIZ1_DANRE Si:ch211-197h24.6 OS=Danio rerio GN=si:ch211-197h24.6 PE=4 SV=1;>tr|E7EXJ3|E7EXJ3_DANRE Si:ch211-197h24.6 OS=Danio rerio GN=OTTDARG00000033334 PE=4 SV=1	2	11	26.3	5.6817e-28	NA	NA	NA	NA	NA	NA	82752000	62438000	72994000	NA	NA	NA
E9QJJ0;Q7SXQ1	E9QJJ0;Q7SXQ1	tial1	>tr|E9QJJ0|E9QJJ0_DANRE TIA1 cytotoxic granule-associated RNA-binding protein-like 1 OS=Danio rerio GN=tial1 PE=4 SV=1;>tr|Q7SXQ1|Q7SXQ1_DANRE TIA1 cytotoxic granule-associated RNA binding protein-like 1 OS=Danio rerio GN=tial1 PE=2 SV=1	2	11	29.8	1.1688e-280	267040000	277310000	NA	NA	NA	41555000	209090000	127740000	135940000	NA	NA	NA
F1Q4U5;F1QVB0	F1Q4U5	xrn1	>tr|F1Q4U5|F1Q4U5_DANRE 5-3 exoribonuclease 1 OS=Danio rerio GN=xrn1 PE=4 SV=1	2	8	6.3	1.2707e-19	NA	NA	NA	NA	NA	NA	18221000	19023000	22779000	NA	NA	NA
F1Q4V2	F1Q4V2		>tr|F1Q4V2|F1Q4V2_DANRE Uncharacterized protein OS=Danio rerio PE=4 SV=1	1	2	5	2.7081e-86	NA	NA	685100000	NA	NA	NA	NA	NA	NA	NA	NA	NA
F1Q4Z8;F8W4V6	F1Q4Z8;F8W4V6	grsf1	>tr|F1Q4Z8|F1Q4Z8_DANRE G-rich RNA sequence-binding factor 1 OS=Danio rerio GN=grsf1 PE=4 SV=1;>tr|F8W4V6|F8W4V6_DANRE G-rich RNA sequence-binding factor 1 OS=Danio rerio GN=grsf1 PE=4 SV=1	2	3	9.5	2.4046e-08	19609000	21087000	NA	NA	NA	NA	NA	NA	NA	NA	NA	NA
F1RAU0;F1Q5D5;E9QI36;Q66HY3	F1RAU0;F1Q5D5;E9QI36;Q66HY3	hars	>tr|F1RAU0|F1RAU0_DANRE Histidyl-tRNA synthetase (Fragment) OS=Danio rerio GN=hars PE=3 SV=1;>tr|F1Q5D5|F1Q5D5_DANRE Histidyl-tRNA synthetase OS=Danio rerio GN=hars PE=3 SV=1;>tr|E9QI36|E9QI36_DANRE Histidyl-tRNA synthetase OS=Danio rerio GN=hars PE=3 SV=1	4	2	4.5	0.00052034	NA	NA	NA	NA	NA	NA	NA	NA	NA	8635400	NA	NA
Q6NWH7;F1RBJ8;F1Q5L6;B0JZJ1;E9QG17;F1QBS1	Q6NWH7;F1RBJ8;F1Q5L6;B0JZJ1	ddx5	>tr|Q6NWH7|Q6NWH7_DANRE DEAD (Asp-Glu-Ala-Asp) box polypeptide 5 OS=Danio rerio GN=ddx5 PE=2 SV=1;>tr|F1RBJ8|F1RBJ8_DANRE DEAD (Asp-Glu-Ala-Asp) box polypeptide 5 OS=Danio rerio GN=ddx5 PE=3 SV=1;>tr|F1Q5L6|F1Q5L6_DANRE DEAD (Asp-Glu-Ala-Asp) box polypepti	6	12	24.6	1.6487e-40	49303000	48668000	47843000	NA	NA	NA	197780000	135120000	100270000	NA	NA	NA
Q802Z9;F1Q5Q3;E7EYQ0	Q802Z9;F1Q5Q3	serbp1a	>tr|Q802Z9|Q802Z9_DANRE SERPINE1 mRNA binding protein 1 OS=Danio rerio GN=serbp1 PE=2 SV=1;>tr|F1Q5Q3|F1Q5Q3_DANRE SERPINE1 mRNA-binding protein 1 OS=Danio rerio GN=serbp1 PE=4 SV=1	3	5	18.4	4.0106e-33	NA	NA	NA	NA	NA	NA	NA	NA	57836000	NA	NA	NA
F1Q5V2;F1QSY3	F1Q5V2;F1QSY3	api5	>tr|F1Q5V2|F1Q5V2_DANRE Apoptosis inhibitor 5 OS=Danio rerio GN=api5 PE=4 SV=1;>tr|F1QSY3|F1QSY3_DANRE Apoptosis inhibitor 5 OS=Danio rerio GN=api5 PE=4 SV=1	2	4	7.4	1.6994e-09	NA	NA	NA	NA	NA	NA	72166000	77792000	42770000	NA	NA	NA
F1Q618;B8K0C7;F1QMN6	F1Q618	si:ch1073-335m2.2	>tr|F1Q618|F1Q618_DANRE Si:ch1073-335m2.2 OS=Danio rerio GN=si:ch1073-335m2.2 PE=4 SV=1	3	19	8.4	1.2163e-93	NA	NA	NA	NA	NA	NA	89382000	94880000	172720000	NA	NA	NA
Q6NXA4;F1Q6Y7;F1QDH0;F1QU46;E9QBB9;F8W5B1;F1R548;A4QN46;F1QB35	Q6NXA4;F1Q6Y7	ilf3;ilf3b	>sp|Q6NXA4|ILF3_DANRE Interleukin enhancer-binding factor 3 homolog OS=Danio rerio GN=ilf3 PE=1 SV=2;>tr|F1Q6Y7|F1Q6Y7_DANRE Interleukin enhancer-binding factor 3b OS=Danio rerio GN=ilf3b PE=4 SV=1	9	24	32.8	1.4954e-241	349080000	265530000	417170000	NA	NA	NA	864980000	577050000	667290000	NA	NA	NA
F1Q6Z5;E9QBN6	F1Q6Z5;E9QBN6	cnbpa	>tr|F1Q6Z5|F1Q6Z5_DANRE Zinc finger protein 9 OS=Danio rerio GN=zff9 PE=4 SV=1;>tr|E9QBN6|E9QBN6_DANRE Zinc finger protein 9 OS=Danio rerio GN=zff9 PE=4 SV=1	2	7	49.1	4.905e-150	320800000	406940000	453030000	NA	NA	NA	726940000	530380000	916410000	NA	NA	NA
Q6IQB1;F1Q743;Q7ZUI0	Q6IQB1;F1Q743;Q7ZUI0	rpl5b;rpl5a	>tr|Q6IQB1|Q6IQB1_DANRE Ribosomal protein L5b OS=Danio rerio GN=rpl5b PE=2 SV=1;>tr|F1Q743|F1Q743_DANRE Ribosomal protein L5b OS=Danio rerio GN=rpl5b PE=3 SV=1;>tr|Q7ZUI0|Q7ZUI0_DANRE Ribosomal protein L5a OS=Danio rerio GN=rpl5a PE=2 SV=1	3	3	11.8	1.2295e-05	NA	NA	NA	NA	NA	NA	32011000	NA	NA	NA	NA	NA
F1Q7F1;A5PMI5	F1Q7F1;A5PMI5	papd7	>tr|F1Q7F1|F1Q7F1_DANRE PAP-associated domain-containing 7 OS=Danio rerio GN=papd7 PE=4 SV=1;>tr|A5PMI5|A5PMI5_DANRE Novel protein similar to vertebrate polymerase (DNA directed) sigma (POLS) (Fragment) OS=Danio rerio GN=papd7 PE=4 SV=1	2	11	16.1	4.2761e-33	129030000	113630000	89661000	10736000	26844000	NA	123560000	76360000	76107000	NA	NA	NA
F1Q7F8	F1Q7F8	rbm4.2	>tr|F1Q7F8|F1Q7F8_DANRE RNA binding motif protein 4.2 OS=Danio rerio GN=rbm4.2 PE=4 SV=1	1	16	45.8	5.345e-163	221100000	302360000	343680000	NA	NA	NA	451200000	367590000	665920000	NA	NA	NA
F1Q7H5	F1Q7H5	zgc:173770	>tr|F1Q7H5|F1Q7H5_DANRE Zgc:173770 (Fragment) OS=Danio rerio GN=zgc:173770 PE=4 SV=1	1	5	21.3	8.4079e-205	NA	NA	1587200000	NA	NA	NA	NA	NA	NA	NA	NA	NA
F1Q7H6	F1Q7H6	nxf1	>tr|F1Q7H6|F1Q7H6_DANRE Nuclear RNA export factor 1 OS=Danio rerio GN=nxf1 PE=4 SV=1	1	3	5.6	5.318e-05	8494300	8719700	NA	NA	NA	NA	NA	NA	NA	NA	NA	NA
F1R887;F1Q7L0;F1RBA0	F1R887;F1Q7L0;F1RBA0	vtg4	>tr|F1R887|F1R887_DANRE Vitellogenin 4 OS=Danio rerio GN=vtg4 PE=4 SV=1;>tr|F1Q7L0|F1Q7L0_DANRE Vitellogenin 4 (Fragment) OS=Danio rerio GN=vtg4 PE=4 SV=1;>tr|F1RBA0|F1RBA0_DANRE Vitellogenin 4 OS=Danio rerio GN=vtg4 PE=4 SV=1	3	66	52.1	0	57440000	385560000	128350000	12505000	40477000	NA	1575800000	355910000	252850000	NA	306170000	179640000
F1Q898;F1R1G0	F1Q898	lsm14b	>tr|F1Q898|F1Q898_DANRE LSM14B, SCD6 homolog B (S. cerevisiae) OS=Danio rerio GN=lsm14b PE=4 SV=1	2	22	62.9	0	2296000000	2352700000	1929600000	16816000	67403000	96433000	7181700000	4654200000	5181000000	NA	305070000	143040000
F1Q8A5	F1Q8A5	hnrnpd	>tr|F1Q8A5|F1Q8A5_DANRE Heterogeneous nuclear ribonucleoprotein D OS=Danio rerio GN=hnrnpd PE=4 SV=1	1	11	28	3.2241e-92	1217800000	1188200000	839740000	NA	17733000	NA	883700000	905660000	1038800000	NA	NA	NA
F1R183;F1Q8G3;F1QZF7;A5PL92	F1R183;F1Q8G3	eif4bb	>tr|F1R183|F1R183_DANRE Eukaryotic translation initiation factor 4Bb OS=Danio rerio GN=eif4bb PE=4 SV=1;>tr|F1Q8G3|F1Q8G3_DANRE Eukaryotic translation initiation factor 4Bb OS=Danio rerio GN=eif4bb PE=4 SV=1	4	18	30.1	1.3793e-164	150170000	97138000	362060000	NA	NA	NA	168290000	148200000	465660000	NA	NA	NA
F1Q8M1	F1Q8M1		>tr|F1Q8M1|F1Q8M1_DANRE Si:ch211-250e5.3 (Fragment) OS=Danio rerio GN=si:ch211-250e5.3 PE=4 SV=1	1	3	22.8	5.4454e-08	NA	NA	23775000	NA	NA	NA	NA	NA	NA	NA	NA	NA
F1Q931	F1Q931	larp1b	>tr|F1Q931|F1Q931_DANRE Wu:fc76b04 OS=Danio rerio GN=wu:fc76b04 PE=4 SV=1	1	8	9.2	9.1954e-45	34269000	31231000	36586000	NA	NA	NA	56345000	49214000	36256000	NA	NA	NA
F1Q949	F1Q949	cpsf4	>tr|F1Q949|F1Q949_DANRE Uncharacterized protein OS=Danio rerio PE=4 SV=1	1	5	27.7	3.5911e-24	41954000	32931000	NA	NA	NA	NA	32601000	NA	19520000	NA	NA	NA
F1Q9D1	F1Q9D1	alyref	>tr|F1Q9D1|F1Q9D1_DANRE Uncharacterized protein OS=Danio rerio PE=4 SV=1	1	8	30.7	0	50199000	103630000	103210000	NA	NA	NA	362390000	385340000	274970000	NA	NA	NA
F1Q9T9;F1QGI3	F1Q9T9;F1QGI3	rpl23a	>tr|F1Q9T9|F1Q9T9_DANRE Ribosomal protein L23a (Fragment) OS=Danio rerio GN=rpl23a PE=3 SV=1;>tr|F1QGI3|F1QGI3_DANRE Ribosomal protein L23a OS=Danio rerio GN=rpl23a PE=3 SV=1	2	3	22.4	1.5528e-07	22473000	44359000	NA	NA	22062000	24325000	NA	NA	NA	NA	NA	NA
F1QSX5;F1QA42	F1QSX5;F1QA42	atxn2l	>tr|F1QSX5|F1QSX5_DANRE Ataxin 2-like OS=Danio rerio GN=atxn2l PE=4 SV=1;>tr|F1QA42|F1QA42_DANRE Ataxin 2-like OS=Danio rerio GN=atxn2l PE=4 SV=1	2	14	17.9	6.4291e-99	88500000	44313000	NA	NA	NA	NA	90642000	175320000	108300000	NA	NA	NA
F1QAM8;F1QT60;B8A534;B8A615;F1RDW6;F1QT82;E7F8N7;Q502B1;F1Q769;F1Q8F1;F1R8W4;F1QK59;A2ATX5;F1QCQ9;F1R8W3;E7F5E2;B3DI58;F1RA80;E7F9E8;B0R1B8;E9QFD5;F1Q765;A9JRG7;F1QCR7;F1Q5R6	F1QAM8;F1QT60	vim;viml	>tr|F1QAM8|F1QAM8_DANRE Vimentin OS=Danio rerio GN=vim PE=3 SV=1;>tr|F1QT60|F1QT60_DANRE Zgc:73275 OS=Danio rerio GN=zgc:73275 PE=3 SV=1	25	4	6.8	2.413e-11	NA	NA	NA	5470100	NA	NA	NA	NA	NA	NA	NA	NA
F1QAR1;F1QH55	F1QAR1;F1QH55	zc3h7a	>tr|F1QAR1|F1QAR1_DANRE Zinc finger CCCH-type-containing 7A (Fragment) OS=Danio rerio GN=zc3h7a PE=4 SV=1;>tr|F1QH55|F1QH55_DANRE Zinc finger CCCH-type-containing 7A OS=Danio rerio GN=zc3h7a PE=4 SV=1	2	8	8.9	5.1558e-16	NA	NA	NA	NA	NA	NA	34493000	38634000	68677000	NA	NA	NA
F1QJ44;F1QAW2;F1QSJ7	F1QJ44;F1QAW2;F1QSJ7	zgc:56304	>tr|F1QJ44|F1QJ44_DANRE Zgc:56304 (Fragment) OS=Danio rerio GN=zgc:56304 PE=4 SV=1;>tr|F1QAW2|F1QAW2_DANRE Zgc:56304 (Fragment) OS=Danio rerio GN=zgc:56304 PE=4 SV=1;>tr|F1QSJ7|F1QSJ7_DANRE Zgc:56304 (Fragment) OS=Danio rerio GN=zgc:56304 PE=4 SV=1	3	12	33.5	9.9238e-65	93248000	63731000	100080000	NA	NA	NA	106040000	97759000	473590000	NA	NA	NA
F1QAY0	F1QAY0	raly	>tr|F1QAY0|F1QAY0_DANRE RNA binding protein, autoantigenic (hnRNP-associated with lethal yellow homolog (mouse)) OS=Danio rerio GN=raly PE=4 SV=1	1	3	11.7	1.9439e-07	NA	NA	NA	NA	NA	NA	36627000	25230000	29473000	NA	NA	NA
F1QB47;F1R7P2	F1QB47;F1R7P2	eif5b	>tr|F1QB47|F1QB47_DANRE Si:ch211-254d18.3 OS=Danio rerio GN=si:ch211-254d18.3 PE=4 SV=1;>tr|F1R7P2|F1R7P2_DANRE Si:ch211-254d18.3 (Fragment) OS=Danio rerio GN=si:ch211-254d18.3 PE=4 SV=1	2	2	2	6.12e-05	NA	NA	NA	NA	NA	NA	NA	NA	4084500	NA	NA	NA
F1QB54	F1QB54	pabpc1a	>tr|F1QB54|F1QB54_DANRE Poly A binding protein, cytoplasmic 1 a OS=Danio rerio GN=pabpc1a PE=4 SV=1	1	34	59.1	0	2411500000	2186900000	1105500000	NA	6855300	22914000	3500100000	3196800000	2707200000	NA	24826000	NA
F1QJK4;F1QC64;F1R3G4	F1QJK4;F1QC64;F1R3G4	si:ch211-150d5.2;myh10	>tr|F1QJK4|F1QJK4_DANRE Si:ch211-150d5.2 OS=Danio rerio GN=si:ch211-150d5.2 PE=4 SV=2;>tr|F1QC64|F1QC64_DANRE Si:ch211-150d5.2 (Fragment) OS=Danio rerio GN=si:ch211-150d5.2 PE=4 SV=1;>tr|F1R3G4|F1R3G4_DANRE Myosin, heavy chain 10, non-muscle OS=Danio rerio	3	8	6.8	1.3882e-22	NA	NA	NA	12248000	13575000	12111000	NA	NA	NA	NA	NA	NA
F1QC84	F1QC84	f13a1a.1	>tr|F1QC84|F1QC84_DANRE Zgc:152982 OS=Danio rerio GN=zgc:152982 PE=4 SV=1	1	6	10.3	5.056e-30	NA	NA	427630000	NA	NA	NA	NA	NA	NA	NA	NA	NA
F1QCH1	F1QCH1	si:ch211-146l10.5	>tr|F1QCH1|F1QCH1_DANRE Si:ch211-146l10.5 OS=Danio rerio GN=si:ch211-146l10.5 PE=4 SV=1	1	6	15	7.5639e-128	NA	NA	677830000	NA	NA	NA	NA	NA	NA	NA	NA	NA
F1QCP1;F1R9E5	F1QCP1;F1R9E5	prrc2c	>tr|F1QCP1|F1QCP1_DANRE Si:ch211-191d7.6 OS=Danio rerio GN=si:ch211-191d7.6 PE=4 SV=1;>tr|F1R9E5|F1R9E5_DANRE Si:ch211-191d7.6 OS=Danio rerio GN=si:ch211-191d7.6 PE=4 SV=2	2	21	11.1	1.652e-69	NA	NA	NA	NA	NA	NA	73431000	46800000	125920000	NA	NA	NA
Q32LU7;F1QDD8	Q32LU7;F1QDD8	ptcd3	>sp|Q32LU7|PTCD3_DANRE Pentatricopeptide repeat-containing protein 3, mitochondrial OS=Danio rerio GN=ptcd3 PE=2 SV=1;>tr|F1QDD8|F1QDD8_DANRE Pentatricopeptide repeat domain 3 OS=Danio rerio GN=ptcd3 PE=4 SV=1	2	7	13.9	2.253e-60	103390000	72136000	70750000	NA	NA	NA	70266000	88062000	70500000	NA	NA	NA
F1QV64;F1QDR0	F1QV64;F1QDR0	ubap2	>tr|F1QV64|F1QV64_DANRE Ubiquitin-associated protein 2 OS=Danio rerio GN=ubap2 PE=4 SV=1;>tr|F1QDR0|F1QDR0_DANRE Ubiquitin associated protein 2 OS=Danio rerio GN=ubap2 PE=4 SV=1	2	2	2	0.00011812	NA	NA	NA	NA	NA	NA	NA	13709000	27264000	NA	NA	NA
F8W3U8;F1R6M3;Q8QGG8;F1QES3;F8W4P0;F1QSP5;E7EZA2	F8W3U8;F1R6M3;Q8QGG8;F1QES3;F8W4P0;F1QSP5;E7EZA2	vasa	>tr|F8W3U8|F8W3U8_DANRE Vasa homolog OS=Danio rerio GN=vasa PE=3 SV=1;>tr|F1R6M3|F1R6M3_DANRE Vasa homolog OS=Danio rerio GN=vasa PE=3 SV=1;>tr|Q8QGG8|Q8QGG8_DANRE Vasa homolog OS=Danio rerio GN=vasa PE=2 SV=1;>tr|F1QES3|F1QES3_DANRE Vasa homolog OS=Danio	7	6	10.9	2.0687e-16	NA	NA	NA	NA	NA	NA	16530000	14462000	7456800	NA	NA	NA
F1QF96;F1QYE1	F1QF96;F1QYE1	r3hdm1	>tr|F1QF96|F1QF96_DANRE Uncharacterized protein (Fragment) OS=Danio rerio PE=4 SV=1;>tr|F1QYE1|F1QYE1_DANRE Uncharacterized protein (Fragment) OS=Danio rerio PE=4 SV=1	2	8	10.4	2.2027e-28	75559000	44493000	NA	NA	NA	NA	49552000	39801000	51188000	NA	NA	NA
F1QFJ8	F1QFJ8	hnrnph1l	>tr|F1QFJ8|F1QFJ8_DANRE Heterogeneous nuclear ribonucleoprotein H1,-like OS=Danio rerio GN=hnrnph1l PE=4 SV=1	1	11	43.5	0	1516100000	1142800000	987140000	NA	7634400	7158900	1461800000	1717200000	980730000	NA	417510000	127630000
F1QFV2;F1QS20;F1R2T6;F1R4I4	F1QFV2	hnrnpa1	>tr|F1QFV2|F1QFV2_DANRE Heterogeneous nuclear ribonucleoprotein A1 OS=Danio rerio GN=hnrnpa1 PE=4 SV=1	4	18	43.9	0	336410000	228300000	60880000	NA	14899000	NA	267660000	367930000	940810000	NA	140910000	NA
F1QFV6	F1QFV6	rpl28	>tr|F1QFV6|F1QFV6_DANRE Ribosomal protein L28 OS=Danio rerio GN=rpl28 PE=4 SV=1	1	5	34.1	8.0754e-59	NA	NA	NA	NA	NA	NA	902890000	462760000	412870000	NA	NA	NA
F1QG05;Q5BLD6	F1QG05	ptbp2a	>tr|F1QG05|F1QG05_DANRE Uncharacterized protein OS=Danio rerio PE=4 SV=1	2	15	37.9	2.0569e-157	286880000	295690000	194550000	NA	NA	NA	810700000	352750000	567880000	104790000	88090000	NA
F1QG80	F1QG80	rpl22	>tr|F1QG80|F1QG80_DANRE Zgc:123327 OS=Danio rerio GN=zgc:123327 PE=4 SV=1	1	3	27	5.6203e-29	285390000	345950000	177780000	NA	NA	NA	150740000	211390000	96846000	NA	NA	NA
F1QGH7;F1QYT6;E7FC99;F8W436	F1QGH7;F1QYT6;E7FC99	ctnnb1	>tr|F1QGH7|F1QGH7_DANRE Catenin (cadherin-associated protein), beta 1 OS=Danio rerio GN=ctnnb1 PE=4 SV=1;>tr|F1QYT6|F1QYT6_DANRE Uncharacterized protein (Fragment) OS=Danio rerio PE=4 SV=1;>tr|E7FC99|E7FC99_DANRE Uncharacterized protein OS=Danio rerio PE=4	4	4	7.7	2.9633e-73	34773000	41014000	NA	44103000	49179000	62668000	NA	NA	NA	200220000	23889000	NA
F1QGS2	F1QGS2		>tr|F1QGS2|F1QGS2_DANRE Uncharacterized protein (Fragment) OS=Danio rerio PE=4 SV=1	1	3	8.8	1.342e-13	NA	NA	NA	NA	NA	NA	NA	NA	19628000	NA	NA	NA
F1QHE7	F1QHE7	otud4	>tr|F1QHE7|F1QHE7_DANRE OTU domain-containing 4 OS=Danio rerio GN=otud4 PE=4 SV=1	1	2	7.5	6.7543e-32	NA	NA	NA	NA	NA	NA	NA	NA	9107200	NA	NA	NA
F1QHJ1	F1QHJ1	rps26l	>tr|F1QHJ1|F1QHJ1_DANRE Ribosomal protein S26,-like OS=Danio rerio GN=rps26l PE=4 SV=1	1	4	34.8	3.4353e-64	502790000	410630000	NA	NA	NA	104030000	616010000	424450000	740080000	NA	NA	NA
F1QIP2	F1QIP2	zgc:55733	>tr|F1QIP2|F1QIP2_DANRE Zgc:55733 OS=Danio rerio GN=zgc:55733 PE=4 SV=1	1	20	55.2	3.548e-189	1828900000	1703500000	2233600000	NA	NA	NA	2506200000	2661300000	2642000000	NA	1845700000	NA
F1QUS3;F1QQQ7;F1R003;F1QMZ0;F1QJ26;F1QNI8	F1QUS3;F1QQQ7;F1R003;F1QMZ0;F1QJ26;F1QNI8	zp2.5;zp2.2;zp2;zp2.3;zp2.6	>tr|F1QUS3|F1QUS3_DANRE Zona pellucida glycoprotein 2.5 OS=Danio rerio GN=zp2.5 PE=4 SV=1;>tr|F1QQQ7|F1QQQ7_DANRE Zona pellucida glycoprotein 2.2 OS=Danio rerio GN=zp2.2 PE=4 SV=1;>tr|F1R003|F1R003_DANRE Zona pellucida glycoprotein 2 OS=Danio rerio GN=zp2	6	10	23.4	3.3013e-204	NA	386140000	2734900000	NA	NA	NA	NA	NA	NA	NA	NA	NA
Q7ZW47;F1QJT6;F1QTC1;F1Q5V4;E9QIB8	Q7ZW47;F1QJT6	stau2	>sp|Q7ZW47|STAU2_DANRE Double-stranded RNA-binding protein Staufen homolog 2 OS=Danio rerio GN=stau2 PE=2 SV=2;>tr|F1QJT6|F1QJT6_DANRE Staufen, RNA binding protein, homolog 2 (Drosophila) OS=Danio rerio GN=stau2 PE=4 SV=1	5	27	50.2	0	771320000	345260000	224970000	NA	4314600	11143000	1756700000	1295200000	1229000000	NA	NA	NA
F1QKB8;Q1LX57;Q1LX58	F1QKB8	si:dkey-24l11.3	>tr|F1QKB8|F1QKB8_DANRE Si:dkey-24l11.3 OS=Danio rerio GN=si:dkey-24l11.3 PE=4 SV=1	3	8	12.2	4.3924e-21	89912000	78901000	147620000	NA	NA	NA	117160000	125610000	124340000	NA	NA	NA
F1QKG2;E9QFI7	F1QKG2	ptbp1b	>tr|F1QKG2|F1QKG2_DANRE Polypyrimidine tract-binding protein 1b OS=Danio rerio GN=ptbp1b PE=4 SV=1	2	6	10.5	7.5364e-29	NA	NA	34694000	NA	NA	NA	NA	NA	NA	NA	NA	NA
F1QL40	F1QL40	ctsc	>tr|F1QL40|F1QL40_DANRE Cathepsin C OS=Danio rerio GN=ctsc PE=3 SV=1	1	2	4.4	5.0765e-239	NA	NA	NA	NA	NA	NA	NA	68821000	5210600	NA	NA	NA
F1QLR3;F1QLR2;F8W4G8	F1QLR3;F1QLR2;F8W4G8	fxr1	>tr|F1QLR3|F1QLR3_DANRE Fragile X mental retardation, autosomal homolog 1 OS=Danio rerio GN=fxr1 PE=4 SV=1;>tr|F1QLR2|F1QLR2_DANRE Fragile X mental retardation, autosomal homolog 1 OS=Danio rerio GN=fxr1 PE=4 SV=1;>tr|F8W4G8|F8W4G8_DANRE Fragile X mental r	3	5	8.7	7.9929e-16	17741000	NA	NA	NA	NA	NA	13947000	13833000	23127000	NA	NA	NA
F1QLU3;F1QRS6;Q803J4;F1RCV7;E9QCG8;E9QCK8	F1QLU3;F1QRS6;Q803J4;F1RCV7;E9QCG8	hnrnpc	>tr|F1QLU3|F1QLU3_DANRE Uncharacterized protein OS=Danio rerio PE=4 SV=1;>tr|F1QRS6|F1QRS6_DANRE Uncharacterized protein OS=Danio rerio PE=4 SV=1;>tr|Q803J4|Q803J4_DANRE Uncharacterized protein OS=Danio rerio GN=zgc:55701 PE=2 SV=1;>tr|F1RCV7|F1RCV7_DANRE	6	22	50.5	0	13968000000	13568000000	13314000000	1955900	7808800	5990800	16875000000	15282000000	16648000000	NA	610140000	10882000
F1QLY5;F1RA69	F1QLY5;F1RA69	zgc:165539	>tr|F1QLY5|F1QLY5_DANRE Zgc:165539 OS=Danio rerio GN=zgc:165539 PE=4 SV=1;>tr|F1RA69|F1RA69_DANRE Zgc:165539 OS=Danio rerio GN=zgc:165539 PE=4 SV=1	2	2	8.3	3.7592e-73	NA	NA	69847000	NA	NA	NA	NA	NA	NA	NA	NA	NA
F1QMG1	F1QMG1	mrpl1	>tr|F1QMG1|F1QMG1_DANRE Si:dkey-58f10.1 (Fragment) OS=Danio rerio GN=si:dkey-58f10.1 PE=4 SV=1	1	2	6.8	1.4303e-05	NA	NA	NA	NA	NA	NA	NA	63524000	NA	NA	NA	NA
F1QML8	F1QML8	akap8l	>tr|F1QML8|F1QML8_DANRE A kinase (PRKA) anchor protein 8-like OS=Danio rerio GN=akap8l PE=4 SV=1	1	15	29.9	3.0415e-75	94118000	175400000	104520000	NA	NA	NA	164150000	129750000	153850000	NA	NA	NA
F1QNX4;A5WV27	F1QNX4	top3b	>tr|F1QNX4|F1QNX4_DANRE DNA topoisomerase OS=Danio rerio GN=top3b PE=3 SV=1	2	16	20.5	3.3651e-56	84625000	60795000	69410000	21877000	88568000	83914000	NA	76037000	60838000	NA	NA	NA
F1QPI0	F1QPI0	LOC566119	>tr|F1QPI0|F1QPI0_DANRE Uncharacterized protein (Fragment) OS=Danio rerio PE=4 SV=1	1	2	10.8	0.00010079	NA	NA	39037000	NA	NA	NA	NA	NA	NA	NA	NA	NA
F1QQ28;F1R2E7	F1QQ28	eif4h	>tr|F1QQ28|F1QQ28_DANRE Eukaryotic translation initiation factor 4h OS=Danio rerio GN=eif4h PE=4 SV=1	2	12	51.5	0	407310000	263160000	352840000	NA	NA	NA	697640000	795870000	1693900000	NA	NA	NA
F1QQK6	F1QQK6	zgc:152652	>tr|F1QQK6|F1QQK6_DANRE Zgc:152652 OS=Danio rerio GN=zgc:152652 PE=4 SV=1	1	3	6.2	8.6634e-36	NA	NA	64169000	NA	NA	NA	NA	NA	NA	NA	NA	NA
F1QQQ3;F1QPC0	F1QQQ3	vtg3	>tr|F1QQQ3|F1QQQ3_DANRE Vitellogenin 3, phosvitinless (Fragment) OS=Danio rerio GN=vtg3 PE=4 SV=1	2	7	6.7	4.5914e-27	NA	NA	NA	NA	NA	NA	167640000	39576000	55468000	NA	NA	NA
F1QXA5;F1QQX8	F1QXA5;F1QQX8	zgc:171750	>tr|F1QXA5|F1QXA5_DANRE Zgc:171750 OS=Danio rerio GN=zgc:171750 PE=4 SV=1;>tr|F1QQX8|F1QQX8_DANRE Zgc:171750 (Fragment) OS=Danio rerio GN=zgc:171750 PE=4 SV=1	2	3	6	1.1249e-31	NA	NA	287710000	NA	NA	NA	NA	NA	NA	NA	NA	NA
F1QRD4;Q66HY6	F1QRD4;Q66HY6	ncoa5	>tr|F1QRD4|F1QRD4_DANRE Zgc:92194 OS=Danio rerio GN=zgc:92194 PE=4 SV=1;>tr|Q66HY6|Q66HY6_DANRE Zgc:92194 OS=Danio rerio GN=zgc:92194 PE=2 SV=1	2	10	17.8	4.1688e-28	93310000	44467000	76078000	NA	NA	NA	113790000	99692000	99555000	NA	NA	NA
F1QRL9	F1QRL9	sf3a3	>tr|F1QRL9|F1QRL9_DANRE Splicing factor 3a, subunit 3 OS=Danio rerio GN=sf3a3 PE=4 SV=1	1	2	2	0.00051006	NA	38000000	NA	NA	NA	NA	NA	NA	NA	NA	NA	NA
F1QS28	F1QS28	hnrnpa0a	>tr|F1QS28|F1QS28_DANRE Zgc:77366 OS=Danio rerio GN=zgc:77366 PE=4 SV=1	1	10	35.4	2.1415e-239	263740000	527420000	420010000	NA	NA	6621400	420400000	440610000	788180000	NA	53665000	NA
F1QTL9;F8W265	F1QTL9;F8W265	hnrnpa0b	>tr|F1QTL9|F1QTL9_DANRE Heterogeneous nuclear ribonucleoprotein A0 OS=Danio rerio GN=hnrnpa0 PE=4 SV=1;>tr|F8W265|F8W265_DANRE Heterogeneous nuclear ribonucleoprotein A0 (Fragment) OS=Danio rerio GN=hnrnpa0 PE=4 SV=1	2	9	35.4	0	1167700000	819660000	482160000	8041400	13757000	8048600	1779100000	1346200000	2644700000	NA	571670000	127120000
F1RCD8;F1QTT5;F1RD28;E9QG77;E9QIA1	F1RCD8;F1QTT5;F1RD28;E9QG77;E9QIA1	zgc:66313;zgc:92137	>tr|F1RCD8|F1RCD8_DANRE Zgc:66313 OS=Danio rerio GN=zgc:66313 PE=3 SV=1;>tr|F1QTT5|F1QTT5_DANRE Zgc:92137 OS=Danio rerio GN=zgc:92137 PE=3 SV=1;>tr|F1RD28|F1RD28_DANRE Zgc:66313 OS=Danio rerio GN=zgc:66313 PE=3 SV=1;>tr|E9QG77|E9QG77_DANRE Zgc:66313 OS=Dan	5	2	5.5	9.2719e-13	48924000	37885000	NA	146130000	153070000	42205000	NA	29899000	75733000	NA	NA	NA
F1QTW6;F1R2S5;F1QHH9	F1QTW6;F1R2S5	vtg5	>tr|F1QTW6|F1QTW6_DANRE Vitellogenin 5 OS=Danio rerio GN=vtg5 PE=4 SV=1;>tr|F1R2S5|F1R2S5_DANRE Vitellogenin 5 (Fragment) OS=Danio rerio GN=vtg5 PE=4 SV=1	3	65	51.5	0	110240000	625610000	67854000	NA	NA	NA	1648400000	427450000	935580000	NA	NA	NA
F1QU69;E7FBM6	F1QU69;E7FBM6	mrps30;LOC100332353	>tr|F1QU69|F1QU69_DANRE Mitochondrial ribosomal protein S30 OS=Danio rerio GN=mrps30 PE=4 SV=1;>tr|E7FBM6|E7FBM6_DANRE Uncharacterized protein OS=Danio rerio PE=4 SV=1	2	3	8.1	6.9196e-07	NA	NA	NA	NA	NA	NA	NA	22281000	NA	NA	NA	NA
Q498Z6;F1QUB2	Q498Z6;F1QUB2	mrps7	>sp|Q498Z6|RT07_DANRE 28S ribosomal protein S7, mitochondrial OS=Danio rerio GN=mrps7 PE=2 SV=1;>tr|F1QUB2|F1QUB2_DANRE Mitochondrial ribosomal protein S7 OS=Danio rerio GN=mrps7 PE=4 SV=1	2	5	28.5	2.9799e-56	10364000	7716700	NA	NA	NA	NA	NA	NA	NA	NA	NA	NA
F1QUN9;F1QLE4	F1QUN9;F1QLE4	zgc:111868	>tr|F1QUN9|F1QUN9_DANRE Zgc:111868 OS=Danio rerio GN=zgc:111868 PE=4 SV=1;>tr|F1QLE4|F1QLE4_DANRE Zgc:111868 OS=Danio rerio GN=zgc:111868 PE=4 SV=1	2	7	12.4	6.6644e-62	NA	NA	420600000	NA	NA	NA	NA	NA	NA	NA	NA	NA
F8W4M8;F1QUV8;Q7ZWH9;E7EZA4;F1QTT3	F8W4M8;F1QUV8	jupb	>tr|F8W4M8|F8W4M8_DANRE Si:ch73-362f1.1 (Fragment) OS=Danio rerio GN=si:ch73-362f1.1 PE=4 SV=1;>tr|F1QUV8|F1QUV8_DANRE Si:ch73-362f1.1 (Fragment) OS=Danio rerio GN=si:ch73-362f1.1 PE=4 SV=1	5	3	5.7	2.4652e-26	84719000	NA	112180000	193670000	188340000	181490000	NA	NA	NA	213650000	147840000	NA
F1QV15;F1R992;F1R2S0	F1QV15	vtg6	>tr|F1QV15|F1QV15_DANRE Si:rp71-23d18.1 (Fragment) OS=Danio rerio GN=si:rp71-23d18.1 PE=4 SV=1	3	65	48.9	0	18354000	101430000	NA	NA	7230900	NA	474890000	200250000	252280000	NA	NA	NA
F1QVC6	F1QVC6	srsf9	>tr|F1QVC6|F1QVC6_DANRE Serine/arginine-rich splicing factor 9 OS=Danio rerio GN=srsf9 PE=4 SV=1	1	8	30.6	7.058e-20	52952000	58144000	NA	NA	NA	NA	63683000	66258000	72363000	NA	NA	NA
F1QWB4;B0UXJ3	F1QWB4;B0UXJ3	hnrnpk	>tr|F1QWB4|F1QWB4_DANRE Heterogeneous nuclear ribonucleoprotein K OS=Danio rerio GN=hnrnpk PE=4 SV=1;>tr|B0UXJ3|B0UXJ3_DANRE Heterogeneous nuclear ribonucleoprotein K (Fragment) OS=Danio rerio GN=hnrnpk PE=4 SV=1	2	16	45.5	6.6549e-123	187590000	146790000	345390000	NA	NA	NA	632670000	516020000	426900000	NA	NA	NA
F1QWP0;Q7ZUX2;F1QTG1	F1QWP0;Q7ZUX2	cstf2	>tr|F1QWP0|F1QWP0_DANRE Cleavage stimulation factor, 3 pre-RNA, subunit 2 OS=Danio rerio GN=cstf2 PE=4 SV=1;>tr|Q7ZUX2|Q7ZUX2_DANRE Cleavage stimulation factor, 3 pre-RNA, subunit 2 OS=Danio rerio GN=cstf2 PE=2 SV=1	3	6	14.1	2.5059e-22	NA	NA	NA	NA	NA	NA	150380000	67182000	90028000	NA	NA	NA
F5H8N4;F1QWU3;E7F6Q6	F5H8N4;F1QWU3	lrpprc	>tr|F5H8N4|F5H8N4_DANRE Leucine-rich PPR-motif-containing (Fragment) OS=Danio rerio GN=lrpprc PE=4 SV=1;>tr|F1QWU3|F1QWU3_DANRE Leucine-rich PPR-motif-containing OS=Danio rerio GN=lrpprc PE=4 SV=1	3	59	43.9	0	3573900000	3674500000	2819600000	1655800	8203600	8004400	2147200000	2229800000	2287600000	NA	23344000	NA
Q7SZ53;F1QXE9;A3KPH8;F1QXE4	Q7SZ53;F1QXE9;A3KPH8;F1QXE4	crp2;si:ch211-234p6.10	>tr|Q7SZ53|Q7SZ53_DANRE Novel protein (Wu:fi20c07) OS=Danio rerio GN=si:ch211-234p6.13 PE=2 SV=2;>tr|F1QXE9|F1QXE9_DANRE Si:ch211-234p6.13 OS=Danio rerio GN=si:ch211-234p6.13 PE=4 SV=1;>tr|A3KPH8|A3KPH8_DANRE Novel pentaxin family domain containing protein	4	2	10.4	5.3295e-05	NA	NA	NA	NA	NA	NA	36279000	21183000	21047000	NA	NA	NA
Q4KM14;F1QXG2	Q4KM14;F1QXG2	trnau1apl;trnau1apb	>sp|Q4KM14|TSP1L_DANRE tRNA selenocysteine 1-associated protein 1-like OS=Danio rerio GN=trnau1apl PE=2 SV=1;>tr|F1QXG2|F1QXG2_DANRE tRNA selenocysteine 1-associated protein 1,-like OS=Danio rerio GN=trnau1apl PE=4 SV=1	2	4	13	1.9105e-22	68650000	62706000	78201000	NA	NA	NA	NA	NA	114980000	NA	NA	NA
F1QXG4;Q5RGK8;Q7ZT42;Q7ZT42-2;Q7ZT42-3	F1QXG4;Q5RGK8;Q7ZT42;Q7ZT42-2;Q7ZT42-3	snd1	>tr|F1QXG4|F1QXG4_DANRE Staphylococcal nuclease domain-containing 1 OS=Danio rerio GN=snd1 PE=4 SV=1;>tr|Q5RGK8|Q5RGK8_DANRE Staphylococcal nuclease domain containing 1 OS=Danio rerio GN=snd1 PE=2 SV=2;>sp|Q7ZT42|SND1_DANRE Staphylococcal nuclease domain-c	5	31	36.2	3.6646e-231	449810000	284520000	743530000	NA	NA	NA	659950000	402000000	858100000	NA	137530000	NA
F1QXP8;H0WEH3	F1QXP8	khsrp	>tr|F1QXP8|F1QXP8_DANRE KH-type-splicing regulatory protein OS=Danio rerio GN=khsrp PE=4 SV=1	2	30	56.9	0	4246700000	4603300000	5045200000	3168900	NA	NA	6445000000	2387700000	7745300000	NA	85655000	NA
F1QXV8;E9QF19	F1QXV8;E9QF19	pgk1	>tr|F1QXV8|F1QXV8_DANRE Phosphoglycerate kinase OS=Danio rerio GN=pgk1 PE=3 SV=1;>tr|E9QF19|E9QF19_DANRE Phosphoglycerate kinase OS=Danio rerio GN=pgk1 PE=3 SV=1	2	2	7.9	1.4806e-05	NA	9195700	NA	NA	16160000	NA	NA	NA	NA	NA	NA	NA
Q6NUZ3;F1QY96;F6NN54	Q6NUZ3;F1QY96;F6NN54	syncrip	>tr|Q6NUZ3|Q6NUZ3_DANRE Synaptotagmin binding, cytoplasmic RNA interacting protein OS=Danio rerio GN=syncrip PE=2 SV=1;>tr|F1QY96|F1QY96_DANRE Synaptotagmin-binding, cytoplasmic RNA-interacting protein OS=Danio rerio GN=syncrip PE=4 SV=1;>tr|F6NN54|F6NN54_	3	17	32.2	0	923010000	833760000	203530000	34390000	65560000	58099000	871840000	1143300000	892710000	NA	229500000	NA
F1QYE3	F1QYE3	zgc:173556	>tr|F1QYE3|F1QYE3_DANRE Zgc:173556 OS=Danio rerio GN=zgc:173556 PE=4 SV=1	1	6	18.1	1.436e-14	NA	NA	80550000	NA	NA	NA	NA	NA	NA	NA	NA	NA
Q4QRJ7;F1QYG1	Q4QRJ7;F1QYG1	eif2a	>sp|Q4QRJ7|EIF2A_DANRE Eukaryotic translation initiation factor 2A OS=Danio rerio GN=eif2a PE=2 SV=1;>tr|F1QYG1|F1QYG1_DANRE Zgc:110460 OS=Danio rerio GN=zgc:110460 PE=4 SV=1	2	2	4.3	0.00088879	NA	2241300	NA	NA	NA	NA	NA	NA	NA	NA	NA	NA
F1QYU1;Q8JGR4	F1QYU1;Q8JGR4	rpl24	>tr|F1QYU1|F1QYU1_DANRE Ribosomal protein L24 (Fragment) OS=Danio rerio GN=rpl24 PE=4 SV=1;>sp|Q8JGR4|RL24_DANRE 60S ribosomal protein L24 OS=Danio rerio GN=rpl24 PE=2 SV=1	2	2	13.5	2.0966e-12	NA	NA	NA	NA	NA	NA	68756000	NA	NA	NA	NA	NA
F1QZC1	F1QZC1	rbfox2	>tr|F1QZC1|F1QZC1_DANRE RNA-binding protein, fox-1 homolog (C. elegans) 2 OS=Danio rerio GN=rbfox2 PE=4 SV=1	1	5	18.7	6.0084e-18	137740000	114900000	156790000	NA	NA	NA	245260000	155510000	180140000	NA	NA	NA
F1QZN1;F1QED0	F1QZN1;F1QED0	fubp3	>tr|F1QZN1|F1QZN1_DANRE Zgc:101598 (Fragment) OS=Danio rerio GN=zgc:101598 PE=4 SV=1;>tr|F1QED0|F1QED0_DANRE Zgc:101598 (Fragment) OS=Danio rerio GN=zgc:101598 PE=4 SV=1	2	13	48.7	0	1958000000	1928400000	2686900000	43993000	NA	5615700	4238100000	3111100000	3598400000	NA	NA	NA
F1R331;F1QZT4;F1RDM4	F1R331;F1QZT4	zgc:152816	>tr|F1R331|F1R331_DANRE Zgc:152816 OS=Danio rerio GN=zgc:152816 PE=4 SV=1;>tr|F1QZT4|F1QZT4_DANRE Zgc:152816 OS=Danio rerio GN=zgc:152816 PE=4 SV=1	3	15	22.5	4.5247e-180	149450000	144260000	367430000	NA	NA	NA	182600000	92135000	188200000	NA	NA	NA
F1QZW7;F1QRI4	F1QZW7	ilf3a	>tr|F1QZW7|F1QZW7_DANRE Interleukin enhancer binding factor 3a OS=Danio rerio GN=ilf3a PE=4 SV=1	2	20	31.5	3.0498e-187	66427000	83540000	64508000	NA	NA	NA	69142000	146300000	168720000	NA	NA	NA
F1R0U5	F1R0U5	larp1	>tr|F1R0U5|F1R0U5_DANRE La ribonucleoprotein domain family, member 1 OS=Danio rerio GN=larp1 PE=4 SV=1	1	7	8.7	7.2678e-156	NA	NA	NA	NA	NA	NA	69244000	74008000	88309000	NA	NA	NA
F1R0Y4;F1QLY3	F1R0Y4;F1QLY3	fam98a	>tr|F1R0Y4|F1R0Y4_DANRE Family with sequence similarity 98, member A (Fragment) OS=Danio rerio GN=fam98a PE=4 SV=1;>tr|F1QLY3|F1QLY3_DANRE Family with sequence similarity 98, member A (Fragment) OS=Danio rerio GN=fam98a PE=4 SV=1	2	3	8.7	2.5037e-43	27441000	25293000	NA	NA	NA	NA	NA	NA	NA	NA	NA	NA
F1R1A3	F1R1A3		>tr|F1R1A3|F1R1A3_DANRE Uncharacterized protein (Fragment) OS=Danio rerio PE=4 SV=1	1	3	11.8	9.4585e-10	NA	NA	NA	NA	NA	NA	NA	NA	9593500	NA	NA	NA
F1R2E0;E9QEE4;Q1LVZ5;F8W2D3	F1R2E0;E9QEE4	hnrnpm	>tr|F1R2E0|F1R2E0_DANRE Heterogeneous nuclear ribonucleoprotein M OS=Danio rerio GN=hnrnpm PE=4 SV=2;>tr|E9QEE4|E9QEE4_DANRE Heterogeneous nuclear ribonucleoprotein M OS=Danio rerio GN=hnrnpm PE=4 SV=1	4	34	57.2	0	1119700000	642890000	2095800000	NA	NA	17364000	1306400000	733490000	2638000000	236970000	NA	NA
Q1MTC6;F1R2T3;F1R743	Q1MTC6;F1R2T3	vtg7	>tr|Q1MTC6|Q1MTC6_DANRE Novel protein similar to vitellogenin 1 (Vg1) OS=Danio rerio GN=vtg7 PE=4 SV=1;>tr|F1R2T3|F1R2T3_DANRE Vitellogenin 7 OS=Danio rerio GN=vtg7 PE=4 SV=1	3	62	49.4	0	25321000	267020000	105820000	17715000	14960000	34873000	809420000	156680000	384480000	NA	533930000	184600000
F1R2U4;Q7SXN6;Q6DGY8;Q6GQM3	F1R2U4;Q7SXN6;Q6DGY8;Q6GQM3	psma6a;psma6b;psma6l	>tr|F1R2U4|F1R2U4_DANRE Proteasome subunit alpha type OS=Danio rerio GN=psma6a PE=3 SV=1;>tr|Q7SXN6|Q7SXN6_DANRE Proteasome subunit alpha type OS=Danio rerio GN=psma6a PE=2 SV=1;>tr|Q6DGY8|Q6DGY8_DANRE Proteasome subunit alpha type OS=Danio rerio GN=psma6b	4	2	9.5	4.3626e-06	13910000	15508000	NA	31131000	59369000	NA	NA	NA	NA	13755000	NA	NA
F1R2V7	F1R2V7	zgc:163069	>tr|F1R2V7|F1R2V7_DANRE ATP synthase subunit beta OS=Danio rerio GN=zgc:163069 PE=3 SV=1	1	3	6.4	2.3511e-05	NA	NA	33815000	NA	NA	NA	NA	NA	NA	NA	NA	NA
F1R368	F1R368	wu:fc56b07	>tr|F1R368|F1R368_DANRE Wu:fc56b07 (Fragment) OS=Danio rerio GN=wu:fc56b07 PE=4 SV=1	1	4	12.9	1.3464e-08	15076000	17420000	NA	NA	NA	NA	33291000	33862000	20757000	NA	NA	NA
F1R3J9;F1QFJ1	F1R3J9;F1QFJ1	prmt1	>tr|F1R3J9|F1R3J9_DANRE Protein arginine methyltransferase 1 OS=Danio rerio GN=prmt1 PE=4 SV=1;>tr|F1QFJ1|F1QFJ1_DANRE Protein arginine methyltransferase 1 (Fragment) OS=Danio rerio GN=prmt1 PE=4 SV=1	2	4	15.2	3.4922e-15	26949000	21060000	NA	NA	NA	NA	NA	NA	NA	NA	NA	NA
F1R3X6	F1R3X6	zgc:171977	>tr|F1R3X6|F1R3X6_DANRE Zgc:171977 OS=Danio rerio GN=zgc:171977 PE=4 SV=1	1	3	8.8	7.8763e-123	NA	NA	191630000	NA	NA	NA	NA	NA	NA	NA	NA	NA
F1R4G2	F1R4G2	blmh	>tr|F1R4G2|F1R4G2_DANRE Bleomycin hydrolase OS=Danio rerio GN=blmh PE=4 SV=1	1	2	4.9	4.3064e-05	NA	NA	NA	NA	NA	NA	NA	25472000	NA	NA	NA	NA
F1R4N4	F1R4N4	wu:fi38e01	>tr|F1R4N4|F1R4N4_DANRE Wu:fi38e01 OS=Danio rerio GN=wu:fi38e01 PE=4 SV=1	1	7	12	3.3149e-23	NA	NA	326220000	NA	NA	NA	NA	NA	NA	NA	NA	NA
Q6DGM3;F1R4Y4	Q6DGM3;F1R4Y4	mrpl15	>sp|Q6DGM3|RM15_DANRE 39S ribosomal protein L15, mitochondrial OS=Danio rerio GN=mrpl15 PE=2 SV=1;>tr|F1R4Y4|F1R4Y4_DANRE Mitochondrial ribosomal protein L15 OS=Danio rerio GN=mrpl15 PE=3 SV=1	2	2	7.4	0.00087017	NA	NA	NA	NA	NA	NA	45310000	NA	NA	NA	NA	NA
F1R6L2	F1R6L2	hip1	>tr|F1R6L2|F1R6L2_DANRE Huntingtin-interacting protein 1 OS=Danio rerio GN=hip1 PE=4 SV=1	1	2	1.6	0.00026305	NA	NA	NA	NA	NA	NA	NA	NA	37979000	49611000	NA	NA
F1R6L3;E7EYX7	F1R6L3;E7EYX7	cirbp	>tr|F1R6L3|F1R6L3_DANRE Cold-inducible RNA-binding protein (Fragment) OS=Danio rerio GN=cirbp PE=4 SV=1;>tr|E7EYX7|E7EYX7_DANRE Cold inducible RNA binding protein OS=Danio rerio GN=OTTDARG00000010532 PE=4 SV=1	2	12	48.2	0	11750000000	13638000000	16036000000	105640000	106410000	112060000	15005000000	11571000000	18139000000	NA	1378200000	1301400000
F1R6P0	F1R6P0	mrps5	>tr|F1R6P0|F1R6P0_DANRE Mitochondrial ribosomal protein S5 OS=Danio rerio GN=mrps5 PE=3 SV=1	1	2	5.8	2.9493e-08	NA	24059000	NA	NA	NA	NA	61927000	42827000	41962000	NA	NA	NA
F1R711	F1R711	zgc:173837	>tr|F1R711|F1R711_DANRE Zgc:173837 OS=Danio rerio GN=zgc:173837 PE=4 SV=1	1	5	33.7	2.7682e-117	NA	NA	400990000	NA	NA	NA	NA	NA	NA	NA	NA	NA
F1R8D7	F1R8D7	syncripl	>tr|F1R8D7|F1R8D7_DANRE Synaptotagmin-binding, cytoplasmic RNA-interacting protein,-like OS=Danio rerio GN=syncripl PE=4 SV=1	1	25	53	0	6418500000	8276000000	3464300000	268500000	370310000	322380000	5715900000	9986800000	8707800000	NA	4562100000	4330800000
F1R8M9	F1R8M9	zgc:173990	>tr|F1R8M9|F1R8M9_DANRE Zgc:173990 (Fragment) OS=Danio rerio GN=zgc:173990 PE=4 SV=1	1	5	23.4	1.409e-149	NA	NA	102470000	NA	NA	NA	NA	NA	NA	NA	NA	NA
F1RA95	F1RA95	prdx1	>tr|F1RA95|F1RA95_DANRE Uncharacterized protein OS=Danio rerio PE=4 SV=1	1	3	16.6	4.5086e-07	NA	NA	NA	NA	NA	NA	NA	NA	NA	57554000	NA	NA
F1RES4;F1RAU3	F1RES4;F1RAU3	zgc:173856	>tr|F1RES4|F1RES4_DANRE Zgc:173856 OS=Danio rerio GN=zgc:173856 PE=4 SV=1;>tr|F1RAU3|F1RAU3_DANRE Zgc:173856 OS=Danio rerio GN=zgc:173856 PE=4 SV=1	2	5	10	3.2163e-19	NA	NA	283250000	NA	NA	NA	NA	NA	NA	NA	NA	NA
F1RB48;Q4V8W2;E7FFV7	F1RB48;Q4V8W2;E7FFV7	mrpl44;agfg1a	>tr|F1RB48|F1RB48_DANRE Mitochondrial ribosomal protein L44 OS=Danio rerio GN=mrpl44 PE=4 SV=1;>tr|Q4V8W2|Q4V8W2_DANRE Mitochondrial ribosomal protein L44 OS=Danio rerio GN=mrpl44 PE=2 SV=1;>tr|E7FFV7|E7FFV7_DANRE ArfGAP with FG repeats 1a OS=Danio rerio G	3	2	9.9	2.6213e-07	NA	NA	NA	NA	NA	NA	NA	NA	6755300	NA	NA	NA
Q08BH5;F1RBR1;E7F6B7	Q08BH5;F1RBR1	rbm46	>sp|Q08BH5|RBM46_DANRE Probable RNA-binding protein 46 OS=Danio rerio GN=rbm46 PE=2 SV=1;>tr|F1RBR1|F1RBR1_DANRE RNA-binding motif protein 46 OS=Danio rerio GN=rbm46 PE=4 SV=1	3	4	7.3	1.1881e-07	NA	NA	NA	NA	NA	NA	18546000	17706000	19586000	NA	NA	NA
F1RCB2	F1RCB2	pl10	>tr|F1RCB2|F1RCB2_DANRE Pl10 OS=Danio rerio GN=pl10 PE=3 SV=1	1	43	67	0	3913700000	3021800000	3083600000	8798100	21569000	12239000	1743400000	2590800000	2441700000	3062200	83276000	NA
F1RCY6	F1RCY6	upf1	>tr|F1RCY6|F1RCY6_DANRE Upf1 regulator of nonsense transcripts homolog (yeast) OS=Danio rerio GN=upf1 PE=4 SV=1	1	26	31.2	4.4826e-145	261890000	415480000	115560000	12171000	15574000	NA	196280000	240390000	187620000	NA	NA	NA
F1RCY7	F1RCY7	rbm15	>tr|F1RCY7|F1RCY7_DANRE RNA-binding motif protein 15 (Fragment) OS=Danio rerio GN=rbm15 PE=4 SV=1	1	2	2.8	0.00039943	NA	3421000	NA	NA	NA	NA	NA	NA	NA	NA	NA	NA
F1RD83;H0WF90;H0WEW6;H0WEQ0;H0WE45;H0WF51;H0WEY6;H0WE68;H0WEU4;H0WFA4;H0WEG2;E9QEC5;E7F8C9;E9QE58;H0WEF7;E9QBK3;F1Q6G9;E9QG62;E9QJL1;E9QIH2;F1R3J3;F1QIE7;F1QAQ0;E9QJQ7;E9QJQ1;E9QJK7;E9QIQ1;E9QHY0;E9QFH7;E9QDM3;E9QBC7;E9QB81;E7EY98;F1Q7M0;E9QGS2;E9QEH9;E9QEF4;E9QC11;E9QI52;H0WF07;E7F6W9;H0WFF7;H0WEP1;H0WEH7;E7F3E4;H0WF72;H0WEG4;E7FEX8;E7F6E3;E9QBY5;F1RDU9;F1Q7M2;E9QI64;E9QBT2;H0WFG2;H0WEU7;H0WES5;…	F1RD83;H0WF90;H0WEW6;H0WEQ0;H0WE45;H0WF51;H0WEY6;H0WE68;H0WEU4;H0WFA4;H0WEG2;E9QEC5;E7F8C9;E9QE58;H0WEF7;E9QBK3;F1Q6G9;E9QG62;E9QJL1;E9QIH2;F1R3J3;F1QIE7;F1QAQ0;E9QJQ7;E9QJQ1;E9QJK7;E9QIQ1;E9QHY0;E9QFH7;E9QDM3;E9QBC7;E9QB81;E7EY98;F1Q7M0;E9QGS2;E9QEH9;E9QEF4;E9QC11;E9QI52;H0WF07;E7F6W9;H0WFF7;H0WEP1;H0WEH7;E7F3E4;H0WF72;H0WEG4;E7FEX8;E7F6E3;E9QBY5;F1RDU9;F1Q7M2;E9QI64;E9QBT2;H0WFG2;H0WEU7;H0WES5;…	si:dkey-122c11.6;si:dkey-199m13.9;si:dkey-78k22.2;si:dkey-157e10.8;si:dkeyp-4f2.3;si:dkey-269o24.6;si:ch211-223a21.5;si:dkey-77p23.3;si:dkey-202n8.1;si:dkey-57c22.1;si:dkey-47k16.4;si:dkey-16p19.5;si:dkey-82i20.5;si:ch211-231i17.4;si:dkey-72l17.6;si:ch211-209j12.3;LOC100538010;zgc:174642;zgc:173619;si:dkey-3p4.8;si:dkey-26i24.2;si:dkey-199m13.8;si:dkey-199m13.5;si:dkey-29n10.3;LOC100535831;si:dke…	>tr|F1RD83|F1RD83_DANRE Zgc:173708 OS=Danio rerio GN=zgc:173708 PE=4 SV=1;>tr|H0WF90|H0WF90_DANRE Uncharacterized protein OS=Danio rerio PE=4 SV=1;>tr|H0WEW6|H0WEW6_DANRE Uncharacterized protein OS=Danio rerio PE=4 SV=1;>tr|H0WEQ0|H0WEQ0_DANRE Uncharacteri	295	2	6.9	3.3489e-05	NA	NA	NA	NA	NA	NA	NA	NA	27735000	NA	NA	NA
Q6NYG6;F1RDB0	Q6NYG6;F1RDB0	tdrd3	>sp|Q6NYG6|TDRD3_DANRE Tudor domain-containing protein 3 OS=Danio rerio GN=tdrd3 PE=2 SV=1;>tr|F1RDB0|F1RDB0_DANRE Zgc:77174 OS=Danio rerio GN=zgc:77174 PE=4 SV=1	2	9	15.3	1.139e-43	48974000	39144000	60493000	NA	NA	NA	64318000	46979000	94367000	NA	NA	NA
Q6NYU8;F8W4E3;F8W5P8;F8W2Z3;F8W256	Q6NYU8;F8W4E3;F8W5P8;F8W2Z3	hnrnpab	>tr|Q6NYU8|Q6NYU8_DANRE Heterogeneous nuclear ribonucleoprotein A/B OS=Danio rerio GN=hnrnpab PE=2 SV=1;>tr|F8W4E3|F8W4E3_DANRE Heterogeneous nuclear ribonucleoprotein A/B (Fragment) OS=Danio rerio GN=hnrnpab PE=4 SV=1;>tr|F8W5P8|F8W5P8_DANRE Heterogeneous	5	12	32.6	2.4569e-161	1387800000	1507600000	1253500000	NA	10198000	NA	2013100000	2199700000	2397300000	NA	134360000	NA
F8W4X6;Q90Z10	F8W4X6;Q90Z10	rpl13	>tr|F8W4X6|F8W4X6_DANRE 60S ribosomal protein L13 OS=Danio rerio GN=rpl13 PE=3 SV=1;>sp|Q90Z10|RL13_DANRE 60S ribosomal protein L13 OS=Danio rerio GN=rpl13 PE=2 SV=3	2	4	25.9	5.1872e-70	19947000	25310000	65667000	NA	NA	NA	NA	NA	NA	NA	NA	NA
Q7ZVR8;G1K2G8;Q7ZVR8-2;G1K2P5;A1L1G1	Q7ZVR8;G1K2G8;Q7ZVR8-2;G1K2P5	esrp2	>sp|Q7ZVR8|ESRP2_DANRE Epithelial splicing regulatory protein 2 OS=Danio rerio GN=esrp2 PE=2 SV=2;>tr|G1K2G8|G1K2G8_DANRE Epithelial-splicing regulatory protein 2 OS=Danio rerio GN=esrp2 PE=4 SV=1;>sp|Q7ZVR8-2|ESRP2_DANRE Isoform 2 of Epithelial splicing r	5	13	19.7	1.7208e-103	120270000	54750000	NA	NA	NA	NA	94062000	137770000	77837000	NA	NA	NA
Q6PBI5;G1K2N0	Q6PBI5;G1K2N0	rps25	>sp|Q6PBI5|RS25_DANRE 40S ribosomal protein S25 OS=Danio rerio GN=rps25 PE=2 SV=1;>tr|G1K2N0|G1K2N0_DANRE Ribosomal protein S25 OS=Danio rerio GN=rps25 PE=4 SV=1	2	2	15.3	0.0001114	NA	NA	NA	NA	NA	NA	NA	NA	46370000	NA	NA	NA
O42248	O42248	gnb2l1	>sp|O42248|GBLP_DANRE Guanine nucleotide-binding protein subunit beta-2-like 1 OS=Danio rerio GN=gnb2l1 PE=2 SV=1	1	4	14.2	5.7518e-11	NA	NA	NA	NA	NA	NA	NA	13701000	19137000	NA	NA	NA
P13104;F1RE40;Q6P0W3	P13104;F1RE40;Q6P0W3	tpma;tpm3	>sp|P13104|TPM1_DANRE Tropomyosin alpha-1 chain OS=Danio rerio GN=tpma PE=2 SV=1;>tr|F1RE40|F1RE40_DANRE Alpha-tropomyosin OS=Danio rerio GN=tpma PE=3 SV=1;>tr|Q6P0W3|Q6P0W3_DANRE Novel protein similar to vertebrate tropomyosin 1 (Alpha) (TPM1, zgc:77592)	3	7	19.7	4.6246e-24	31638000	33552000	NA	52468000	65824000	NA	NA	NA	NA	NA	NA	NA
P62084	P62084	rps7	>sp|P62084|RS7_DANRE 40S ribosomal protein S7 OS=Danio rerio GN=rps7 PE=2 SV=1	1	2	11.9	4.206e-06	NA	NA	NA	NA	NA	NA	NA	26430000	47234000	NA	NA	NA
P62247;B5DDE8	P62247	rps8	>sp|P62247|RS8_DANRE 40S ribosomal protein S8 OS=Danio rerio GN=rps8 PE=2 SV=2	2	7	37	1.2602e-75	151460000	128960000	57189000	12294000	36184000	34093000	657860000	327840000	211850000	NA	NA	NA
P79735	P79735	ran	>sp|P79735|RAN_DANRE GTP-binding nuclear protein Ran OS=Danio rerio GN=ran PE=2 SV=1	1	2	9.8	6.1077e-05	15481000	14813000	70403000	17476000	NA	NA	NA	NA	NA	NA	NA	NA
Q05AJ1	Q05AJ1	larp4b	>tr|Q05AJ1|Q05AJ1_DANRE Zgc:153918 OS=Danio rerio GN=zgc:153918 PE=2 SV=1	1	2	3.3	5.0202e-05	NA	NA	NA	NA	NA	NA	9280500	8492600	7736200	NA	NA	NA
Q08BA1	Q08BA1	atp5a1	>tr|Q08BA1|Q08BA1_DANRE ATP synthase subunit alpha OS=Danio rerio GN=atp5a1 PE=2 SV=1	1	3	6.5	4.5235e-08	NA	14515000	NA	14843000	NA	21111000	NA	NA	NA	NA	NA	NA
Q08CK7	Q08CK7	igf2bp1	>sp|Q08CK7|IF2B1_DANRE Insulin-like growth factor 2 mRNA-binding protein 1 OS=Danio rerio GN=igf2bp1 PE=1 SV=1	1	7	12.7	0	NA	NA	NA	NA	NA	NA	NA	25188000	40834000	NA	NA	NA
Q08ES4	Q08ES4	btg4	>tr|Q08ES4|Q08ES4_DANRE B-cell translocation gene 4 OS=Danio rerio GN=btg4 PE=2 SV=1	1	3	14.3	1.3524e-06	24466000	26531000	NA	NA	NA	NA	NA	NA	NA	NA	NA	NA
Q1L8R2	Q1L8R2	sfpq	>tr|Q1L8R2|Q1L8R2_DANRE Splicing factor proline/glutamine rich (Polypyrimidine tract binding protein associated) OS=Danio rerio GN=sfpq PE=2 SV=1	1	11	18.7	1.1139e-42	126980000	103330000	119940000	NA	NA	NA	154950000	111260000	121340000	NA	NA	NA
Q1L8T3;Q1L8T2	Q1L8T3;Q1L8T2	ubap2l	>tr|Q1L8T3|Q1L8T3_DANRE Novel protein similar to vertebrate ubiquitin associated protein 2-like (UBAP2L) OS=Danio rerio GN=ubap2l PE=2 SV=1;>tr|Q1L8T2|Q1L8T2_DANRE Novel protein similar to vertebrate ubiquitin associated protein 2-like (UBAP2L) OS=Danio re	2	5	6.3	9.9862e-21	NA	NA	NA	NA	NA	NA	19550000	14730000	30940000	NA	NA	NA
Q7SXD6;Q1L8V7;Q1L8V8	Q7SXD6;Q1L8V7	mrpl3	>tr|Q7SXD6|Q7SXD6_DANRE Mitochondrial ribosomal protein L3 OS=Danio rerio GN=mrpl3 PE=2 SV=1;>tr|Q1L8V7|Q1L8V7_DANRE Mitochondrial ribosomal protein L3 OS=Danio rerio GN=mrpl3 PE=2 SV=1	3	4	15.4	1.6677e-10	26834000	33322000	NA	NA	NA	NA	NA	NA	NA	NA	NA	NA
Q1LUN5;Q9YGW7;Q1LUN6	Q1LUN5;Q9YGW7;Q1LUN6	dazl	>tr|Q1LUN5|Q1LUN5_DANRE Daz-like gene OS=Danio rerio GN=dazl PE=2 SV=1;>sp|Q9YGW7|DAZL_DANRE Deleted in azoospermia-like OS=Danio rerio GN=dazl PE=1 SV=1;>tr|Q1LUN6|Q1LUN6_DANRE Daz-like gene OS=Danio rerio GN=dazl PE=2 SV=1	3	5	29.7	3.0962e-39	541830000	352740000	432800000	NA	NA	NA	244340000	202270000	276480000	NA	NA	NA
Q1LUY0	Q1LUY0	parp12a	>tr|Q1LUY0|Q1LUY0_DANRE Novel protein similar to vertebrate zinc finger CCCH type domain containing 1 (ZC3HDC1) OS=Danio rerio GN=parp12a PE=4 SV=1	1	3	6.2	4.9532e-09	NA	NA	NA	NA	NA	NA	86180000	63491000	41951000	NA	NA	NA
Q1LV81;F1QB05;F1QVW3;E7FFA2	Q1LV81;F1QB05;F1QVW3	safb	>tr|Q1LV81|Q1LV81_DANRE Novel protein similar to vertebrate scaffold attachment factor B family (Zgc:55387) OS=Danio rerio GN=safb PE=2 SV=1;>tr|F1QB05|F1QB05_DANRE Scaffold attachment factor B OS=Danio rerio GN=safb PE=4 SV=1;>tr|F1QVW3|F1QVW3_DANRE Scaff	4	5	5.7	5.816e-21	NA	NA	NA	NA	NA	NA	84333000	40585000	60914000	NA	NA	NA
Q1LWH1	Q1LWH1	rps16	>tr|Q1LWH1|Q1LWH1_DANRE Novel protein similar to vertebrate ribosomal protein S16 (RPS16) OS=Danio rerio GN=rps16 PE=2 SV=1	1	2	14.4	0.00015435	NA	NA	NA	NA	NA	NA	NA	NA	6053400	NA	NA	NA
Q1LWN2;F1R8M4	Q1LWN2	vtg1	>tr|Q1LWN2|Q1LWN2_DANRE Vitellogenin 1 OS=Danio rerio GN=vtg1 PE=2 SV=1	2	67	51.3	0	1467300000	5738800000	981080000	57684000	352200000	267180000	17784000000	8598700000	10251000000	NA	8870000000	8868100000
Q1MT19;Q6GQM6;F1QLQ7;Q1MT20;Q90409;F1QGR7;F1R133;F1QGN3;Q6P105;F1R0S9	Q1MT19;Q6GQM6;F1QLQ7	elavl2	>tr|Q1MT19|Q1MT19_DANRE ELAV (embryonic lethal, abnormal vision, Drosophila)-like 2 (Hu antigen B) OS=Danio rerio GN=elavl2 PE=2 SV=1;>tr|Q6GQM6|Q6GQM6_DANRE ELAV (embryonic lethal, abnormal vision, Drosophila)-like 2 (Hu antigen B) OS=Danio rerio GN=elavl	10	10	29.9	4.6468e-38	56827000	48590000	47767000	NA	NA	NA	76405000	116010000	126530000	NA	NA	NA
Q1MTC4;F1R876	Q1MTC4	vtg2	>tr|Q1MTC4|Q1MTC4_DANRE Novel protein similar to vitellogenin 1 (Vg1) OS=Danio rerio GN=vtg2 PE=4 SV=1	2	62	43.3	0	105200000	434350000	47240000	NA	45716000	NA	4212700000	1287200000	1812800000	NA	839700000	732450000
Q1RMB1;F1QNU7;F1QID9;F1QV16;F1QIE4;F1QN62	Q1RMB1;F1QNU7;F1QID9;F1QV16;F1QIE4;F1QN62	zgc:136254;si:ch211-251f6.6;si:ch211-251f6.7	>tr|Q1RMB1|Q1RMB1_DANRE Zgc:136254 OS=Danio rerio GN=zgc:136254 PE=2 SV=1;>tr|F1QNU7|F1QNU7_DANRE Si:ch211-251f6.6 OS=Danio rerio GN=si:ch211-251f6.6 PE=4 SV=1;>tr|F1QID9|F1QID9_DANRE Si:ch211-251f6.7 OS=Danio rerio GN=si:ch211-251f6.7 PE=4 SV=1;>tr|F1QV16	6	2	15.3	1.1791e-16	NA	NA	220570000	NA	NA	NA	NA	NA	NA	NA	NA	NA
Q24JV3	Q24JV3	rpl31	>tr|Q24JV3|Q24JV3_DANRE Zgc:136896 OS=Danio rerio GN=zgc:136896 PE=2 SV=1	1	4	33.3	3.2748e-62	NA	NA	NA	NA	NA	NA	286530000	132150000	87198000	NA	NA	NA
Q803E3;Q4QRG0	Q803E3;Q4QRG0	ewsr1b	>tr|Q803E3|Q803E3_DANRE Ewing sarcoma breakpoint region 1b OS=Danio rerio GN=ewsr1b PE=2 SV=1;>tr|Q4QRG0|Q4QRG0_DANRE Ewing sarcoma breakpoint region 1b OS=Danio rerio GN=ewsr1b PE=2 SV=1	2	4	6.2	7.9823e-73	222460000	222020000	192350000	NA	NA	NA	600930000	487430000	542250000	NA	NA	NA
Q4V918	Q4V918	psma3	>tr|Q4V918|Q4V918_DANRE Proteasome subunit alpha type OS=Danio rerio GN=psma3 PE=2 SV=1	1	2	8.2	7.4775e-09	NA	NA	NA	NA	NA	NA	NA	19181000	NA	NA	NA	NA
Q4VBV2	Q4VBV2	rps27.1	>tr|Q4VBV2|Q4VBV2_DANRE 40S ribosomal protein S27 OS=Danio rerio GN=CH211-39A7.2 PE=2 SV=1	1	3	38.1	3.7727e-08	NA	NA	NA	NA	NA	NA	127010000	34915000	45318000	NA	NA	NA
Q503D3	Q503D3	ptbp1a	>tr|Q503D3|Q503D3_DANRE Novel protein similar to vertebrate polypyrimidine tract binding protein 1 (PTBP1, zgc:110689) OS=Danio rerio GN=ptbp1a PE=2 SV=1	1	9	15	5.0039e-101	122630000	83344000	116660000	NA	NA	NA	186100000	136710000	143300000	NA	NA	NA
Q503X2	Q503X2	mrpl4	>sp|Q503X2|RM04_DANRE 39S ribosomal protein L4, mitochondrial OS=Danio rerio GN=mrpl4 PE=2 SV=1	1	2	8.3	4.1062e-05	NA	NA	NA	NA	NA	NA	14545000	NA	NA	NA	NA	NA
Q566W6	Q566W6	zgc:112425	>tr|Q566W6|Q566W6_DANRE Zgc:112425 OS=Danio rerio GN=zgc:112425 PE=2 SV=1	1	10	55.1	0	1989800000	1699500000	1026600000	NA	9203100	32138000	2261700000	2453100000	4356600000	NA	153510000	NA
Q567N5	Q567N5	rpl6	>tr|Q567N5|Q567N5_DANRE Ribosomal protein L6 OS=Danio rerio GN=rpl6 PE=2 SV=1	1	7	29.1	4.3215e-136	69829000	169940000	63591000	NA	26017000	NA	611200000	142250000	297110000	NA	NA	NA
Q5BJJ2;F1QBR2	Q5BJJ2	rpl3	>tr|Q5BJJ2|Q5BJJ2_DANRE Ribosomal protein L3 OS=Danio rerio GN=rpl3 PE=2 SV=1	2	6	13.9	1.1938e-13	NA	20593000	38773000	NA	NA	NA	NA	NA	NA	NA	NA	NA
Q5D018	Q5D018	rbm8a	>sp|Q5D018|RBM8A_DANRE RNA-binding protein 8A OS=Danio rerio GN=rbm8a PE=2 SV=1	1	2	5.2	1.6816e-05	NA	NA	NA	NA	NA	NA	NA	NA	NA	NA	894910000	NA
Q5RG16;Q5RG15;Q5RG09	Q5RG16;Q5RG15;Q5RG09	si:dkey-241l7.4;si:dkey-241l7.5;si:dkey-241l7.2	>tr|Q5RG16|Q5RG16_DANRE Novel protein OS=Danio rerio GN=si:dkey-241l7.4 PE=4 SV=1;>tr|Q5RG15|Q5RG15_DANRE Novel protein OS=Danio rerio GN=si:dkey-241l7.5 PE=4 SV=1;>tr|Q5RG09|Q5RG09_DANRE Novel protein OS=Danio rerio GN=si:dkey-241l7.2 PE=4 SV=1	3	3	30.1	1.8441e-103	NA	NA	933520000	NA	NA	NA	NA	NA	NA	NA	NA	NA
Q5RG12;E7EZ16;Q90474;O57521	Q5RG12;E7EZ16;Q90474;O57521	hsp90aa1.2;hsp90ab1;hsp90a.1	>tr|Q5RG12|Q5RG12_DANRE Heat shock protein 90-alpha 2 OS=Danio rerio GN=hsp90a.2 PE=2 SV=1;>tr|E7EZ16|E7EZ16_DANRE Heat shock protein 90, alpha (cytosolic), class B member 1 OS=Danio rerio GN=OTTDARG00000024833 PE=3 SV=1;>sp|Q90474|H90A1_DANRE Heat shock p	4	4	6.3	6.5458e-19	24078000	NA	NA	27369000	32624000	NA	NA	NA	27748000	NA	NA	NA
Q5RHQ7	Q5RHQ7	hnrnpub	>tr|Q5RHQ7|Q5RHQ7_DANRE Heterogeneous nuclear ribonucleoprotein U OS=Danio rerio GN=hnrnpu PE=2 SV=1	1	9	11.6	1.4257e-38	NA	NA	NA	NA	NA	NA	190570000	212610000	250020000	NA	NA	NA
Q5TYP2	Q5TYP2	zp3a.2	>tr|Q5TYP2|Q5TYP2_DANRE Zona pellucida glycoprotein 3a, like OS=Danio rerio GN=zp3a.2 PE=2 SV=1	1	5	16.7	7.1661e-32	NA	39262000	329970000	NA	NA	NA	NA	NA	NA	NA	NA	NA
Q5TYP5	Q5TYP5	zp3a.1	>tr|Q5TYP5|Q5TYP5_DANRE Zona pellucida glycoprotein 3a OS=Danio rerio GN=zp3a.1 PE=2 SV=1	1	3	10.2	3.4337e-24	NA	NA	182830000	NA	NA	NA	NA	NA	NA	NA	NA	NA
Q5TYX2;E7FDF8	Q5TYX2	si:dkeyp-50f7.2	>tr|Q5TYX2|Q5TYX2_DANRE Novel protein containing a zona pellucida-like domain (Wu:fi27h02) OS=Danio rerio GN=si:dkeyp-50f7.2 PE=2 SV=1	2	10	9.7	3.1468e-67	NA	48268000	1730200000	NA	NA	NA	NA	NA	NA	NA	NA	NA
Q5XJ10;E9QIH5;Q5MJ86;F1R3D3;E9QGA9	Q5XJ10;E9QIH5;Q5MJ86;F1R3D3	gapdh;gapdh-2;gapdhs	>sp|Q5XJ10|G3P_DANRE Glyceraldehyde-3-phosphate dehydrogenase OS=Danio rerio GN=gapdh PE=2 SV=2;>tr|E9QIH5|E9QIH5_DANRE Glyceraldehyde-3-phosphate dehydrogenase OS=Danio rerio GN=gapdh PE=3 SV=1;>sp|Q5MJ86|G3PT_DANRE Glyceraldehyde 3-phosphate dehydrogenas	5	4	15	1.0293e-42	139110000	99162000	270810000	310750000	201300000	NA	NA	267080000	49507000	463040000	159420000	NA
Q642H9	Q642H9	rps4x	>sp|Q642H9|RS4X_DANRE 40S ribosomal protein S4, X isoform OS=Danio rerio GN=rps4x PE=2 SV=3	1	9	34.2	9.3043e-26	151610000	111290000	166820000	NA	NA	NA	136430000	244240000	324740000	NA	NA	NA
Q6DBR0	Q6DBR0	rpusd4	>sp|Q6DBR0|RUSD4_DANRE RNA pseudouridylate synthase domain-containing protein 4 OS=Danio rerio GN=rpusd4 PE=2 SV=1	1	3	9.8	8.6405e-06	25940000	31729000	32954000	NA	NA	NA	NA	NA	NA	NA	NA	NA
Q6DH02	Q6DH02	mrpl24	>sp|Q6DH02|RM24_DANRE Probable 39S ribosomal protein L24, mitochondrial OS=Danio rerio GN=mrpl24 PE=2 SV=1	1	3	17.6	1.8233e-09	NA	NA	NA	NA	NA	NA	23230000	35655000	27623000	NA	NA	NA
Q6DHL6	Q6DHL6	rps6	>tr|Q6DHL6|Q6DHL6_DANRE 40S ribosomal protein S6 OS=Danio rerio GN=zgc:92237 PE=2 SV=1	1	4	17.7	2.2915e-21	65084000	62261000	168350000	NA	15563000	20211000	274850000	221830000	433390000	NA	NA	NA
Q6DRC4	Q6DRC4	eif3g	>sp|Q6DRC4|EIF3G_DANRE Eukaryotic translation initiation factor 3 subunit G OS=Danio rerio GN=eif3g PE=1 SV=1	1	8	42	5.4334e-51	84890000	60512000	76280000	NA	NA	NA	108350000	85957000	237420000	NA	NA	NA
Q6IQ97	Q6IQ97	rbm4.1	>sp|Q6IQ97|RBM41_DANRE RNA-binding protein 4.1 OS=Danio rerio GN=rbm4.1 PE=1 SV=1	1	11	32.2	2.0833e-141	NA	NA	NA	NA	NA	NA	63588000	59902000	75037000	NA	NA	NA
Q6IQE0-2;Q6IQE0-3;Q6IQE0	Q6IQE0-2;Q6IQE0-3;Q6IQE0	puf60b	>sp|Q6IQE0-2|PU60B_DANRE Isoform 2 of Poly(U)-binding-splicing factor PUF60-B OS=Danio rerio GN=puf60b;>sp|Q6IQE0-3|PU60B_DANRE Isoform 3 of Poly(U)-binding-splicing factor PUF60-B OS=Danio rerio GN=puf60b;>sp|Q6IQE0|PU60B_DANRE Poly(U)-binding-splicing fa	3	2	7	7.7938e-06	NA	NA	NA	NA	NA	NA	NA	NA	2359200	NA	NA	NA
Q6P5M9;Q6IQJ2;F1R6Y8;F1RBW2;F1QEH9	Q6P5M9;Q6IQJ2;F1R6Y8;F1RBW2;F1QEH9	tubb4b	>tr|Q6P5M9|Q6P5M9_DANRE Tubulin, beta 2c OS=Danio rerio GN=tubb2c PE=2 SV=1;>tr|Q6IQJ2|Q6IQJ2_DANRE Novel protein (Zgc:55461) OS=Danio rerio GN=DKEY-2N12.2 PE=2 SV=1;>tr|F1R6Y8|F1R6Y8_DANRE Zgc:123194 OS=Danio rerio GN=zgc:123194 PE=3 SV=1;>tr|F1RBW2|F1RBW	5	7	19.1	2.6576e-21	11563000	13852000	26988000	22948000	22669000	18893000	23935000	16211000	19330000	NA	NA	NA
Q6IQQ0	Q6IQQ0	rpl21	>tr|Q6IQQ0|Q6IQQ0_DANRE Ribosomal protein L21 OS=Danio rerio GN=rpl21 PE=2 SV=1	1	2	19.4	5.7274e-05	NA	NA	NA	NA	NA	NA	8576000	NA	NA	NA	NA	NA
Q6NW62;Q08BJ2	Q6NW62	khdrbs1b	>tr|Q6NW62|Q6NW62_DANRE KH domain containing, RNA binding, signal transduction associated 1b OS=Danio rerio GN=khdrbs1b PE=2 SV=1	2	7	17.9	5.312e-21	324200000	302280000	324490000	NA	NA	NA	377500000	300640000	312650000	NA	NA	NA
Q6NWC3;E9QDR0	Q6NWC3	rps2	>tr|Q6NWC3|Q6NWC3_DANRE Ribosomal protein S2 OS=Danio rerio GN=rps2 PE=2 SV=1	2	13	49.3	3.766e-167	1663600000	1541800000	2125500000	12072000	19855000	35916000	1120500000	713160000	2394100000	NA	NA	NA
Q6NWC6;Q6NWC6-2;G8JL13;Q1L8Q3;H0WFE8	Q6NWC6;Q6NWC6-2	cpsf6	>sp|Q6NWC6|CPSF6_DANRE Cleavage and polyadenylation specificity factor subunit 6 OS=Danio rerio GN=cpsf6 PE=2 SV=1;>sp|Q6NWC6-2|CPSF6_DANRE Isoform 2 of Cleavage and polyadenylation specificity factor subunit 6 OS=Danio rerio GN=cpsf6	5	7	18.7	6.4816e-36	43367000	52399000	NA	NA	NA	NA	NA	54522000	47331000	NA	NA	NA
Q6NXC1	Q6NXC1	rbm4.3	>tr|Q6NXC1|Q6NXC1_DANRE RNA binding motif protein 4.3 OS=Danio rerio GN=rbm4.3 PE=2 SV=1	1	26	68	6.4419e-249	1665600000	1629000000	956210000	NA	2201300	23366000	1787900000	1420100000	1441100000	NA	110840000	124510000
Q6NY74	Q6NY74	rpa1	>sp|Q6NY74|RFA1_DANRE Replication protein A 70 kDa DNA-binding subunit OS=Danio rerio GN=rpa1 PE=1 SV=1	1	5	9.7	2.3451e-17	NA	NA	NA	NA	NA	NA	21735000	40438000	26479000	NA	NA	NA
Q6NYA1	Q6NYA1	zgc:77052	>tr|Q6NYA1|Q6NYA1_DANRE Zgc:77052 OS=Danio rerio GN=zgc:77052 PE=2 SV=1	1	13	36.6	0	6798200000	6892400000	2179700000	64570000	151980000	129090000	4007600000	3485400000	3661500000	NA	752080000	236050000
Q6NYR4;Q90473	Q6NYR4;Q90473	hspa8	>tr|Q6NYR4|Q6NYR4_DANRE Heat shock 70kDa protein 8 OS=Danio rerio GN=hspa8 PE=2 SV=1;>sp|Q90473|HSP7C_DANRE Heat shock cognate 71 kDa protein OS=Danio rerio GN=hspa8 PE=2 SV=1	2	12	20	3.2735e-45	47670000	51500000	99277000	80976000	152000000	119910000	NA	46431000	49965000	54738000	127180000	NA
Q6NZ06	Q6NZ06	ilf2	>sp|Q6NZ06|ILF2_DANRE Interleukin enhancer-binding factor 2 homolog OS=Danio rerio GN=ilf2 PE=2 SV=1	1	10	30.2	1.0124e-134	93995000	121860000	25280000	NA	NA	NA	111780000	182390000	99663000	NA	NA	NA
Q6NZS4	Q6NZS4	zgc:76871	>sp|Q6NZS4|RTCB_DANRE tRNA-splicing ligase RtcB homolog OS=Danio rerio GN=zgc:76871 PE=2 SV=1	1	6	14.5	1.5446e-15	30055000	21320000	37111000	NA	NA	NA	51311000	55279000	65166000	NA	NA	NA
Q6P022;F1QVD2;E7F8Y4	Q6P022;F1QVD2;E7F8Y4	u2af2b;u2af2a	>tr|Q6P022|Q6P022_DANRE Novel protein (Zgc:77804) OS=Danio rerio GN=u2af2b PE=2 SV=1;>tr|F1QVD2|F1QVD2_DANRE U2 small nuclear RNA auxiliary factor 2a OS=Danio rerio GN=u2af2a PE=4 SV=1;>tr|E7F8Y4|E7F8Y4_DANRE U2 small nuclear RNA auxiliary factor 2a OS=Dan	3	6	16.4	1.0447e-20	NA	NA	NA	NA	NA	NA	36577000	34227000	45542000	NA	NA	NA
Q6P0B2	Q6P0B2	lsm14ab	>tr|Q6P0B2|Q6P0B2_DANRE C19orf13-like protein OS=Danio rerio GN=lsm14ab PE=2 SV=1	1	16	38.2	0	143490000	103790000	95061000	NA	NA	NA	313090000	379100000	394200000	NA	NA	NA
Q6P0G2	Q6P0G2	zgc:77262	>tr|Q6P0G2|Q6P0G2_DANRE Zgc:77262 OS=Danio rerio GN=zgc:77262 PE=2 SV=1	1	11	41.1	1.3319e-43	109950000	119640000	134030000	NA	NA	NA	128840000	95751000	111910000	NA	NA	NA
Q6P0I2	Q6P0I2	psma8	>tr|Q6P0I2|Q6P0I2_DANRE Proteasome subunit alpha type OS=Danio rerio GN=psma8 PE=2 SV=1	1	4	24.3	3.5282e-14	NA	NA	NA	NA	NA	NA	NA	NA	NA	17946000	NA	NA
Q6P0V0	Q6P0V0	hnrnph1	>tr|Q6P0V0|Q6P0V0_DANRE Heterogeneous nuclear ribonucleoprotein H1 OS=Danio rerio GN=hnrnph1 PE=2 SV=1	1	9	31.8	2.3987e-250	169160000	100270000	125850000	NA	NA	NA	91266000	71427000	76255000	NA	NA	NA
Q6P0V6;B0S6P5	Q6P0V6	rpl8	>sp|Q6P0V6|RL8_DANRE 60S ribosomal protein L8 OS=Danio rerio GN=rpl8 PE=2 SV=3	2	11	39.3	1.2437e-79	394720000	749730000	820720000	NA	NA	4896300	1477200000	1303300000	1030600000	NA	NA	NA
Q6P111;F1Q8I5;F1QIS2;F1QIF2	Q6P111;F1Q8I5	lsm14aa	>tr|Q6P111|Q6P111_DANRE LSM14 homolog A (SCD6, S. cerevisiae) OS=Danio rerio GN=lsm14aa PE=1 SV=1;>tr|F1Q8I5|F1Q8I5_DANRE LSM14 homolog Aa (SCD6, S. cerevisiae) OS=Danio rerio GN=lsm14aa PE=4 SV=1	4	18	43.3	0	988210000	1086000000	598760000	10098000	22647000	32728000	972970000	1019200000	1974900000	NA	78256000	NA
Q6P124;F1QJB8;F1QX72;F1QGX3;F1QFP9	Q6P124;F1QJB8	g3bp1	>tr|Q6P124|Q6P124_DANRE GTPase activating protein (SH3 domain) binding protein 1 OS=Danio rerio GN=g3bp1 PE=2 SV=1;>tr|F1QJB8|F1QJB8_DANRE GTPase-activating protein (SH3 domain)-binding protein 1 (Fragment) OS=Danio rerio GN=g3bp1 PE=4 SV=1	5	9	22.9	1.016e-36	43118000	30576000	85442000	NA	NA	NA	NA	43428000	131380000	NA	NA	NA
Q6P2A9	Q6P2A9	fubp1	>tr|Q6P2A9|Q6P2A9_DANRE Far upstream element (FUSE) binding protein 1 OS=Danio rerio GN=fubp1 PE=2 SV=1	1	21	40.8	3.9125e-181	584910000	635150000	702670000	NA	NA	NA	861810000	639020000	739900000	NA	NA	NA
Q6P3J5;A2CE51	Q6P3J5;A2CE51	eef2b;eef2l2	>tr|Q6P3J5|Q6P3J5_DANRE Eukaryotic translation elongation factor 2 OS=Danio rerio GN=eef2b PE=2 SV=1;>tr|A2CE51|A2CE51_DANRE Eukaryotic translation elongation factor 2, like 2 OS=Danio rerio GN=eef2l2 PE=4 SV=1	2	13	18.8	1.0557e-38	48362000	30989000	NA	79370000	55179000	48126000	39711000	50368000	116790000	33900000	NA	NA
Q6P3L3	Q6P3L3	hspa5	>tr|Q6P3L3|Q6P3L3_DANRE Heat shock protein 5 OS=Danio rerio GN=hspa5 PE=2 SV=1	1	11	21.5	1.9713e-45	22198000	32980000	NA	51268000	86777000	48331000	NA	NA	NA	40544000	43475000	NA
Q6P5L3	Q6P5L3	rpl19	>sp|Q6P5L3|RL19_DANRE 60S ribosomal protein L19 OS=Danio rerio GN=rpl19 PE=2 SV=1	1	3	13.8	6.965e-24	NA	NA	NA	NA	NA	NA	NA	95588000	80350000	NA	NA	NA
Q6P5M3;A3KQ06	Q6P5M3;A3KQ06	rps9	>tr|Q6P5M3|Q6P5M3_DANRE Ribosomal protein S9 OS=Danio rerio GN=rps9 PE=2 SV=1;>tr|A3KQ06|A3KQ06_DANRE Ribosomal protein S9 (Fragment) OS=Danio rerio GN=rps9 PE=3 SV=1	2	5	22.7	5.0625e-09	29727000	23319000	36690000	NA	NA	NA	NA	NA	NA	NA	NA	NA
Q6P698;Q6DG81	Q6P698;Q6DG81	lcp1;pls3	>sp|Q6P698|PLSL_DANRE Plastin-2 OS=Danio rerio GN=lcp1 PE=2 SV=1;>tr|Q6DG81|Q6DG81_DANRE Plastin 3 (T isoform) OS=Danio rerio GN=pls3 PE=2 SV=1	2	3	5.1	1.5329e-07	9331200	NA	NA	25586000	18742000	16085000	NA	NA	NA	NA	NA	NA
Q6PBK3	Q6PBK3	rps28	>sp|Q6PBK3|RS28_DANRE 40S ribosomal protein S28 OS=Danio rerio GN=rps28 PE=3 SV=1	1	3	46.4	7.4007e-14	20366000	11899000	NA	NA	NA	NA	40753000	47663000	156790000	NA	NA	NA
Q6PBW3	Q6PBW3	rps14	>tr|Q6PBW3|Q6PBW3_DANRE Ribosomal protein S14 OS=Danio rerio GN=rps14 PE=2 SV=1	1	8	40.4	2.5729e-31	127460000	86285000	231150000	11578000	NA	NA	435280000	289320000	703080000	NA	NA	NA
Q6PBW7;E9QHH0	Q6PBW7;E9QHH0	rps19	>tr|Q6PBW7|Q6PBW7_DANRE Ribosomal protein S19 OS=Danio rerio GN=rps19 PE=2 SV=1;>tr|E9QHH0|E9QHH0_DANRE Ribosomal protein S19 OS=Danio rerio GN=rps19 PE=4 SV=1	2	2	13	3.2695e-05	NA	NA	NA	NA	NA	NA	NA	NA	54206000	NA	NA	NA
Q6PBY1	Q6PBY1	rps3a	>sp|Q6PBY1|RS3A_DANRE 40S ribosomal protein S3a OS=Danio rerio GN=rps3a PE=2 SV=3	1	9	39.7	2.5294e-24	149110000	97943000	344960000	NA	17833000	NA	295380000	91644000	140330000	NA	NA	NA
Q6PBY3	Q6PBY3	edf1	>sp|Q6PBY3|EDF1_DANRE Endothelial differentiation-related factor 1 homolog OS=Danio rerio GN=edf1 PE=2 SV=1	1	8	47.3	2.5338e-22	111720000	88649000	190540000	NA	NA	NA	147230000	85362000	236240000	NA	NA	NA
Q6PBZ1	Q6PBZ1	rpl7a	>tr|Q6PBZ1|Q6PBZ1_DANRE Ribosomal protein L7a OS=Danio rerio GN=rpl7a PE=2 SV=1	1	9	30.5	5.6828e-45	40612000	67234000	47938000	NA	NA	17850000	301410000	137920000	102430000	NA	NA	NA
Q6PC12;E9QCX7;Q6PC89;E9QJI6;F1QXA1;F1QM34;Q1LYP3;Q6TH14;Q6GQM9;F1QBW7	Q6PC12;E9QCX7;Q6PC89	eno1a;eno1b	>tr|Q6PC12|Q6PC12_DANRE Enolase 1, (Alpha) OS=Danio rerio GN=eno1 PE=2 SV=1;>tr|E9QCX7|E9QCX7_DANRE Enolase OS=Danio rerio PE=3 SV=1;>tr|Q6PC89|Q6PC89_DANRE Uncharacterized protein OS=Danio rerio GN=zgc:73056 PE=2 SV=1	10	4	14.4	6.9065e-76	19056000	28882000	NA	40645000	64157000	46648000	NA	25660000	21864000	39551000	63791000	104540000
Q6PC14	Q6PC14	rpl23	>sp|Q6PC14|RL23_DANRE 60S ribosomal protein L23 OS=Danio rerio GN=rpl23 PE=2 SV=1	1	2	21.4	1.5988e-19	NA	NA	NA	NA	NA	NA	159010000	58808000	46761000	NA	NA	NA
Q6PC80	Q6PC80	rps5	>tr|Q6PC80|Q6PC80_DANRE Ribosomal protein S5 OS=Danio rerio GN=rps5 PE=2 SV=1	1	5	24.5	5.5132e-19	NA	NA	NA	NA	NA	NA	NA	33631000	57276000	NA	NA	NA
Q6PCR7	Q6PCR7	eif3a	>sp|Q6PCR7|EIF3A_DANRE Eukaryotic translation initiation factor 3 subunit A OS=Danio rerio GN=eif3a PE=2 SV=1	1	22	19.7	1.7852e-121	94726000	37023000	86196000	NA	NA	NA	189600000	90939000	365740000	NA	68393000	NA
Q6PGX4	Q6PGX4	hsc70	>tr|Q6PGX4|Q6PGX4_DANRE Zgc:63663 OS=Danio rerio GN=zgc:63663 PE=2 SV=1	1	12	18.7	3.9101e-33	NA	6786500	NA	NA	NA	NA	NA	NA	NA	NA	NA	NA
Q6PHD8;E9QCR3	Q6PHD8	pa2g4b	>tr|Q6PHD8|Q6PHD8_DANRE Proliferation-associated 2G4 ,b OS=Danio rerio GN=pa2g4b PE=2 SV=1	2	5	14.5	1.7641e-12	NA	NA	NA	NA	NA	NA	22016000	27576000	28481000	NA	NA	NA
Q6PI52	Q6PI52	calm1a	>sp|Q6PI52|CALM_DANRE Calmodulin OS=Danio rerio GN=calm1a PE=2 SV=3	1	5	36.9	1.8247e-146	24798000	29539000	58677000	76498000	140990000	54889000	NA	728960000	25033000	NA	NA	NA
Q6Q417	Q6Q417	rpl7	>tr|Q6Q417|Q6Q417_DANRE Ribosomal protein L7 OS=Danio rerio GN=rpl7 PE=2 SV=1	1	6	19.5	5.433e-17	NA	NA	NA	NA	NA	NA	180450000	119060000	81685000	NA	NA	NA
Q6TGS5;Q6TNP9	Q6TGS5;Q6TNP9	tuba4l;tuba8l	>tr|Q6TGS5|Q6TGS5_DANRE Alpha tubulin-like protein OS=Danio rerio GN=tuba4l PE=2 SV=1;>tr|Q6TNP9|Q6TNP9_DANRE Tubulin, alpha 2 OS=Danio rerio GN=tuba8l PE=2 SV=1	2	3	10.2	6.8078e-11	NA	NA	NA	NA	NA	NA	NA	8871600	12214000	NA	NA	NA
Q6TGT9;F8W2Y8	Q6TGT9	srsf5a	>tr|Q6TGT9|Q6TGT9_DANRE Serine/arginine-rich splicing factor 5a OS=Danio rerio GN=srsf5a PE=2 SV=1	2	3	12.7	5.3756e-12	NA	NA	47917000	NA	NA	NA	52596000	NA	24295000	NA	NA	NA
Q6TGY6;B8K0D5;B8K0D6	Q6TGY6;B8K0D5	pabpc1l	>tr|Q6TGY6|Q6TGY6_DANRE Poly(A) binding protein, cytoplasmic 1-like OS=Danio rerio GN=pabpc1l PE=2 SV=1;>tr|B8K0D5|B8K0D5_DANRE Novel protein similar to H.sapiens PABPC1, poly(A) binding protein, cytoplasmic 1 (PABPC1, zgc:55855) (Fragment) OS=Danio rerio	3	36	69.2	0	4021700000	2798100000	1326300000	616140	4018900	5427300	5591200000	3857400000	3747000000	NA	6036900	NA
Q6TH15	Q6TH15	eif3d	>sp|Q6TH15|EIF3D_DANRE Eukaryotic translation initiation factor 3 subunit D OS=Danio rerio GN=eif3d PE=2 SV=1	1	11	23.6	3.1874e-163	NA	NA	110570000	NA	NA	NA	104880000	85391000	198280000	NA	NA	NA
Q6TH32	Q6TH32	cfl1	>tr|Q6TH32|Q6TH32_DANRE Cofilin 1 OS=Danio rerio GN=cfl1 PE=2 SV=1	1	2	16.4	0.0015532	NA	NA	NA	NA	NA	NA	NA	NA	7112100	NA	NA	NA
Q6TLG8	Q6TLG8	rps3	>tr|Q6TLG8|Q6TLG8_DANRE Ribosomal protein S3 OS=Danio rerio GN=rps3 PE=2 SV=1	1	21	80.8	9.7288e-119	902580000	244630000	577170000	NA	29107000	107460000	589530000	509170000	2109000000	NA	NA	NA
Q7SXA1	Q7SXA1	rpl26	>tr|Q7SXA1|Q7SXA1_DANRE Ribosomal protein L26 OS=Danio rerio GN=rpl26 PE=2 SV=1	1	2	11.7	0.00010636	25137000	47430000	NA	NA	24321000	NA	NA	NA	NA	NA	NA	NA
Q7SXN2;F1QC42	Q7SXN2	hnrpdl	>tr|Q7SXN2|Q7SXN2_DANRE Heterogeneous nuclear ribonucleoprotein D-like OS=Danio rerio GN=hnrpdl PE=2 SV=1	2	12	42.6	7.0497e-136	548080000	522040000	301000000	NA	NA	15656000	429630000	926340000	1367700000	NA	NA	NA
Q7SXP4;E9QGF8;Q6NYA0;F1QXQ1;F1RBL9;F1RCS7;E9QIC5	Q7SXP4;E9QGF8;Q6NYA0;F1QXQ1;F1RBL9;F1RCS7	srsf1a;srsf1b	>sp|Q7SXP4|SRS1A_DANRE Serine/arginine-rich splicing factor 1A OS=Danio rerio GN=srsf1a PE=2 SV=2;>tr|E9QGF8|E9QGF8_DANRE Serine/arginine-rich-splicing factor 1a OS=Danio rerio GN=srsf1a PE=4 SV=1;>sp|Q6NYA0|SRS1B_DANRE Serine/arginine-rich splicing factor	7	15	53.3	2.7809e-49	187890000	179410000	235020000	NA	NA	NA	325080000	357980000	405880000	NA	NA	NA
Q7SZC9	Q7SZC9	hnrnpr	>tr|Q7SZC9|Q7SZC9_DANRE Heterogeneous nuclear ribonucleoprotein R OS=Danio rerio GN=hnrpr PE=2 SV=1	1	14	77.6	0	1262600000	1019900000	712630000	16470000	23130000	13027000	899940000	1409100000	1473400000	NA	493810000	NA
Q7SZD2	Q7SZD2	pdap1a	>tr|Q7SZD2|Q7SZD2_DANRE Solute carrier family 16 (Monocarboxylic acid transporters), member 8 OS=Danio rerio GN=slc16a8 PE=2 SV=1	1	2	12.7	0.00013535	NA	NA	NA	NA	NA	NA	NA	NA	11368000	NA	NA	NA
Q7SZS0;E7FBT4	Q7SZS0;E7FBT4	zgc:65772;LOC564283	>tr|Q7SZS0|Q7SZS0_DANRE Zgc:65772 OS=Danio rerio GN=zgc:65772 PE=2 SV=1;>tr|E7FBT4|E7FBT4_DANRE Uncharacterized protein OS=Danio rerio PE=4 SV=1	2	2	9.3	0.00031126	NA	NA	NA	NA	NA	NA	NA	NA	12616000	NA	NA	NA
Q7T1J9;F8W2R0	Q7T1J9;F8W2R0	rps10	>tr|Q7T1J9|Q7T1J9_DANRE Ribosomal protein S10 OS=Danio rerio GN=rps10 PE=2 SV=1;>tr|F8W2R0|F8W2R0_DANRE Ribosomal protein S10 OS=Danio rerio GN=rps10 PE=4 SV=1	2	4	23.5	6.2598e-07	NA	NA	NA	NA	NA	NA	NA	NA	63904000	NA	NA	NA
Q7T1K0;E9QHB7	Q7T1K0;E9QHB7	rpl17	>tr|Q7T1K0|Q7T1K0_DANRE Zgc:65996 OS=Danio rerio GN=zgc:65996 PE=2 SV=1;>tr|E9QHB7|E9QHB7_DANRE Zgc:65996 OS=Danio rerio GN=zgc:65996 PE=3 SV=1	2	3	21.7	6.8975e-06	NA	NA	NA	NA	NA	NA	NA	NA	7427800	NA	NA	NA
Q7T334	Q7T334	mdh2	>tr|Q7T334|Q7T334_DANRE Malate dehydrogenase OS=Danio rerio GN=zgc:64133 PE=2 SV=1	1	4	16.6	5.6028e-11	NA	NA	39722000	36853000	46149000	NA	NA	NA	NA	NA	NA	NA
Q7ZSY6;P52722	Q7ZSY6;P52722	mt2;mt	>sp|Q7ZSY6|MT2_DANRE Metallothionein-2 OS=Danio rerio GN=mt2 PE=2 SV=1;>sp|P52722|MT1_DANRE Metallothionein-1 OS=Danio rerio GN=mt PE=2 SV=1	2	2	31.7	0.00066432	NA	NA	28209000	NA	NA	NA	NA	NA	NA	NA	NA	NA
Q7ZTI0	Q7ZTI0	ssb	>tr|Q7ZTI0|Q7ZTI0_DANRE Sjogren syndrome antigen B (Autoantigen La) OS=Danio rerio GN=ssb PE=2 SV=1	1	18	45.4	0	645500000	783440000	445650000	NA	NA	23969000	1075200000	730330000	985350000	NA	57615000	NA
Q7ZTS8	Q7ZTS8	elavl1	>tr|Q7ZTS8|Q7ZTS8_DANRE ELAV (embryonic lethal, abnormal vision, Drosophila)-like 1 (Hu antigen R) OS=Danio rerio GN=elavl1 PE=2 SV=1	1	20	64.5	0	17840000000	16480000000	15014000000	2358200	3123700	4941100	20806000000	22828000000	23424000000	NA	219390000	NA
Q7ZU48	Q7ZU48	hnrnpa0l	>tr|Q7ZU48|Q7ZU48_DANRE Heterogeneous nuclear ribonucleoprotein A0, like OS=Danio rerio GN=hnrnpa0l PE=2 SV=2	1	14	49	0	3808900000	2472900000	2418700000	40844000	50446000	21148000	3530800000	5892300000	4849000000	NA	1130300000	629550000
Q7ZU62;B0R193;Q3B7P7;F1Q8K7;B0R189;F1R2W8;F1QHN6	Q7ZU62;B0R193;Q3B7P7;F1Q8K7;B0R189;F1R2W8;F1QHN6	rps27a;ubb;uba52;si:ch211-202a12.4;ubc	>tr|Q7ZU62|Q7ZU62_DANRE Ribosomal protein S27a (Fragment) OS=Danio rerio GN=rps27a PE=2 SV=1;>tr|B0R193|B0R193_DANRE Novel protein OS=Danio rerio GN=ubb PE=4 SV=1;>tr|Q3B7P7|Q3B7P7_DANRE Ubiquitin A-52 residue ribosomal protein fusion product 1 OS=Danio re	7	8	45.3	0	4284400000	3892000000	964240000	1042100000	1580200000	1769200000	6110900000	13088000000	9233200000	100720000	731320000	1305000000
Q7ZUG5	Q7ZUG5	rps21	>sp|Q7ZUG5|RS21_DANRE 40S ribosomal protein S21 OS=Danio rerio GN=rps21 PE=2 SV=1	1	2	29.6	6.9233e-22	NA	NA	NA	NA	NA	NA	NA	NA	47990000	NA	NA	NA
Q7ZUG6;Q1L8Q7	Q7ZUG6;Q1L8Q7	rpl30	>tr|Q7ZUG6|Q7ZUG6_DANRE Novel protein (Zgc:56640) OS=Danio rerio GN=rpl30 PE=2 SV=1;>tr|Q1L8Q7|Q1L8Q7_DANRE Novel protein (Zgc:56640) OS=Danio rerio GN=rpl30 PE=2 SV=1	2	2	17.1	5.9626e-07	NA	NA	NA	NA	NA	NA	10176000	NA	NA	NA	NA	NA
Q7ZV05;A9C3W5	Q7ZV05;A9C3W5	rps11;si:dkey-159f12.2	>tr|Q7ZV05|Q7ZV05_DANRE Ribosomal protein S11 OS=Danio rerio GN=rps11 PE=2 SV=1;>tr|A9C3W5|A9C3W5_DANRE Novel protein similar to ribosomal protein S11 (Rps11) (Fragment) OS=Danio rerio GN=si:dkey-159f12.2 PE=4 SV=1	2	10	48.4	3.1876e-22	148950000	116490000	144230000	NA	NA	NA	364320000	287160000	363900000	NA	NA	NA
Q7ZV77	Q7ZV77	psma4	>tr|Q7ZV77|Q7ZV77_DANRE Proteasome subunit alpha type OS=Danio rerio GN=psma4 PE=2 SV=1	1	4	21.5	1.0877e-10	16585000	NA	NA	52778000	66518000	NA	NA	NA	NA	NA	NA	NA
Q7ZV82	Q7ZV82	rpl27	>sp|Q7ZV82|RL27_DANRE 60S ribosomal protein L27 OS=Danio rerio GN=rpl27 PE=2 SV=3	1	4	27.2	1.8207e-08	NA	NA	89148000	NA	NA	NA	113400000	NA	106490000	NA	NA	NA
Q7ZVF9;F1QC15	Q7ZVF9	actbb	>sp|Q7ZVF9|ACTB2_DANRE Actin, cytoplasmic 2 OS=Danio rerio GN=actbb PE=2 SV=2	2	22	63.7	0	441920000	481430000	331680000	1850500000	2037400000	1709400000	144460000	329340000	456000000	13600000000	1493000000	410680000
Q7ZVK5;E9QJ25	Q7ZVK5	pcbp2	>tr|Q7ZVK5|Q7ZVK5_DANRE Pcbp2 protein OS=Danio rerio GN=pcbp2 PE=2 SV=1	2	7	29.9	5.6232e-59	62623000	51883000	45262000	NA	NA	NA	142070000	111570000	139350000	NA	NA	NA
Q7ZVM6;E9QEY1	Q7ZVM6	tia1l	>tr|Q7ZVM6|Q7ZVM6_DANRE Cytotoxic granule-associated RNA binding protein 1, like OS=Danio rerio GN=tia1l PE=2 SV=1	2	11	39.2	8.1682e-298	1439400000	710210000	533760000	50282000	78536000	48389000	939470000	521270000	537600000	NA	NA	NA
Q7ZVY0	Q7ZVY0	tia1	>tr|Q7ZVY0|Q7ZVY0_DANRE Cytotoxic granule-associated RNA binding protein 1 OS=Danio rerio GN=tia1 PE=2 SV=1	1	13	44	0	6083000000	4939700000	3818300000	121350000	462610000	36718000	2576700000	3296300000	4051200000	NA	529630000	NA
Q7ZW09;F1QMR5	Q7ZW09	hnrpl	>tr|Q7ZW09|Q7ZW09_DANRE Heterogeneous nuclear ribonucleoprotein L OS=Danio rerio GN=hnrpl PE=2 SV=1	2	15	35.3	2.0369e-150	170410000	124290000	143010000	NA	NA	NA	674570000	325770000	687170000	NA	NA	NA
Q7ZW95	Q7ZW95	rpl4	>tr|Q7ZW95|Q7ZW95_DANRE Ribosomal protein L4 OS=Danio rerio GN=rpl4 PE=2 SV=1	1	14	40	5.6491e-56	234540000	276870000	262310000	NA	NA	NA	756740000	535240000	370280000	NA	NA	NA
Q7ZWA3;E9QBG3;Q7ZWA3-2;F8W5K3	Q7ZWA3;E9QBG3;Q7ZWA3-2;F8W5K3	rbmx	>sp|Q7ZWA3|RBMX_DANRE RNA-binding motif protein, X chromosome OS=Danio rerio GN=rbmx PE=2 SV=1;>tr|E9QBG3|E9QBG3_DANRE RNA-binding motif protein, X-linked OS=Danio rerio GN=rbmx PE=4 SV=1;>sp|Q7ZWA3-2|RBMX_DANRE Isoform 2 of RNA-binding motif protein, X ch	4	10	29.6	5.7395e-40	174080000	168830000	196480000	NA	NA	NA	257800000	157010000	254660000	NA	NA	NA
Q7ZWJ4;F8W484	Q7ZWJ4	rpl18a	>sp|Q7ZWJ4|RL18A_DANRE 60S ribosomal protein L18a OS=Danio rerio GN=rpl18a PE=2 SV=1	2	6	34.7	1.9736e-54	118700000	189970000	219060000	NA	NA	NA	486120000	283200000	302920000	NA	NA	NA
Q7ZWJ7	Q7ZWJ7	rpl34	>sp|Q7ZWJ7|RL34_DANRE 60S ribosomal protein L34 OS=Danio rerio GN=rpl34 PE=2 SV=3	1	5	37.6	1.8609e-11	105790000	120800000	237680000	NA	NA	NA	309830000	204940000	169580000	NA	NA	NA
Q800H6;F1QTW8	Q800H6	matr3l1.1	>tr|Q800H6|Q800H6_DANRE Matrin 3-like 1.2 OS=Danio rerio GN=matr3l1.1 PE=2 SV=2	2	17	18.1	1.1133e-105	54956000	49709000	134940000	NA	NA	NA	166170000	157670000	252930000	NA	NA	NA
Q801U4;Q801U3	Q801U4;Q801U3	srsf3a	>tr|Q801U4|Q801U4_DANRE Serine/arginine-rich splicing factor 3a OS=Danio rerio GN=srsf3a PE=4 SV=1;>tr|Q801U3|Q801U3_DANRE Serine/arginine-rich splicing factor 3a OS=Danio rerio GN=srsf3a PE=2 SV=1	2	5	34.8	1.4457e-32	NA	NA	NA	NA	NA	NA	NA	NA	54510000	NA	NA	NA
Q802C7	Q802C7	tardbp	>tr|Q802C7|Q802C7_DANRE TAR DNA binding protein OS=Danio rerio GN=tardbp PE=2 SV=1	1	18	51.5	0	2706600000	3041300000	1553600000	NA	NA	NA	2483300000	1752500000	2448100000	NA	NA	NA
Q802C9;A5WVT8;Q7ZU67;F1R166	Q802C9;A5WVT8;Q7ZU67;F1R166	eif4a1a;eif4a1b;eif4a2	>tr|Q802C9|Q802C9_DANRE Eukaryotic translation initiation factor 4A, isoform 1A OS=Danio rerio GN=eif4a1a PE=2 SV=1;>tr|A5WVT8|A5WVT8_DANRE Novel protein similar to vertebrate eukaryotic translation initiation factor 4A, isoform 2 (EIF4A2, zgc:63783) (Frag	4	6	17.5	1.017e-31	54986000	35000000	90804000	NA	NA	NA	34525000	58179000	70836000	NA	NA	NA
Q802Y1;F1QNQ3	Q802Y1	srsf4	>tr|Q802Y1|Q802Y1_DANRE Novel protein (Zgc:55809) OS=Danio rerio GN=srsf4 PE=2 SV=1	2	3	8.2	6.7977e-07	NA	NA	NA	NA	NA	NA	32760000	20312000	18209000	NA	NA	NA
Q802Z0	Q802Z0	ythdf1	>tr|Q802Z0|Q802Z0_DANRE Novel protein similar to vertebrate YTH domain family, member (Zgc:55657) OS=Danio rerio GN=ythdf1 PE=2 SV=1	1	5	9.8	1.91e-21	NA	NA	NA	NA	NA	NA	NA	74351000	107410000	NA	NA	NA
Q802Z5;A2BGU3	Q802Z5;A2BGU3	nono	>tr|Q802Z5|Q802Z5_DANRE Non-POU domain containing, octamer-binding OS=Danio rerio GN=nono PE=2 SV=1;>tr|A2BGU3|A2BGU3_DANRE Non-POU domain containing, octamer-binding (Fragment) OS=Danio rerio GN=nono PE=4 SV=1	2	8	19.7	1.3372e-24	NA	NA	NA	NA	NA	NA	24777000	22320000	17756000	NA	NA	NA
Q803F6	Q803F6	rpsa	>sp|Q803F6|RSSA_DANRE 40S ribosomal protein SA OS=Danio rerio GN=rpsa PE=2 SV=1	1	4	13	5.0806e-28	NA	NA	NA	NA	NA	NA	12779000	10279000	26077000	NA	NA	NA
Q803L0;A5PMB5	Q803L0	lin28a	>sp|Q803L0|LN28A_DANRE Protein lin-28 homolog A OS=Danio rerio GN=lin28a PE=1 SV=1	2	3	19.3	1.0875e-39	NA	NA	NA	NA	NA	NA	NA	NA	24504000	NA	NA	NA
Q803M8;E9QJ96;Q7T356;F1RBF6;Q5PRD0;Q7ZUM0;Q7T3G2;Q6PC29;E7F354	Q803M8;E9QJ96;Q7T356;F1RBF6;Q5PRD0;Q7ZUM0;Q7T3G2;Q6PC29;E7F354	ywhaqb;ywhaba;ywhabb;ywhaqa;ywhah;ywhag1;ywhag2	>tr|Q803M8|Q803M8_DANRE Tryosine 3-monooxygenase/tryptophan 5-monooxygenase activation protein, zeta polypeptide OS=Danio rerio GN=ywhaqb PE=2 SV=1;>tr|E9QJ96|E9QJ96_DANRE Tyrosine 3-monooxygenase/tryptophan 5-monooxygenase activation protein, beta polypep	9	3	11.8	6.9522e-08	12912000	11713000	120550000	44459000	32058000	51946000	NA	18905000	NA	NA	NA	NA
Q803N5;Q6NYX2;E9QET0	Q803N5;Q6NYX2	tardbpl	>tr|Q803N5|Q803N5_DANRE TAR DNA binding protein, like OS=Danio rerio GN=tardbpl PE=2 SV=1;>tr|Q6NYX2|Q6NYX2_DANRE TAR DNA binding protein, like OS=Danio rerio GN=tardbpl PE=2 SV=1	3	18	71	0	1574500000	2630100000	2534500000	NA	298040000	240930000	2430300000	2548100000	3012300000	NA	159620000	NA
Q803T5	Q803T5	ahcy	>tr|Q803T5|Q803T5_DANRE Adenosylhomocysteinase OS=Danio rerio GN=ahcy PE=2 SV=1	1	3	9	2.1781e-10	NA	NA	NA	NA	NA	NA	NA	NA	NA	11964000	NA	NA
Q8AW82	Q8AW82	pa2g4a	>tr|Q8AW82|Q8AW82_DANRE Novel protein similar to human proliferation-associated 2G4 protein (PA2G4) OS=Danio rerio GN=pa2g4a PE=2 SV=1	1	6	17.3	2.134e-36	NA	NA	NA	NA	NA	NA	87512000	58771000	60242000	NA	NA	NA
Q8AX99;D1GJ56;E9QFR8;F1Q9X1	Q8AX99;D1GJ56;E9QFR8;F1Q9X1	actn3b;actn3a;actn2	>tr|Q8AX99|Q8AX99_DANRE Actinin alpha 3b OS=Danio rerio GN=actn3b PE=2 SV=1;>tr|D1GJ56|D1GJ56_DANRE Actinin alpha 3a OS=Danio rerio GN=actn3a PE=2 SV=1;>tr|E9QFR8|E9QFR8_DANRE Actinin, alpha 2 OS=Danio rerio GN=actn2 PE=4 SV=1;>tr|F1Q9X1|F1Q9X1_DANRE Actin	4	4	5.2	1.3592e-35	NA	NA	NA	NA	NA	NA	NA	NA	NA	38257000	NA	NA
Q8JGS9;E9QJF2;E9QHH6	Q8JGS9;E9QJF2	rps18	>sp|Q8JGS9|RS18_DANRE 40S ribosomal protein S18 OS=Danio rerio GN=rps18 PE=2 SV=1;>tr|E9QJF2|E9QJF2_DANRE Ribosomal protein S18 OS=Danio rerio GN=rps18 PE=3 SV=1	3	7	42.8	2.749e-27	177110000	164780000	350530000	NA	NA	NA	256910000	157550000	536070000	NA	NA	NA
Q8JHJ1	Q8JHJ1	rpl35	>sp|Q8JHJ1|RL35_DANRE 60S ribosomal protein L35 OS=Danio rerio GN=rpl35 PE=2 SV=3	1	2	14.6	1.5264e-05	NA	NA	NA	NA	NA	NA	104830000	NA	33604000	NA	NA	NA
Q8UVX0;Q8UVX0-2;F1QZQ2;E9QHH1	Q8UVX0	piwil1	>sp|Q8UVX0|PIWL1_DANRE Piwi-like protein 1 OS=Danio rerio GN=piwil1 PE=1 SV=1	4	11	14	2.9409e-43	60390000	35383000	NA	NA	NA	NA	141490000	92153000	226020000	NA	NA	NA
Q9DFG8;E7EXK8;F1Q8N8	Q9DFG8;E7EXK8;F1Q8N8	mkrn2	>sp|Q9DFG8|MKRN2_DANRE Probable E3 ubiquitin-protein ligase makorin-2 OS=Danio rerio GN=mkrn2 PE=2 SV=2;>tr|E7EXK8|E7EXK8_DANRE Makorin, ring finger protein, 2 OS=Danio rerio GN=mkrn2 PE=4 SV=1;>tr|F1Q8N8|F1Q8N8_DANRE Makorin, ring finger protein, 2 OS=Dan	3	2	6.8	8.5397e-05	NA	NA	NA	NA	NA	NA	NA	30568000	30326000	NA	NA	NA
Q9PTK4	Q9PTK4	hug	>tr|Q9PTK4|Q9PTK4_DANRE HuG OS=Danio rerio GN=hug PE=2 SV=1	1	17	66.1	0	2679100000	1670000000	2096200000	NA	NA	NA	1839200000	1886600000	2402500000	NA	NA	NA
Q9PU62;F1QFA4;F1QQ23;Q6P3H0;E7F3S4;F1RCP3;F1QH59	Q9PU62;F1QFA4	cth1	>tr|Q9PU62|Q9PU62_DANRE Cth1 OS=Danio rerio GN=cth1 PE=2 SV=1;>tr|F1QFA4|F1QFA4_DANRE Cth1 (Fragment) OS=Danio rerio GN=cth1 PE=4 SV=1	7	8	21.6	1.8231e-63	203730000	153240000	89971000	NA	NA	NA	851190000	217660000	384720000	NA	NA	NA
Q9PW28	Q9PW28	eif4e1b	>sp|Q9PW28|IF4EB_DANRE Eukaryotic translation initiation factor 4E-1B OS=Danio rerio GN=eif4e1b PE=2 SV=1	1	3	14.5	3.8589e-07	65790000	44985000	NA	NA	NA	NA	NA	NA	NA	NA	NA	NA
Q9PW80;E9QJD2	Q9PW80	igf2bp3	>sp|Q9PW80|IF2B3_DANRE Insulin-like growth factor 2 mRNA-binding protein 3 OS=Danio rerio GN=igf2bp3 PE=1 SV=1	2	33	56.4	0	11913000000	10320000000	10264000000	93592000	373470000	321200000	19015000000	19452000000	22138000000	NA	1326300000	451650000

## Sheet: ST2A_preZGA UV+ enriched
Supplemental Table S2A. List of preZGA UV + enriched protein groups with raw values from triplicate samples, FDR=0.01
# Label-free quantification (LFQ) protein intensities for each replicate sample of UV irradiiated (UV+) and non-irradiated (UV–) samples for preZGA and ZGA developmental stages are shown for each protein group. Number of identified peptides and amino acid sequence coverage for each of the identified protein group are indicated. The number of identified proteins and their respective names are also…
								preZGA						ZGA
								UV +			UV –			UV +			UV –
Protein.IDs	Majority.protein.IDs	Gene.names	Fasta.headers	Number.of.proteins	Peptides	Sequence.coverage [%]	PEP	LFQ.intensity.rep1	LFQ.intensity.rep2	LFQ.intensity.rep3	LFQ.intensity.rep1	LFQ.intensity.rep2	LFQ.intensity.rep3	LFQ.intensity.rep1	LFQ.intensity.rep2	LFQ.intensity.rep3	LFQ.intensity.rep1	LFQ.intensity.rep2	LFQ.intensity.rep3
A1A5X7;F1R0M4	A1A5X7	zgc:158363	>tr|A1A5X7|A1A5X7_DANRE Zgc:158363 OS=Danio rerio GN=zgc:158363 PE=2 SV=1	2	7	18.7	3.9323e-42	118390000	116910000	268310000	NA	NA	NA	268330000	306650000	365200000	NA	NA	NA
A1A605;F1RB19	A1A605;F1RB19	ybx1	>tr|A1A605|A1A605_DANRE Y box binding protein 1 OS=Danio rerio GN=ybx1 PE=2 SV=1;>tr|F1RB19|F1RB19_DANRE Y box-binding protein 1 OS=Danio rerio GN=ybx1 PE=4 SV=1	2	20	64.7	0	10340000000	11647000000	8170700000	39187000	70719000	NA	13097000000	10523000000	10121000000	NA	493290000	NA
A2BEG2	A2BEG2	trmt2a	>tr|A2BEG2|A2BEG2_DANRE Novel protein (Zgc:55519) OS=Danio rerio GN=trmt2a PE=4 SV=1	1	7	14.4	1.1554e-29	33471000	28352000	NA	NA	NA	NA	NA	NA	NA	NA	NA	NA
A2BHA7;A2BHA8;A2BHA9;A2BHB0;A2BHB2;Q6P0K2;A2BHA6	A2BHA7;A2BHA8;A2BHA9;A2BHB0;A2BHB2;Q6P0K2;A2BHA6	srsf7a	>tr|A2BHA7|A2BHA7_DANRE Novel protein (Zgc:77155) (Fragment) OS=Danio rerio GN=DKEY-85K8.3 PE=4 SV=1;>tr|A2BHA8|A2BHA8_DANRE Novel protein (Zgc:77155) (Fragment) OS=Danio rerio GN=DKEY-85K8.3 PE=4 SV=1;>tr|A2BHA9|A2BHA9_DANRE Novel protein (Zgc:77155) (Fra	7	6	30.7	1.6633e-20	202060000	168980000	230790000	NA	NA	NA	296090000	278610000	298860000	NA	NA	NA
A2CE73;Q6NW56	A2CE73;Q6NW56	khdrbs1a	>tr|A2CE73|A2CE73_DANRE KH domain containing, RNA binding, signal transduction associated 1 OS=Danio rerio GN=khdrbs1a PE=4 SV=1;>tr|Q6NW56|Q6NW56_DANRE KH domain containing, RNA binding, signal transduction associated 1 OS=Danio rerio GN=khdrbs1a PE=2 SV=	2	11	23.3	3.0176e-51	816790000	630490000	631770000	NA	NA	NA	1355900000	1253900000	932170000	NA	532630000	NA
A3KQN8	A3KQN8	si:dkey-119o24.1	>tr|A3KQN8|A3KQN8_DANRE Novel protein similar to vertebrate DEAH (Asp-Glu-Ala-His) box polypeptide 36 (DHX36) OS=Danio rerio GN=si:dkey-119o24.1 PE=4 SV=1	1	3	3.6	4.159e-06	7434800	8349000	NA	NA	NA	NA	NA	NA	NA	NA	NA	NA
A5WVQ1;A5WVQ2;A5WVQ3	A5WVQ1	caprin1b	>tr|A5WVQ1|A5WVQ1_DANRE Cell cycle associated protein 1b OS=Danio rerio GN=caprin1b PE=4 SV=1	3	6	8.8	5.4706e-34	67626000	49922000	117920000	NA	NA	NA	50455000	37909000	109960000	NA	NA	NA
A5WWG5;A5WWG4	A5WWG5;A5WWG4	srsf3b	>tr|A5WWG5|A5WWG5_DANRE Serine/arginine-rich splicing factor 3b OS=Danio rerio GN=srsf3b PE=4 SV=1;>tr|A5WWG4|A5WWG4_DANRE Serine/arginine-rich splicing factor 3b OS=Danio rerio GN=srsf3b PE=4 SV=1	2	5	41.9	2.3205e-37	109210000	127630000	67453000	NA	NA	NA	177670000	112100000	178420000	NA	NA	NA
A8E526	A8E526	rpl14	>tr|A8E526|A8E526_DANRE Ribosomal protein L14 OS=Danio rerio GN=rpl14 PE=2 SV=1	1	3	23.7	4.2605e-12	50224000	59460000	37183000	NA	NA	NA	91208000	81253000	84649000	NA	NA	NA
F1Q577;A8KC22;F1RC33	F1Q577;A8KC22;F1RC33	hnrnpl2	>tr|F1Q577|F1Q577_DANRE Heterogeneous nuclear ribonucleoprotein L2 OS=Danio rerio GN=hnrnpl2 PE=4 SV=1;>tr|A8KC22|A8KC22_DANRE Heterogeneous nuclear ribonucleoprotein L2 OS=Danio rerio GN=hnrnpl2 PE=2 SV=1;>tr|F1RC33|F1RC33_DANRE Heterogeneous nuclear ribo	3	16	45.1	2.5746e-207	1018500000	907910000	846640000	2572700	2470100	6775400	364610000	391480000	520390000	NA	NA	NA
B0R085;B0R086	B0R085;B0R086	zgc:103482	>tr|B0R085|B0R085_DANRE Novel protein similar to H.sapiens SERBP1, SERPINE1 mRNA binding protein 1 (SERBP1, zgc:103482) OS=Danio rerio GN=DKEY-30K6.2 PE=4 SV=1;>tr|B0R086|B0R086_DANRE Novel protein similar to H.sapiens SERBP1, SERPINE1 mRNA binding protein	2	5	26.5	3.6196e-88	57936000	46297000	NA	NA	NA	NA	42222000	60418000	106850000	NA	NA	NA
B0S6P6;B0S6P7	B0S6P6	ddx3	>tr|B0S6P6|B0S6P6_DANRE DEAD (Asp-Glu-Ala-Asp) box polypeptide 3 OS=Danio rerio GN=ddx3 PE=3 SV=1	2	40	58	0	452770000	319250000	363900000	NA	NA	NA	435090000	554860000	392450000	NA	NA	NA
B0S6Z1	B0S6Z1	dhx9	>tr|B0S6Z1|B0S6Z1_DANRE DEAH (Asp-Glu-Ala-His) box polypeptide 9 OS=Danio rerio GN=si:ch211-194i4.1 PE=4 SV=1	1	16	15	2.1578e-76	79674000	19068000	NA	NA	NA	NA	55877000	93043000	151830000	NA	NA	NA
F1QQ31;B0UYI3	F1QQ31;B0UYI3	mrpl37	>tr|F1QQ31|F1QQ31_DANRE Mitochondrial ribosomal protein L37 OS=Danio rerio GN=mrpl37 PE=4 SV=1;>tr|B0UYI3|B0UYI3_DANRE Mitochondrial ribosomal protein L37 OS=Danio rerio GN=mrpl37 PE=4 SV=1	2	15	34.8	1.2807e-128	352660000	758920000	254060000	NA	NA	NA	965290000	534610000	611440000	NA	NA	NA
B0V3S8;F1QRQ0;E7EZM9;B0V3S9	B0V3S8;F1QRQ0;E7EZM9;B0V3S9	myef2	>tr|B0V3S8|B0V3S8_DANRE Myelin expression factor 2 OS=Danio rerio GN=myef2 PE=4 SV=1;>tr|F1QRQ0|F1QRQ0_DANRE Myelin expression factor 2 OS=Danio rerio GN=myef2 PE=4 SV=1;>tr|E7EZM9|E7EZM9_DANRE Myelin expression factor 2 OS=Danio rerio GN=OTTDARG0000002677	4	19	42	1.5131e-301	766210000	946970000	530250000	NA	NA	NA	1222300000	835210000	1192400000	NA	NA	NA
Q642J7;B7ZD34;B7ZD32	Q642J7;B7ZD34;B7ZD32	rps24	>tr|Q642J7|Q642J7_DANRE 40S ribosomal protein S24 OS=Danio rerio GN=rps24 PE=2 SV=1;>tr|B7ZD34|B7ZD34_DANRE 40S ribosomal protein S24 OS=Danio rerio GN=rps24 PE=3 SV=1;>tr|B7ZD32|B7ZD32_DANRE 40S ribosomal protein S24 OS=Danio rerio GN=rps24 PE=3 SV=1	3	4	35.1	5.8978e-22	250060000	NA	135290000	NA	NA	NA	128950000	55284000	190080000	NA	NA	NA
B7ZVC7;F1Q758;E9QB16	B7ZVC7;F1Q758;E9QB16	rbm38	>tr|B7ZVC7|B7ZVC7_DANRE RNA binding motif protein 38 OS=Danio rerio GN=rbm38 PE=2 SV=1;>tr|F1Q758|F1Q758_DANRE RNA-binding motif protein 38 OS=Danio rerio GN=rbm38 PE=4 SV=1;>tr|E9QB16|E9QB16_DANRE RNA-binding motif protein 38 OS=Danio rerio GN=rbm38 PE=4	3	7	23.1	4.9825e-40	225350000	287590000	289660000	NA	NA	NA	246610000	192300000	226100000	NA	NA	NA
F1RER6;B8A516;Q6NWK7;B8A518;Q6NWJ5;E7F244;F1QJ32;F1R6T2;Q6PC95;E7EYT7;Q6DC49;F1QQ90;F1QCY2	F1RER6;B8A516;Q6NWK7;B8A518;Q6NWJ5;E7F244;F1QJ32;F1R6T2;Q6PC95;E7EYT7;Q6DC49;F1QQ90;F1QCY2	tuba1b;tuba1a;tuba1c;tuba8l4;si:ch211-114n24.6;tuba8l2;si:ch73-199e17.1;tuba8l3	>tr|F1RER6|F1RER6_DANRE Tubulin, alpha 1 (Fragment) OS=Danio rerio GN=tuba1 PE=3 SV=1;>tr|B8A516|B8A516_DANRE Tubulin, alpha 1 OS=Danio rerio GN=tuba1 PE=3 SV=1;>tr|Q6NWK7|Q6NWK7_DANRE Tuba1 protein OS=Danio rerio GN=tuba1l2 PE=2 SV=1;>tr|B8A518|B8A518_DAN	13	4	13.2	2.98e-12	NA	4597800	70291000	10644000	NA	NA	NA	NA	NA	NA	NA	NA
B8JIA4;F1QCE7;F1QTM2;F1QBB2	B8JIA4	whsc1	>tr|B8JIA4|B8JIA4_DANRE Novel protein OS=Danio rerio GN=whsc1 PE=4 SV=1	4	3	2.3	5.2477e-06	11057000	9770300	NA	NA	NA	NA	NA	NA	NA	NA	NA	NA
B8JL46;F1R101	B8JL46;F1R101	zgc:158450	>tr|B8JL46|B8JL46_DANRE Novel protein (Zgc:158450) OS=Danio rerio GN=CH73-211A15.2 PE=4 SV=1;>tr|F1R101|F1R101_DANRE Zgc:158450 OS=Danio rerio GN=zgc:158450 PE=4 SV=1	2	15	9.8	5.592e-47	160020000	98238000	106140000	NA	19555000	NA	202990000	127580000	170850000	NA	NA	NA
E7EY75;B8JLQ3;F1R6L6;E9QB18	E7EY75;B8JLQ3;F1R6L6;E9QB18	ncl	>tr|E7EY75|E7EY75_DANRE Nucleolin OS=Danio rerio GN=OTTDARG00000029258 PE=4 SV=1;>tr|B8JLQ3|B8JLQ3_DANRE Novel protein similar to H.sapiens NCL, nucleolin (NCL, zgc:152810) OS=Danio rerio GN=ncl PE=4 SV=1;>tr|F1R6L6|F1R6L6_DANRE Nucleolin OS=Danio rerio GN	4	28	40.1	0	4029900000	3737200000	1906600000	NA	3444300	3346100	4287400000	3389800000	4463400000	NA	425350000	NA
F1QKQ4;B8JMA9;F1QJZ5	F1QKQ4;B8JMA9;F1QJZ5	wdr33	>tr|F1QKQ4|F1QKQ4_DANRE WD repeat domain 33 OS=Danio rerio GN=wdr33 PE=4 SV=1;>tr|B8JMA9|B8JMA9_DANRE WD repeat domain 33 (Fragment) OS=Danio rerio GN=wdr33 PE=4 SV=1;>tr|F1QJZ5|F1QJZ5_DANRE WD repeat domain 33 OS=Danio rerio GN=wdr33 PE=4 SV=1	3	4	9	7.3078e-12	46590000	43191000	39844000	NA	NA	NA	54272000	33757000	27551000	NA	NA	NA
E7EYA6;F1Q664;F1Q663	E7EYA6;F1Q664;F1Q663	fmr1	>tr|E7EYA6|E7EYA6_DANRE Fragile X mental retardation 1 OS=Danio rerio GN=OTTDARG00000020929 PE=4 SV=1;>tr|F1Q664|F1Q664_DANRE Fragile X mental retardation 1 OS=Danio rerio GN=fmr1 PE=4 SV=1;>tr|F1Q663|F1Q663_DANRE Fragile X mental retardation 1 OS=Danio re	3	12	25.6	8.2114e-38	95941000	91093000	71751000	NA	NA	NA	117930000	113280000	186570000	NA	NA	NA
E7EYA8	E7EYA8	CABZ01073334.1	>tr|E7EYA8|E7EYA8_DANRE Uncharacterized protein OS=Danio rerio GN=CABZ01073334.1 PE=4 SV=1	1	12	74.1	0	1195300000	1015600000	683340000	NA	NA	NA	1487600000	1198500000	1169400000	NA	325300000	NA
E7EZV4;A3KQR6;A8HAI7;A3KQR5;F1R0T1;F1QJD7	E7EZV4;A3KQR6;A8HAI7;A3KQR5;F1R0T1;F1QJD7	si:ch211-226h8.14;si:dkey-240e12.6;si:ch211-12h2.6;si:ch73-189n23.1	>tr|E7EZV4|E7EZV4_DANRE Si:ch211-226h8.14 OS=Danio rerio GN=OTTDARG00000012141 PE=4 SV=1;>tr|A3KQR6|A3KQR6_DANRE Novel protein containing galactose binding lectin domain OS=Danio rerio GN=si:dkey-240e12.6 PE=4 SV=1;>tr|A8HAI7|A8HAI7_DANRE Novel protein (Zg	6	4	18.2	6.8461e-10	13957000	24770000	2900900000	NA	13675000	14739000	NA	NA	NA	NA	NA	NA
E7F1G8	E7F1G8	wu:fk48d07	>tr|E7F1G8|E7F1G8_DANRE Uncharacterized protein OS=Danio rerio GN=wu:fk48d07 PE=3 SV=1	1	19	42.4	1.0711e-164	200510000	166050000	86382000	NA	NA	NA	339510000	394020000	379880000	NA	NA	NA
E7F2U7;F1QIH9;F1R9Z1	E7F2U7;F1QIH9;F1R9Z1	zgc:173556	>tr|E7F2U7|E7F2U7_DANRE Uncharacterized protein OS=Danio rerio GN=zgc:173556 PE=4 SV=1;>tr|F1QIH9|F1QIH9_DANRE Zgc:173556 OS=Danio rerio GN=zgc:173556 PE=4 SV=1;>tr|F1R9Z1|F1R9Z1_DANRE Zgc:173556 OS=Danio rerio GN=zgc:173556 PE=4 SV=1	3	9	28.5	1.813e-54	NA	68006000	828680000	NA	NA	NA	NA	NA	NA	NA	NA	NA
E7F304;Q9IBD0;F1R2H3;E9QIE8;Q6P0B1-5;F1QCR6;Q6P0B1-4;Q6P0B1-3;Q6P0B1-2;Q4U0V5;F1QSG1;E7FEV4;Q6P0B1;E7F7K3	E7F304;Q9IBD0;F1R2H3;E9QIE8	celf1	>tr|E7F304|E7F304_DANRE Cugbp, Elav-like family member 1 OS=Danio rerio GN=OTTDARG00000020225 PE=4 SV=1;>sp|Q9IBD0|CELF1_DANRE CUGBP Elav-like family member 1 OS=Danio rerio GN=celf1 PE=1 SV=1;>tr|F1R2H3|F1R2H3_DANRE Cugbp, Elav-like family member 1 OS=Dan	14	17	34.8	0	3807000000	3126200000	3128900000	NA	NA	NA	3422800000	1872200000	3500500000	NA	347660000	NA
E7F3J2	E7F3J2	hnrnpua	>tr|E7F3J2|E7F3J2_DANRE Uncharacterized protein OS=Danio rerio GN=wu:fc51c09 PE=4 SV=1	1	14	20.1	4.7595e-58	88559000	93808000	NA	NA	NA	NA	93901000	125920000	117060000	NA	NA	NA
E7F3K7	E7F3K7	tbrg4	>tr|E7F3K7|E7F3K7_DANRE Transforming growth factor beta regulator 4 OS=Danio rerio GN=OTTDARG00000033339 PE=4 SV=1	1	7	10.3	1.5231e-26	92822000	87584000	63268000	NA	18897000	19902000	97674000	92540000	55864000	NA	NA	NA
E7F3N2	E7F3N2	zar1l	>tr|E7F3N2|E7F3N2_DANRE Im:7158796 OS=Danio rerio GN=im:7158796 PE=4 SV=1	1	8	30.4	1.4364e-23	145980000	99150000	69005000	NA	NA	20564000	NA	53036000	57409000	NA	NA	NA
E7F3R2;F1R1U6	E7F3R2	CU467646.1	>tr|E7F3R2|E7F3R2_DANRE Uncharacterized protein OS=Danio rerio GN=CU467646.1 PE=4 SV=1	2	11	23.5	4.1928e-298	NA	356110000	8525000000	NA	NA	NA	NA	NA	NA	NA	NA	NA
Q6PFQ2;F1QUG5;E7F475	Q6PFQ2;F1QUG5;E7F475	eif3c	>sp|Q6PFQ2|EIF3C_DANRE Eukaryotic translation initiation factor 3 subunit C OS=Danio rerio GN=eif3c PE=1 SV=1;>tr|F1QUG5|F1QUG5_DANRE Eukaryotic translation initiation factor 3, subunit C OS=Danio rerio GN=eif3c PE=4 SV=1;>tr|E7F475|E7F475_DANRE Eukaryotic	3	16	18.5	3.0455e-104	236480000	192530000	302420000	NA	NA	NA	268490000	237510000	668480000	NA	NA	NA
E7F4T4	E7F4T4	zc3h7b	>tr|E7F4T4|E7F4T4_DANRE Zinc finger CCCH-type-containing 7B OS=Danio rerio GN=zc3h7b PE=4 SV=1	1	17	23.9	2.1878e-196	400320000	362520000	121250000	NA	NA	NA	196060000	378930000	346040000	NA	17991000	NA
E9QEK4;E7F889;E9QG76;F1Q718	E9QEK4;E7F889;E9QG76;F1Q718	mrpl45	>tr|E9QEK4|E9QEK4_DANRE Mitochondrial ribosomal protein L45 OS=Danio rerio GN=mrpl45 PE=4 SV=1;>tr|E7F889|E7F889_DANRE Mitochondrial ribosomal protein L45 OS=Danio rerio GN=mrpl45 PE=4 SV=1;>tr|E9QG76|E9QG76_DANRE Mitochondrial ribosomal protein L45 OS=Dan	4	5	15.8	1.055e-09	47776000	55601000	53221000	NA	NA	NA	NA	NA	NA	NA	NA	NA
F1R9Y8;E7F9M4;F1QB10;E9QDS1;E7FCA5	F1R9Y8;E7F9M4;F1QB10	hdlbp	>tr|F1R9Y8|F1R9Y8_DANRE High density lipoprotein-binding protein (vigilin) OS=Danio rerio GN=hdlbp PE=4 SV=1;>tr|E7F9M4|E7F9M4_DANRE High density lipoprotein-binding protein (vigilin) OS=Danio rerio GN=hdlbp PE=4 SV=1;>tr|F1QB10|F1QB10_DANRE High density l	5	39	37.3	0	532630000	267770000	596790000	NA	NA	NA	295460000	249610000	714480000	NA	257000000	NA
E7FAQ8;E7FAB3	E7FAQ8;E7FAB3	zgc:66127	>tr|E7FAQ8|E7FAQ8_DANRE Zgc:66127 OS=Danio rerio GN=zgc:66127 PE=4 SV=1;>tr|E7FAB3|E7FAB3_DANRE Zgc:66127 OS=Danio rerio GN=zgc:66127 PE=4 SV=1	2	9	26.5	3.3752e-52	442700000	413290000	150440000	NA	NA	NA	346230000	431140000	586230000	NA	113310000	NA
E7FAC4	E7FAC4	si:ch211-103b1.2	>tr|E7FAC4|E7FAC4_DANRE Uncharacterized protein OS=Danio rerio PE=4 SV=1	1	13	18.9	1.288e-147	255230000	410860000	94887000	NA	NA	30331000	171620000	249030000	194630000	NA	37709000	NA
E7FAI6	E7FAI6		>tr|E7FAI6|E7FAI6_DANRE Uncharacterized protein OS=Danio rerio PE=4 SV=1	1	9	34.5	0	NA	89251000	3321100000	NA	NA	NA	NA	NA	NA	NA	NA	NA
E7FAV9;Q1LXK4;Q1LXK5	E7FAV9	mov10a	>tr|E7FAV9|E7FAV9_DANRE Moloney leukemia virus 10, homolog, a OS=Danio rerio GN=mov10a PE=4 SV=1	3	15	18	9.233e-91	74349000	98812000	101820000	NA	NA	NA	227610000	111740000	109190000	NA	NA	NA
E7FD91	E7FD91	ddx6	>tr|E7FD91|E7FD91_DANRE DEAD (Asp-Glu-Ala-Asp) box polypeptide 6 OS=Danio rerio GN=ddx6 PE=3 SV=1	1	21	46.6	0	671930000	704570000	244780000	11544000	24704000	14421000	763160000	990790000	779440000	NA	14438000	NA
E7FDR0	E7FDR0	eif4enif1	>tr|E7FDR0|E7FDR0_DANRE Eukaryotic translation initiation factor 4E nuclear import factor 1 OS=Danio rerio GN=eif4enif1 PE=4 SV=1	1	26	32.5	2.205e-300	692360000	254110000	184480000	NA	7390400	6067400	1016800000	273970000	1035300000	NA	NA	NA
E7FFV0	E7FFV0	pum1	>tr|E7FFV0|E7FFV0_DANRE Pumilio homolog 1 (Drosophila) OS=Danio rerio GN=pum1 PE=4 SV=1	1	19	18.5	1.2142e-214	408320000	345960000	427740000	NA	NA	NA	812280000	552530000	652070000	NA	NA	NA
Q9YGX5;E9QB15;A2CE68	Q9YGX5;E9QB15	cpeb1;cpeb1b	>sp|Q9YGX5|CPEB1_DANRE Cytoplasmic polyadenylation element-binding protein 1 OS=Danio rerio GN=cpeb1 PE=1 SV=1;>tr|E9QB15|E9QB15_DANRE Orb/CPEB-related RNA-binding protein OS=Danio rerio GN=zorba PE=4 SV=1	3	12	30.8	0	143680000	140010000	202180000	NA	NA	NA	68412000	85191000	104300000	NA	NA	NA
E9QFH8;E7F3H9;F1R386;E9QCU5	E9QFH8;E7F3H9	csde1	>tr|E9QFH8|E9QFH8_DANRE Si:ch211-261n11.2 OS=Danio rerio GN=si:ch211-261n11.2 PE=4 SV=1;>tr|E7F3H9|E7F3H9_DANRE Si:ch211-261n11.2 OS=Danio rerio GN=OTTDARG00000026582 PE=4 SV=1	4	32	49	0	699730000	947460000	319130000	12051000	17250000	NA	818880000	529080000	1371000000	NA	68220000	NA
F1QTC9;E9QIU2	F1QTC9;E9QIU2	alg13	>tr|F1QTC9|F1QTC9_DANRE Uncharacterized protein OS=Danio rerio PE=4 SV=1;>tr|E9QIU2|E9QIU2_DANRE Uncharacterized protein OS=Danio rerio PE=4 SV=1	2	3	4	3.0527e-08	49511000	47223000	60231000	NA	NA	NA	NA	NA	NA	NA	NA	NA
E9QJJ0;Q7SXQ1	E9QJJ0;Q7SXQ1	tial1	>tr|E9QJJ0|E9QJJ0_DANRE TIA1 cytotoxic granule-associated RNA-binding protein-like 1 OS=Danio rerio GN=tial1 PE=4 SV=1;>tr|Q7SXQ1|Q7SXQ1_DANRE TIA1 cytotoxic granule-associated RNA binding protein-like 1 OS=Danio rerio GN=tial1 PE=2 SV=1	2	11	29.8	1.1688e-280	267040000	277310000	NA	NA	NA	41555000	209090000	127740000	135940000	NA	NA	NA
F1Q4Z8;F8W4V6	F1Q4Z8;F8W4V6	grsf1	>tr|F1Q4Z8|F1Q4Z8_DANRE G-rich RNA sequence-binding factor 1 OS=Danio rerio GN=grsf1 PE=4 SV=1;>tr|F8W4V6|F8W4V6_DANRE G-rich RNA sequence-binding factor 1 OS=Danio rerio GN=grsf1 PE=4 SV=1	2	3	9.5	2.4046e-08	19609000	21087000	NA	NA	NA	NA	NA	NA	NA	NA	NA	NA
Q6NWH7;F1RBJ8;F1Q5L6;B0JZJ1;E9QG17;F1QBS1	Q6NWH7;F1RBJ8;F1Q5L6;B0JZJ1	ddx5	>tr|Q6NWH7|Q6NWH7_DANRE DEAD (Asp-Glu-Ala-Asp) box polypeptide 5 OS=Danio rerio GN=ddx5 PE=2 SV=1;>tr|F1RBJ8|F1RBJ8_DANRE DEAD (Asp-Glu-Ala-Asp) box polypeptide 5 OS=Danio rerio GN=ddx5 PE=3 SV=1;>tr|F1Q5L6|F1Q5L6_DANRE DEAD (Asp-Glu-Ala-Asp) box polypepti	6	12	24.6	1.6487e-40	49303000	48668000	47843000	NA	NA	NA	197780000	135120000	100270000	NA	NA	NA
Q6NXA4;F1Q6Y7;F1QDH0;F1QU46;E9QBB9;F8W5B1;F1R548;A4QN46;F1QB35	Q6NXA4;F1Q6Y7	ilf3;ilf3b	>sp|Q6NXA4|ILF3_DANRE Interleukin enhancer-binding factor 3 homolog OS=Danio rerio GN=ilf3 PE=1 SV=2;>tr|F1Q6Y7|F1Q6Y7_DANRE Interleukin enhancer-binding factor 3b OS=Danio rerio GN=ilf3b PE=4 SV=1	9	24	32.8	1.4954e-241	349080000	265530000	417170000	NA	NA	NA	864980000	577050000	667290000	NA	NA	NA
F1Q6Z5;E9QBN6	F1Q6Z5;E9QBN6	cnbpa	>tr|F1Q6Z5|F1Q6Z5_DANRE Zinc finger protein 9 OS=Danio rerio GN=zff9 PE=4 SV=1;>tr|E9QBN6|E9QBN6_DANRE Zinc finger protein 9 OS=Danio rerio GN=zff9 PE=4 SV=1	2	7	49.1	4.905e-150	320800000	406940000	453030000	NA	NA	NA	726940000	530380000	916410000	NA	NA	NA
F1Q7F1;A5PMI5	F1Q7F1;A5PMI5	papd7	>tr|F1Q7F1|F1Q7F1_DANRE PAP-associated domain-containing 7 OS=Danio rerio GN=papd7 PE=4 SV=1;>tr|A5PMI5|A5PMI5_DANRE Novel protein similar to vertebrate polymerase (DNA directed) sigma (POLS) (Fragment) OS=Danio rerio GN=papd7 PE=4 SV=1	2	11	16.1	4.2761e-33	129030000	113630000	89661000	10736000	26844000	NA	123560000	76360000	76107000	NA	NA	NA
F1Q7F8	F1Q7F8	rbm4.2	>tr|F1Q7F8|F1Q7F8_DANRE RNA binding motif protein 4.2 OS=Danio rerio GN=rbm4.2 PE=4 SV=1	1	16	45.8	5.345e-163	221100000	302360000	343680000	NA	NA	NA	451200000	367590000	665920000	NA	NA	NA
F1Q7H6	F1Q7H6	nxf1	>tr|F1Q7H6|F1Q7H6_DANRE Nuclear RNA export factor 1 OS=Danio rerio GN=nxf1 PE=4 SV=1	1	3	5.6	5.318e-05	8494300	8719700	NA	NA	NA	NA	NA	NA	NA	NA	NA	NA
F1R887;F1Q7L0;F1RBA0	F1R887;F1Q7L0;F1RBA0	vtg4	>tr|F1R887|F1R887_DANRE Vitellogenin 4 OS=Danio rerio GN=vtg4 PE=4 SV=1;>tr|F1Q7L0|F1Q7L0_DANRE Vitellogenin 4 (Fragment) OS=Danio rerio GN=vtg4 PE=4 SV=1;>tr|F1RBA0|F1RBA0_DANRE Vitellogenin 4 OS=Danio rerio GN=vtg4 PE=4 SV=1	3	66	52.1	0	57440000	385560000	128350000	12505000	40477000	NA	1575800000	355910000	252850000	NA	306170000	179640000
F1Q898;F1R1G0	F1Q898	lsm14b	>tr|F1Q898|F1Q898_DANRE LSM14B, SCD6 homolog B (S. cerevisiae) OS=Danio rerio GN=lsm14b PE=4 SV=1	2	22	62.9	0	2296000000	2352700000	1929600000	16816000	67403000	96433000	7181700000	4654200000	5181000000	NA	305070000	143040000
F1Q8A5	F1Q8A5	hnrnpd	>tr|F1Q8A5|F1Q8A5_DANRE Heterogeneous nuclear ribonucleoprotein D OS=Danio rerio GN=hnrnpd PE=4 SV=1	1	11	28	3.2241e-92	1217800000	1188200000	839740000	NA	17733000	NA	883700000	905660000	1038800000	NA	NA	NA
F1R183;F1Q8G3;F1QZF7;A5PL92	F1R183;F1Q8G3	eif4bb	>tr|F1R183|F1R183_DANRE Eukaryotic translation initiation factor 4Bb OS=Danio rerio GN=eif4bb PE=4 SV=1;>tr|F1Q8G3|F1Q8G3_DANRE Eukaryotic translation initiation factor 4Bb OS=Danio rerio GN=eif4bb PE=4 SV=1	4	18	30.1	1.3793e-164	150170000	97138000	362060000	NA	NA	NA	168290000	148200000	465660000	NA	NA	NA
F1Q931	F1Q931	larp1b	>tr|F1Q931|F1Q931_DANRE Wu:fc76b04 OS=Danio rerio GN=wu:fc76b04 PE=4 SV=1	1	8	9.2	9.1954e-45	34269000	31231000	36586000	NA	NA	NA	56345000	49214000	36256000	NA	NA	NA
F1Q949	F1Q949	cpsf4	>tr|F1Q949|F1Q949_DANRE Uncharacterized protein OS=Danio rerio PE=4 SV=1	1	5	27.7	3.5911e-24	41954000	32931000	NA	NA	NA	NA	32601000	NA	19520000	NA	NA	NA
F1Q9D1	F1Q9D1	alyref	>tr|F1Q9D1|F1Q9D1_DANRE Uncharacterized protein OS=Danio rerio PE=4 SV=1	1	8	30.7	0	50199000	103630000	103210000	NA	NA	NA	362390000	385340000	274970000	NA	NA	NA
F1QSX5;F1QA42	F1QSX5;F1QA42	atxn2l	>tr|F1QSX5|F1QSX5_DANRE Ataxin 2-like OS=Danio rerio GN=atxn2l PE=4 SV=1;>tr|F1QA42|F1QA42_DANRE Ataxin 2-like OS=Danio rerio GN=atxn2l PE=4 SV=1	2	14	17.9	6.4291e-99	88500000	44313000	NA	NA	NA	NA	90642000	175320000	108300000	NA	NA	NA
F1QJ44;F1QAW2;F1QSJ7	F1QJ44;F1QAW2;F1QSJ7	zgc:56304	>tr|F1QJ44|F1QJ44_DANRE Zgc:56304 (Fragment) OS=Danio rerio GN=zgc:56304 PE=4 SV=1;>tr|F1QAW2|F1QAW2_DANRE Zgc:56304 (Fragment) OS=Danio rerio GN=zgc:56304 PE=4 SV=1;>tr|F1QSJ7|F1QSJ7_DANRE Zgc:56304 (Fragment) OS=Danio rerio GN=zgc:56304 PE=4 SV=1	3	12	33.5	9.9238e-65	93248000	63731000	100080000	NA	NA	NA	106040000	97759000	473590000	NA	NA	NA
F1QB54	F1QB54	pabpc1a	>tr|F1QB54|F1QB54_DANRE Poly A binding protein, cytoplasmic 1 a OS=Danio rerio GN=pabpc1a PE=4 SV=1	1	34	59.1	0	2411500000	2186900000	1105500000	NA	6855300	22914000	3500100000	3196800000	2707200000	NA	24826000	NA
Q32LU7;F1QDD8	Q32LU7;F1QDD8	ptcd3	>sp|Q32LU7|PTCD3_DANRE Pentatricopeptide repeat-containing protein 3, mitochondrial OS=Danio rerio GN=ptcd3 PE=2 SV=1;>tr|F1QDD8|F1QDD8_DANRE Pentatricopeptide repeat domain 3 OS=Danio rerio GN=ptcd3 PE=4 SV=1	2	7	13.9	2.253e-60	103390000	72136000	70750000	NA	NA	NA	70266000	88062000	70500000	NA	NA	NA
F1QF96;F1QYE1	F1QF96;F1QYE1	r3hdm1	>tr|F1QF96|F1QF96_DANRE Uncharacterized protein (Fragment) OS=Danio rerio PE=4 SV=1;>tr|F1QYE1|F1QYE1_DANRE Uncharacterized protein (Fragment) OS=Danio rerio PE=4 SV=1	2	8	10.4	2.2027e-28	75559000	44493000	NA	NA	NA	NA	49552000	39801000	51188000	NA	NA	NA
F1QFJ8	F1QFJ8	hnrnph1l	>tr|F1QFJ8|F1QFJ8_DANRE Heterogeneous nuclear ribonucleoprotein H1,-like OS=Danio rerio GN=hnrnph1l PE=4 SV=1	1	11	43.5	0	1516100000	1142800000	987140000	NA	7634400	7158900	1461800000	1717200000	980730000	NA	417510000	127630000
F1QFV2;F1QS20;F1R2T6;F1R4I4	F1QFV2	hnrnpa1	>tr|F1QFV2|F1QFV2_DANRE Heterogeneous nuclear ribonucleoprotein A1 OS=Danio rerio GN=hnrnpa1 PE=4 SV=1	4	18	43.9	0	336410000	228300000	60880000	NA	14899000	NA	267660000	367930000	940810000	NA	140910000	NA
F1QG05;Q5BLD6	F1QG05	ptbp2a	>tr|F1QG05|F1QG05_DANRE Uncharacterized protein OS=Danio rerio PE=4 SV=1	2	15	37.9	2.0569e-157	286880000	295690000	194550000	NA	NA	NA	810700000	352750000	567880000	104790000	88090000	NA
F1QG80	F1QG80	rpl22	>tr|F1QG80|F1QG80_DANRE Zgc:123327 OS=Danio rerio GN=zgc:123327 PE=4 SV=1	1	3	27	5.6203e-29	285390000	345950000	177780000	NA	NA	NA	150740000	211390000	96846000	NA	NA	NA
F1QHJ1	F1QHJ1	rps26l	>tr|F1QHJ1|F1QHJ1_DANRE Ribosomal protein S26,-like OS=Danio rerio GN=rps26l PE=4 SV=1	1	4	34.8	3.4353e-64	502790000	410630000	NA	NA	NA	104030000	616010000	424450000	740080000	NA	NA	NA
F1QIP2	F1QIP2	zgc:55733	>tr|F1QIP2|F1QIP2_DANRE Zgc:55733 OS=Danio rerio GN=zgc:55733 PE=4 SV=1	1	20	55.2	3.548e-189	1828900000	1703500000	2233600000	NA	NA	NA	2506200000	2661300000	2642000000	NA	1845700000	NA
F1QUS3;F1QQQ7;F1R003;F1QMZ0;F1QJ26;F1QNI8	F1QUS3;F1QQQ7;F1R003;F1QMZ0;F1QJ26;F1QNI8	zp2.5;zp2.2;zp2;zp2.3;zp2.6	>tr|F1QUS3|F1QUS3_DANRE Zona pellucida glycoprotein 2.5 OS=Danio rerio GN=zp2.5 PE=4 SV=1;>tr|F1QQQ7|F1QQQ7_DANRE Zona pellucida glycoprotein 2.2 OS=Danio rerio GN=zp2.2 PE=4 SV=1;>tr|F1R003|F1R003_DANRE Zona pellucida glycoprotein 2 OS=Danio rerio GN=zp2	6	10	23.4	3.3013e-204	NA	386140000	2734900000	NA	NA	NA	NA	NA	NA	NA	NA	NA
Q7ZW47;F1QJT6;F1QTC1;F1Q5V4;E9QIB8	Q7ZW47;F1QJT6	stau2	>sp|Q7ZW47|STAU2_DANRE Double-stranded RNA-binding protein Staufen homolog 2 OS=Danio rerio GN=stau2 PE=2 SV=2;>tr|F1QJT6|F1QJT6_DANRE Staufen, RNA binding protein, homolog 2 (Drosophila) OS=Danio rerio GN=stau2 PE=4 SV=1	5	27	50.2	0	771320000	345260000	224970000	NA	4314600	11143000	1756700000	1295200000	1229000000	NA	NA	NA
F1QKB8;Q1LX57;Q1LX58	F1QKB8	si:dkey-24l11.3	>tr|F1QKB8|F1QKB8_DANRE Si:dkey-24l11.3 OS=Danio rerio GN=si:dkey-24l11.3 PE=4 SV=1	3	8	12.2	4.3924e-21	89912000	78901000	147620000	NA	NA	NA	117160000	125610000	124340000	NA	NA	NA
F1QLU3;F1QRS6;Q803J4;F1RCV7;E9QCG8;E9QCK8	F1QLU3;F1QRS6;Q803J4;F1RCV7;E9QCG8	hnrnpc	>tr|F1QLU3|F1QLU3_DANRE Uncharacterized protein OS=Danio rerio PE=4 SV=1;>tr|F1QRS6|F1QRS6_DANRE Uncharacterized protein OS=Danio rerio PE=4 SV=1;>tr|Q803J4|Q803J4_DANRE Uncharacterized protein OS=Danio rerio GN=zgc:55701 PE=2 SV=1;>tr|F1RCV7|F1RCV7_DANRE	6	22	50.5	0	13968000000	13568000000	13314000000	1955900	7808800	5990800	16875000000	15282000000	16648000000	NA	610140000	10882000
F1QML8	F1QML8	akap8l	>tr|F1QML8|F1QML8_DANRE A kinase (PRKA) anchor protein 8-like OS=Danio rerio GN=akap8l PE=4 SV=1	1	15	29.9	3.0415e-75	94118000	175400000	104520000	NA	NA	NA	164150000	129750000	153850000	NA	NA	NA
F1QQ28;F1R2E7	F1QQ28	eif4h	>tr|F1QQ28|F1QQ28_DANRE Eukaryotic translation initiation factor 4h OS=Danio rerio GN=eif4h PE=4 SV=1	2	12	51.5	0	407310000	263160000	352840000	NA	NA	NA	697640000	795870000	1693900000	NA	NA	NA
F1QRD4;Q66HY6	F1QRD4;Q66HY6	ncoa5	>tr|F1QRD4|F1QRD4_DANRE Zgc:92194 OS=Danio rerio GN=zgc:92194 PE=4 SV=1;>tr|Q66HY6|Q66HY6_DANRE Zgc:92194 OS=Danio rerio GN=zgc:92194 PE=2 SV=1	2	10	17.8	4.1688e-28	93310000	44467000	76078000	NA	NA	NA	113790000	99692000	99555000	NA	NA	NA
F1QS28	F1QS28	hnrnpa0a	>tr|F1QS28|F1QS28_DANRE Zgc:77366 OS=Danio rerio GN=zgc:77366 PE=4 SV=1	1	10	35.4	2.1415e-239	263740000	527420000	420010000	NA	NA	6621400	420400000	440610000	788180000	NA	53665000	NA
F1QTL9;F8W265	F1QTL9;F8W265	hnrnpa0b	>tr|F1QTL9|F1QTL9_DANRE Heterogeneous nuclear ribonucleoprotein A0 OS=Danio rerio GN=hnrnpa0 PE=4 SV=1;>tr|F8W265|F8W265_DANRE Heterogeneous nuclear ribonucleoprotein A0 (Fragment) OS=Danio rerio GN=hnrnpa0 PE=4 SV=1	2	9	35.4	0	1167700000	819660000	482160000	8041400	13757000	8048600	1779100000	1346200000	2644700000	NA	571670000	127120000
F1QTW6;F1R2S5;F1QHH9	F1QTW6;F1R2S5	vtg5	>tr|F1QTW6|F1QTW6_DANRE Vitellogenin 5 OS=Danio rerio GN=vtg5 PE=4 SV=1;>tr|F1R2S5|F1R2S5_DANRE Vitellogenin 5 (Fragment) OS=Danio rerio GN=vtg5 PE=4 SV=1	3	65	51.5	0	110240000	625610000	67854000	NA	NA	NA	1648400000	427450000	935580000	NA	NA	NA
Q498Z6;F1QUB2	Q498Z6;F1QUB2	mrps7	>sp|Q498Z6|RT07_DANRE 28S ribosomal protein S7, mitochondrial OS=Danio rerio GN=mrps7 PE=2 SV=1;>tr|F1QUB2|F1QUB2_DANRE Mitochondrial ribosomal protein S7 OS=Danio rerio GN=mrps7 PE=4 SV=1	2	5	28.5	2.9799e-56	10364000	7716700	NA	NA	NA	NA	NA	NA	NA	NA	NA	NA
F1QV15;F1R992;F1R2S0	F1QV15	vtg6	>tr|F1QV15|F1QV15_DANRE Si:rp71-23d18.1 (Fragment) OS=Danio rerio GN=si:rp71-23d18.1 PE=4 SV=1	3	65	48.9	0	18354000	101430000	NA	NA	7230900	NA	474890000	200250000	252280000	NA	NA	NA
F1QVC6	F1QVC6	srsf9	>tr|F1QVC6|F1QVC6_DANRE Serine/arginine-rich splicing factor 9 OS=Danio rerio GN=srsf9 PE=4 SV=1	1	8	30.6	7.058e-20	52952000	58144000	NA	NA	NA	NA	63683000	66258000	72363000	NA	NA	NA
F1QWB4;B0UXJ3	F1QWB4;B0UXJ3	hnrnpk	>tr|F1QWB4|F1QWB4_DANRE Heterogeneous nuclear ribonucleoprotein K OS=Danio rerio GN=hnrnpk PE=4 SV=1;>tr|B0UXJ3|B0UXJ3_DANRE Heterogeneous nuclear ribonucleoprotein K (Fragment) OS=Danio rerio GN=hnrnpk PE=4 SV=1	2	16	45.5	6.6549e-123	187590000	146790000	345390000	NA	NA	NA	632670000	516020000	426900000	NA	NA	NA
F5H8N4;F1QWU3;E7F6Q6	F5H8N4;F1QWU3	lrpprc	>tr|F5H8N4|F5H8N4_DANRE Leucine-rich PPR-motif-containing (Fragment) OS=Danio rerio GN=lrpprc PE=4 SV=1;>tr|F1QWU3|F1QWU3_DANRE Leucine-rich PPR-motif-containing OS=Danio rerio GN=lrpprc PE=4 SV=1	3	59	43.9	0	3573900000	3674500000	2819600000	1655800	8203600	8004400	2147200000	2229800000	2287600000	NA	23344000	NA
Q4KM14;F1QXG2	Q4KM14;F1QXG2	trnau1apl;trnau1apb	>sp|Q4KM14|TSP1L_DANRE tRNA selenocysteine 1-associated protein 1-like OS=Danio rerio GN=trnau1apl PE=2 SV=1;>tr|F1QXG2|F1QXG2_DANRE tRNA selenocysteine 1-associated protein 1,-like OS=Danio rerio GN=trnau1apl PE=4 SV=1	2	4	13	1.9105e-22	68650000	62706000	78201000	NA	NA	NA	NA	NA	114980000	NA	NA	NA
F1QXG4;Q5RGK8;Q7ZT42;Q7ZT42-2;Q7ZT42-3	F1QXG4;Q5RGK8;Q7ZT42;Q7ZT42-2;Q7ZT42-3	snd1	>tr|F1QXG4|F1QXG4_DANRE Staphylococcal nuclease domain-containing 1 OS=Danio rerio GN=snd1 PE=4 SV=1;>tr|Q5RGK8|Q5RGK8_DANRE Staphylococcal nuclease domain containing 1 OS=Danio rerio GN=snd1 PE=2 SV=2;>sp|Q7ZT42|SND1_DANRE Staphylococcal nuclease domain-c	5	31	36.2	3.6646e-231	449810000	284520000	743530000	NA	NA	NA	659950000	402000000	858100000	NA	137530000	NA
F1QXP8;H0WEH3	F1QXP8	khsrp	>tr|F1QXP8|F1QXP8_DANRE KH-type-splicing regulatory protein OS=Danio rerio GN=khsrp PE=4 SV=1	2	30	56.9	0	4246700000	4603300000	5045200000	3168900	NA	NA	6445000000	2387700000	7745300000	NA	85655000	NA
Q6NUZ3;F1QY96;F6NN54	Q6NUZ3;F1QY96;F6NN54	syncrip	>tr|Q6NUZ3|Q6NUZ3_DANRE Synaptotagmin binding, cytoplasmic RNA interacting protein OS=Danio rerio GN=syncrip PE=2 SV=1;>tr|F1QY96|F1QY96_DANRE Synaptotagmin-binding, cytoplasmic RNA-interacting protein OS=Danio rerio GN=syncrip PE=4 SV=1;>tr|F6NN54|F6NN54_	3	17	32.2	0	923010000	833760000	203530000	34390000	65560000	58099000	871840000	1143300000	892710000	NA	229500000	NA
F1QZC1	F1QZC1	rbfox2	>tr|F1QZC1|F1QZC1_DANRE RNA-binding protein, fox-1 homolog (C. elegans) 2 OS=Danio rerio GN=rbfox2 PE=4 SV=1	1	5	18.7	6.0084e-18	137740000	114900000	156790000	NA	NA	NA	245260000	155510000	180140000	NA	NA	NA
F1QZN1;F1QED0	F1QZN1;F1QED0	fubp3	>tr|F1QZN1|F1QZN1_DANRE Zgc:101598 (Fragment) OS=Danio rerio GN=zgc:101598 PE=4 SV=1;>tr|F1QED0|F1QED0_DANRE Zgc:101598 (Fragment) OS=Danio rerio GN=zgc:101598 PE=4 SV=1	2	13	48.7	0	1958000000	1928400000	2686900000	43993000	NA	5615700	4238100000	3111100000	3598400000	NA	NA	NA
F1R331;F1QZT4;F1RDM4	F1R331;F1QZT4	zgc:152816	>tr|F1R331|F1R331_DANRE Zgc:152816 OS=Danio rerio GN=zgc:152816 PE=4 SV=1;>tr|F1QZT4|F1QZT4_DANRE Zgc:152816 OS=Danio rerio GN=zgc:152816 PE=4 SV=1	3	15	22.5	4.5247e-180	149450000	144260000	367430000	NA	NA	NA	182600000	92135000	188200000	NA	NA	NA
F1QZW7;F1QRI4	F1QZW7	ilf3a	>tr|F1QZW7|F1QZW7_DANRE Interleukin enhancer binding factor 3a OS=Danio rerio GN=ilf3a PE=4 SV=1	2	20	31.5	3.0498e-187	66427000	83540000	64508000	NA	NA	NA	69142000	146300000	168720000	NA	NA	NA
F1R0Y4;F1QLY3	F1R0Y4;F1QLY3	fam98a	>tr|F1R0Y4|F1R0Y4_DANRE Family with sequence similarity 98, member A (Fragment) OS=Danio rerio GN=fam98a PE=4 SV=1;>tr|F1QLY3|F1QLY3_DANRE Family with sequence similarity 98, member A (Fragment) OS=Danio rerio GN=fam98a PE=4 SV=1	2	3	8.7	2.5037e-43	27441000	25293000	NA	NA	NA	NA	NA	NA	NA	NA	NA	NA
F1R2E0;E9QEE4;Q1LVZ5;F8W2D3	F1R2E0;E9QEE4	hnrnpm	>tr|F1R2E0|F1R2E0_DANRE Heterogeneous nuclear ribonucleoprotein M OS=Danio rerio GN=hnrnpm PE=4 SV=2;>tr|E9QEE4|E9QEE4_DANRE Heterogeneous nuclear ribonucleoprotein M OS=Danio rerio GN=hnrnpm PE=4 SV=1	4	34	57.2	0	1119700000	642890000	2095800000	NA	NA	17364000	1306400000	733490000	2638000000	236970000	NA	NA
Q1MTC6;F1R2T3;F1R743	Q1MTC6;F1R2T3	vtg7	>tr|Q1MTC6|Q1MTC6_DANRE Novel protein similar to vitellogenin 1 (Vg1) OS=Danio rerio GN=vtg7 PE=4 SV=1;>tr|F1R2T3|F1R2T3_DANRE Vitellogenin 7 OS=Danio rerio GN=vtg7 PE=4 SV=1	3	62	49.4	0	25321000	267020000	105820000	17715000	14960000	34873000	809420000	156680000	384480000	NA	533930000	184600000
F1R368	F1R368	wu:fc56b07	>tr|F1R368|F1R368_DANRE Wu:fc56b07 (Fragment) OS=Danio rerio GN=wu:fc56b07 PE=4 SV=1	1	4	12.9	1.3464e-08	15076000	17420000	NA	NA	NA	NA	33291000	33862000	20757000	NA	NA	NA
F1R3J9;F1QFJ1	F1R3J9;F1QFJ1	prmt1	>tr|F1R3J9|F1R3J9_DANRE Protein arginine methyltransferase 1 OS=Danio rerio GN=prmt1 PE=4 SV=1;>tr|F1QFJ1|F1QFJ1_DANRE Protein arginine methyltransferase 1 (Fragment) OS=Danio rerio GN=prmt1 PE=4 SV=1	2	4	15.2	3.4922e-15	26949000	21060000	NA	NA	NA	NA	NA	NA	NA	NA	NA	NA
F1R6L3;E7EYX7	F1R6L3;E7EYX7	cirbp	>tr|F1R6L3|F1R6L3_DANRE Cold-inducible RNA-binding protein (Fragment) OS=Danio rerio GN=cirbp PE=4 SV=1;>tr|E7EYX7|E7EYX7_DANRE Cold inducible RNA binding protein OS=Danio rerio GN=OTTDARG00000010532 PE=4 SV=1	2	12	48.2	0	11750000000	13638000000	16036000000	105640000	106410000	112060000	15005000000	11571000000	18139000000	NA	1378200000	1301400000
F1R8D7	F1R8D7	syncripl	>tr|F1R8D7|F1R8D7_DANRE Synaptotagmin-binding, cytoplasmic RNA-interacting protein,-like OS=Danio rerio GN=syncripl PE=4 SV=1	1	25	53	0	6418500000	8276000000	3464300000	268500000	370310000	322380000	5715900000	9986800000	8707800000	NA	4562100000	4330800000
F1RCB2	F1RCB2	pl10	>tr|F1RCB2|F1RCB2_DANRE Pl10 OS=Danio rerio GN=pl10 PE=3 SV=1	1	43	67	0	3913700000	3021800000	3083600000	8798100	21569000	12239000	1743400000	2590800000	2441700000	3062200	83276000	NA
F1RCY6	F1RCY6	upf1	>tr|F1RCY6|F1RCY6_DANRE Upf1 regulator of nonsense transcripts homolog (yeast) OS=Danio rerio GN=upf1 PE=4 SV=1	1	26	31.2	4.4826e-145	261890000	415480000	115560000	12171000	15574000	NA	196280000	240390000	187620000	NA	NA	NA
Q6NYG6;F1RDB0	Q6NYG6;F1RDB0	tdrd3	>sp|Q6NYG6|TDRD3_DANRE Tudor domain-containing protein 3 OS=Danio rerio GN=tdrd3 PE=2 SV=1;>tr|F1RDB0|F1RDB0_DANRE Zgc:77174 OS=Danio rerio GN=zgc:77174 PE=4 SV=1	2	9	15.3	1.139e-43	48974000	39144000	60493000	NA	NA	NA	64318000	46979000	94367000	NA	NA	NA
Q6NYU8;F8W4E3;F8W5P8;F8W2Z3;F8W256	Q6NYU8;F8W4E3;F8W5P8;F8W2Z3	hnrnpab	>tr|Q6NYU8|Q6NYU8_DANRE Heterogeneous nuclear ribonucleoprotein A/B OS=Danio rerio GN=hnrnpab PE=2 SV=1;>tr|F8W4E3|F8W4E3_DANRE Heterogeneous nuclear ribonucleoprotein A/B (Fragment) OS=Danio rerio GN=hnrnpab PE=4 SV=1;>tr|F8W5P8|F8W5P8_DANRE Heterogeneous	5	12	32.6	2.4569e-161	1387800000	1507600000	1253500000	NA	10198000	NA	2013100000	2199700000	2397300000	NA	134360000	NA
F8W4X6;Q90Z10	F8W4X6;Q90Z10	rpl13	>tr|F8W4X6|F8W4X6_DANRE 60S ribosomal protein L13 OS=Danio rerio GN=rpl13 PE=3 SV=1;>sp|Q90Z10|RL13_DANRE 60S ribosomal protein L13 OS=Danio rerio GN=rpl13 PE=2 SV=3	2	4	25.9	5.1872e-70	19947000	25310000	65667000	NA	NA	NA	NA	NA	NA	NA	NA	NA
Q7ZVR8;G1K2G8;Q7ZVR8-2;G1K2P5;A1L1G1	Q7ZVR8;G1K2G8;Q7ZVR8-2;G1K2P5	esrp2	>sp|Q7ZVR8|ESRP2_DANRE Epithelial splicing regulatory protein 2 OS=Danio rerio GN=esrp2 PE=2 SV=2;>tr|G1K2G8|G1K2G8_DANRE Epithelial-splicing regulatory protein 2 OS=Danio rerio GN=esrp2 PE=4 SV=1;>sp|Q7ZVR8-2|ESRP2_DANRE Isoform 2 of Epithelial splicing r	5	13	19.7	1.7208e-103	120270000	54750000	NA	NA	NA	NA	94062000	137770000	77837000	NA	NA	NA
P62247;B5DDE8	P62247	rps8	>sp|P62247|RS8_DANRE 40S ribosomal protein S8 OS=Danio rerio GN=rps8 PE=2 SV=2	2	7	37	1.2602e-75	151460000	128960000	57189000	12294000	36184000	34093000	657860000	327840000	211850000	NA	NA	NA
P79735	P79735	ran	>sp|P79735|RAN_DANRE GTP-binding nuclear protein Ran OS=Danio rerio GN=ran PE=2 SV=1	1	2	9.8	6.1077e-05	15481000	14813000	70403000	17476000	NA	NA	NA	NA	NA	NA	NA	NA
Q08ES4	Q08ES4	btg4	>tr|Q08ES4|Q08ES4_DANRE B-cell translocation gene 4 OS=Danio rerio GN=btg4 PE=2 SV=1	1	3	14.3	1.3524e-06	24466000	26531000	NA	NA	NA	NA	NA	NA	NA	NA	NA	NA
Q1L8R2	Q1L8R2	sfpq	>tr|Q1L8R2|Q1L8R2_DANRE Splicing factor proline/glutamine rich (Polypyrimidine tract binding protein associated) OS=Danio rerio GN=sfpq PE=2 SV=1	1	11	18.7	1.1139e-42	126980000	103330000	119940000	NA	NA	NA	154950000	111260000	121340000	NA	NA	NA
Q7SXD6;Q1L8V7;Q1L8V8	Q7SXD6;Q1L8V7	mrpl3	>tr|Q7SXD6|Q7SXD6_DANRE Mitochondrial ribosomal protein L3 OS=Danio rerio GN=mrpl3 PE=2 SV=1;>tr|Q1L8V7|Q1L8V7_DANRE Mitochondrial ribosomal protein L3 OS=Danio rerio GN=mrpl3 PE=2 SV=1	3	4	15.4	1.6677e-10	26834000	33322000	NA	NA	NA	NA	NA	NA	NA	NA	NA	NA
Q1LUN5;Q9YGW7;Q1LUN6	Q1LUN5;Q9YGW7;Q1LUN6	dazl	>tr|Q1LUN5|Q1LUN5_DANRE Daz-like gene OS=Danio rerio GN=dazl PE=2 SV=1;>sp|Q9YGW7|DAZL_DANRE Deleted in azoospermia-like OS=Danio rerio GN=dazl PE=1 SV=1;>tr|Q1LUN6|Q1LUN6_DANRE Daz-like gene OS=Danio rerio GN=dazl PE=2 SV=1	3	5	29.7	3.0962e-39	541830000	352740000	432800000	NA	NA	NA	244340000	202270000	276480000	NA	NA	NA
Q1LWN2;F1R8M4	Q1LWN2	vtg1	>tr|Q1LWN2|Q1LWN2_DANRE Vitellogenin 1 OS=Danio rerio GN=vtg1 PE=2 SV=1	2	67	51.3	0	1467300000	5738800000	981080000	57684000	352200000	267180000	17784000000	8598700000	10251000000	NA	8870000000	8868100000
Q1MT19;Q6GQM6;F1QLQ7;Q1MT20;Q90409;F1QGR7;F1R133;F1QGN3;Q6P105;F1R0S9	Q1MT19;Q6GQM6;F1QLQ7	elavl2	>tr|Q1MT19|Q1MT19_DANRE ELAV (embryonic lethal, abnormal vision, Drosophila)-like 2 (Hu antigen B) OS=Danio rerio GN=elavl2 PE=2 SV=1;>tr|Q6GQM6|Q6GQM6_DANRE ELAV (embryonic lethal, abnormal vision, Drosophila)-like 2 (Hu antigen B) OS=Danio rerio GN=elavl	10	10	29.9	4.6468e-38	56827000	48590000	47767000	NA	NA	NA	76405000	116010000	126530000	NA	NA	NA
Q1MTC4;F1R876	Q1MTC4	vtg2	>tr|Q1MTC4|Q1MTC4_DANRE Novel protein similar to vitellogenin 1 (Vg1) OS=Danio rerio GN=vtg2 PE=4 SV=1	2	62	43.3	0	105200000	434350000	47240000	NA	45716000	NA	4212700000	1287200000	1812800000	NA	839700000	732450000
Q803E3;Q4QRG0	Q803E3;Q4QRG0	ewsr1b	>tr|Q803E3|Q803E3_DANRE Ewing sarcoma breakpoint region 1b OS=Danio rerio GN=ewsr1b PE=2 SV=1;>tr|Q4QRG0|Q4QRG0_DANRE Ewing sarcoma breakpoint region 1b OS=Danio rerio GN=ewsr1b PE=2 SV=1	2	4	6.2	7.9823e-73	222460000	222020000	192350000	NA	NA	NA	600930000	487430000	542250000	NA	NA	NA
Q503D3	Q503D3	ptbp1a	>tr|Q503D3|Q503D3_DANRE Novel protein similar to vertebrate polypyrimidine tract binding protein 1 (PTBP1, zgc:110689) OS=Danio rerio GN=ptbp1a PE=2 SV=1	1	9	15	5.0039e-101	122630000	83344000	116660000	NA	NA	NA	186100000	136710000	143300000	NA	NA	NA
Q566W6	Q566W6	zgc:112425	>tr|Q566W6|Q566W6_DANRE Zgc:112425 OS=Danio rerio GN=zgc:112425 PE=2 SV=1	1	10	55.1	0	1989800000	1699500000	1026600000	NA	9203100	32138000	2261700000	2453100000	4356600000	NA	153510000	NA
Q567N5	Q567N5	rpl6	>tr|Q567N5|Q567N5_DANRE Ribosomal protein L6 OS=Danio rerio GN=rpl6 PE=2 SV=1	1	7	29.1	4.3215e-136	69829000	169940000	63591000	NA	26017000	NA	611200000	142250000	297110000	NA	NA	NA
Q5BJJ2;F1QBR2	Q5BJJ2	rpl3	>tr|Q5BJJ2|Q5BJJ2_DANRE Ribosomal protein L3 OS=Danio rerio GN=rpl3 PE=2 SV=1	2	6	13.9	1.1938e-13	NA	20593000	38773000	NA	NA	NA	NA	NA	NA	NA	NA	NA
Q5TYP2	Q5TYP2	zp3a.2	>tr|Q5TYP2|Q5TYP2_DANRE Zona pellucida glycoprotein 3a, like OS=Danio rerio GN=zp3a.2 PE=2 SV=1	1	5	16.7	7.1661e-32	NA	39262000	329970000	NA	NA	NA	NA	NA	NA	NA	NA	NA
Q5TYX2;E7FDF8	Q5TYX2	si:dkeyp-50f7.2	>tr|Q5TYX2|Q5TYX2_DANRE Novel protein containing a zona pellucida-like domain (Wu:fi27h02) OS=Danio rerio GN=si:dkeyp-50f7.2 PE=2 SV=1	2	10	9.7	3.1468e-67	NA	48268000	1730200000	NA	NA	NA	NA	NA	NA	NA	NA	NA
Q642H9	Q642H9	rps4x	>sp|Q642H9|RS4X_DANRE 40S ribosomal protein S4, X isoform OS=Danio rerio GN=rps4x PE=2 SV=3	1	9	34.2	9.3043e-26	151610000	111290000	166820000	NA	NA	NA	136430000	244240000	324740000	NA	NA	NA
Q6DBR0	Q6DBR0	rpusd4	>sp|Q6DBR0|RUSD4_DANRE RNA pseudouridylate synthase domain-containing protein 4 OS=Danio rerio GN=rpusd4 PE=2 SV=1	1	3	9.8	8.6405e-06	25940000	31729000	32954000	NA	NA	NA	NA	NA	NA	NA	NA	NA
Q6DHL6	Q6DHL6	rps6	>tr|Q6DHL6|Q6DHL6_DANRE 40S ribosomal protein S6 OS=Danio rerio GN=zgc:92237 PE=2 SV=1	1	4	17.7	2.2915e-21	65084000	62261000	168350000	NA	15563000	20211000	274850000	221830000	433390000	NA	NA	NA
Q6DRC4	Q6DRC4	eif3g	>sp|Q6DRC4|EIF3G_DANRE Eukaryotic translation initiation factor 3 subunit G OS=Danio rerio GN=eif3g PE=1 SV=1	1	8	42	5.4334e-51	84890000	60512000	76280000	NA	NA	NA	108350000	85957000	237420000	NA	NA	NA
Q6NW62;Q08BJ2	Q6NW62	khdrbs1b	>tr|Q6NW62|Q6NW62_DANRE KH domain containing, RNA binding, signal transduction associated 1b OS=Danio rerio GN=khdrbs1b PE=2 SV=1	2	7	17.9	5.312e-21	324200000	302280000	324490000	NA	NA	NA	377500000	300640000	312650000	NA	NA	NA
Q6NWC3;E9QDR0	Q6NWC3	rps2	>tr|Q6NWC3|Q6NWC3_DANRE Ribosomal protein S2 OS=Danio rerio GN=rps2 PE=2 SV=1	2	13	49.3	3.766e-167	1663600000	1541800000	2125500000	12072000	19855000	35916000	1120500000	713160000	2394100000	NA	NA	NA
Q6NWC6;Q6NWC6-2;G8JL13;Q1L8Q3;H0WFE8	Q6NWC6;Q6NWC6-2	cpsf6	>sp|Q6NWC6|CPSF6_DANRE Cleavage and polyadenylation specificity factor subunit 6 OS=Danio rerio GN=cpsf6 PE=2 SV=1;>sp|Q6NWC6-2|CPSF6_DANRE Isoform 2 of Cleavage and polyadenylation specificity factor subunit 6 OS=Danio rerio GN=cpsf6	5	7	18.7	6.4816e-36	43367000	52399000	NA	NA	NA	NA	NA	54522000	47331000	NA	NA	NA
Q6NXC1	Q6NXC1	rbm4.3	>tr|Q6NXC1|Q6NXC1_DANRE RNA binding motif protein 4.3 OS=Danio rerio GN=rbm4.3 PE=2 SV=1	1	26	68	6.4419e-249	1665600000	1629000000	956210000	NA	2201300	23366000	1787900000	1420100000	1441100000	NA	110840000	124510000
Q6NYA1	Q6NYA1	zgc:77052	>tr|Q6NYA1|Q6NYA1_DANRE Zgc:77052 OS=Danio rerio GN=zgc:77052 PE=2 SV=1	1	13	36.6	0	6798200000	6892400000	2179700000	64570000	151980000	129090000	4007600000	3485400000	3661500000	NA	752080000	236050000
Q6NZ06	Q6NZ06	ilf2	>sp|Q6NZ06|ILF2_DANRE Interleukin enhancer-binding factor 2 homolog OS=Danio rerio GN=ilf2 PE=2 SV=1	1	10	30.2	1.0124e-134	93995000	121860000	25280000	NA	NA	NA	111780000	182390000	99663000	NA	NA	NA
Q6NZS4	Q6NZS4	zgc:76871	>sp|Q6NZS4|RTCB_DANRE tRNA-splicing ligase RtcB homolog OS=Danio rerio GN=zgc:76871 PE=2 SV=1	1	6	14.5	1.5446e-15	30055000	21320000	37111000	NA	NA	NA	51311000	55279000	65166000	NA	NA	NA
Q6P0B2	Q6P0B2	lsm14ab	>tr|Q6P0B2|Q6P0B2_DANRE C19orf13-like protein OS=Danio rerio GN=lsm14ab PE=2 SV=1	1	16	38.2	0	143490000	103790000	95061000	NA	NA	NA	313090000	379100000	394200000	NA	NA	NA
Q6P0G2	Q6P0G2	zgc:77262	>tr|Q6P0G2|Q6P0G2_DANRE Zgc:77262 OS=Danio rerio GN=zgc:77262 PE=2 SV=1	1	11	41.1	1.3319e-43	109950000	119640000	134030000	NA	NA	NA	128840000	95751000	111910000	NA	NA	NA
Q6P0V0	Q6P0V0	hnrnph1	>tr|Q6P0V0|Q6P0V0_DANRE Heterogeneous nuclear ribonucleoprotein H1 OS=Danio rerio GN=hnrnph1 PE=2 SV=1	1	9	31.8	2.3987e-250	169160000	100270000	125850000	NA	NA	NA	91266000	71427000	76255000	NA	NA	NA
Q6P0V6;B0S6P5	Q6P0V6	rpl8	>sp|Q6P0V6|RL8_DANRE 60S ribosomal protein L8 OS=Danio rerio GN=rpl8 PE=2 SV=3	2	11	39.3	1.2437e-79	394720000	749730000	820720000	NA	NA	4896300	1477200000	1303300000	1030600000	NA	NA	NA
Q6P111;F1Q8I5;F1QIS2;F1QIF2	Q6P111;F1Q8I5	lsm14aa	>tr|Q6P111|Q6P111_DANRE LSM14 homolog A (SCD6, S. cerevisiae) OS=Danio rerio GN=lsm14aa PE=1 SV=1;>tr|F1Q8I5|F1Q8I5_DANRE LSM14 homolog Aa (SCD6, S. cerevisiae) OS=Danio rerio GN=lsm14aa PE=4 SV=1	4	18	43.3	0	988210000	1086000000	598760000	10098000	22647000	32728000	972970000	1019200000	1974900000	NA	78256000	NA
Q6P124;F1QJB8;F1QX72;F1QGX3;F1QFP9	Q6P124;F1QJB8	g3bp1	>tr|Q6P124|Q6P124_DANRE GTPase activating protein (SH3 domain) binding protein 1 OS=Danio rerio GN=g3bp1 PE=2 SV=1;>tr|F1QJB8|F1QJB8_DANRE GTPase-activating protein (SH3 domain)-binding protein 1 (Fragment) OS=Danio rerio GN=g3bp1 PE=4 SV=1	5	9	22.9	1.016e-36	43118000	30576000	85442000	NA	NA	NA	NA	43428000	131380000	NA	NA	NA
Q6P2A9	Q6P2A9	fubp1	>tr|Q6P2A9|Q6P2A9_DANRE Far upstream element (FUSE) binding protein 1 OS=Danio rerio GN=fubp1 PE=2 SV=1	1	21	40.8	3.9125e-181	584910000	635150000	702670000	NA	NA	NA	861810000	639020000	739900000	NA	NA	NA
Q6P5M3;A3KQ06	Q6P5M3;A3KQ06	rps9	>tr|Q6P5M3|Q6P5M3_DANRE Ribosomal protein S9 OS=Danio rerio GN=rps9 PE=2 SV=1;>tr|A3KQ06|A3KQ06_DANRE Ribosomal protein S9 (Fragment) OS=Danio rerio GN=rps9 PE=3 SV=1	2	5	22.7	5.0625e-09	29727000	23319000	36690000	NA	NA	NA	NA	NA	NA	NA	NA	NA
Q6PBK3	Q6PBK3	rps28	>sp|Q6PBK3|RS28_DANRE 40S ribosomal protein S28 OS=Danio rerio GN=rps28 PE=3 SV=1	1	3	46.4	7.4007e-14	20366000	11899000	NA	NA	NA	NA	40753000	47663000	156790000	NA	NA	NA
Q6PBW3	Q6PBW3	rps14	>tr|Q6PBW3|Q6PBW3_DANRE Ribosomal protein S14 OS=Danio rerio GN=rps14 PE=2 SV=1	1	8	40.4	2.5729e-31	127460000	86285000	231150000	11578000	NA	NA	435280000	289320000	703080000	NA	NA	NA
Q6PBY1	Q6PBY1	rps3a	>sp|Q6PBY1|RS3A_DANRE 40S ribosomal protein S3a OS=Danio rerio GN=rps3a PE=2 SV=3	1	9	39.7	2.5294e-24	149110000	97943000	344960000	NA	17833000	NA	295380000	91644000	140330000	NA	NA	NA
Q6PBY3	Q6PBY3	edf1	>sp|Q6PBY3|EDF1_DANRE Endothelial differentiation-related factor 1 homolog OS=Danio rerio GN=edf1 PE=2 SV=1	1	8	47.3	2.5338e-22	111720000	88649000	190540000	NA	NA	NA	147230000	85362000	236240000	NA	NA	NA
Q6PBZ1	Q6PBZ1	rpl7a	>tr|Q6PBZ1|Q6PBZ1_DANRE Ribosomal protein L7a OS=Danio rerio GN=rpl7a PE=2 SV=1	1	9	30.5	5.6828e-45	40612000	67234000	47938000	NA	NA	17850000	301410000	137920000	102430000	NA	NA	NA
Q6PCR7	Q6PCR7	eif3a	>sp|Q6PCR7|EIF3A_DANRE Eukaryotic translation initiation factor 3 subunit A OS=Danio rerio GN=eif3a PE=2 SV=1	1	22	19.7	1.7852e-121	94726000	37023000	86196000	NA	NA	NA	189600000	90939000	365740000	NA	68393000	NA
Q6TGY6;B8K0D5;B8K0D6	Q6TGY6;B8K0D5	pabpc1l	>tr|Q6TGY6|Q6TGY6_DANRE Poly(A) binding protein, cytoplasmic 1-like OS=Danio rerio GN=pabpc1l PE=2 SV=1;>tr|B8K0D5|B8K0D5_DANRE Novel protein similar to H.sapiens PABPC1, poly(A) binding protein, cytoplasmic 1 (PABPC1, zgc:55855) (Fragment) OS=Danio rerio	3	36	69.2	0	4021700000	2798100000	1326300000	616140	4018900	5427300	5591200000	3857400000	3747000000	NA	6036900	NA
Q6TLG8	Q6TLG8	rps3	>tr|Q6TLG8|Q6TLG8_DANRE Ribosomal protein S3 OS=Danio rerio GN=rps3 PE=2 SV=1	1	21	80.8	9.7288e-119	902580000	244630000	577170000	NA	29107000	107460000	589530000	509170000	2109000000	NA	NA	NA
Q7SXA1	Q7SXA1	rpl26	>tr|Q7SXA1|Q7SXA1_DANRE Ribosomal protein L26 OS=Danio rerio GN=rpl26 PE=2 SV=1	1	2	11.7	0.00010636	25137000	47430000	NA	NA	24321000	NA	NA	NA	NA	NA	NA	NA
Q7SXN2;F1QC42	Q7SXN2	hnrpdl	>tr|Q7SXN2|Q7SXN2_DANRE Heterogeneous nuclear ribonucleoprotein D-like OS=Danio rerio GN=hnrpdl PE=2 SV=1	2	12	42.6	7.0497e-136	548080000	522040000	301000000	NA	NA	15656000	429630000	926340000	1367700000	NA	NA	NA
Q7SXP4;E9QGF8;Q6NYA0;F1QXQ1;F1RBL9;F1RCS7;E9QIC5	Q7SXP4;E9QGF8;Q6NYA0;F1QXQ1;F1RBL9;F1RCS7	srsf1a;srsf1b	>sp|Q7SXP4|SRS1A_DANRE Serine/arginine-rich splicing factor 1A OS=Danio rerio GN=srsf1a PE=2 SV=2;>tr|E9QGF8|E9QGF8_DANRE Serine/arginine-rich-splicing factor 1a OS=Danio rerio GN=srsf1a PE=4 SV=1;>sp|Q6NYA0|SRS1B_DANRE Serine/arginine-rich splicing factor	7	15	53.3	2.7809e-49	187890000	179410000	235020000	NA	NA	NA	325080000	357980000	405880000	NA	NA	NA
Q7SZC9	Q7SZC9	hnrnpr	>tr|Q7SZC9|Q7SZC9_DANRE Heterogeneous nuclear ribonucleoprotein R OS=Danio rerio GN=hnrpr PE=2 SV=1	1	14	77.6	0	1262600000	1019900000	712630000	16470000	23130000	13027000	899940000	1409100000	1473400000	NA	493810000	NA
Q7ZTI0	Q7ZTI0	ssb	>tr|Q7ZTI0|Q7ZTI0_DANRE Sjogren syndrome antigen B (Autoantigen La) OS=Danio rerio GN=ssb PE=2 SV=1	1	18	45.4	0	645500000	783440000	445650000	NA	NA	23969000	1075200000	730330000	985350000	NA	57615000	NA
Q7ZTS8	Q7ZTS8	elavl1	>tr|Q7ZTS8|Q7ZTS8_DANRE ELAV (embryonic lethal, abnormal vision, Drosophila)-like 1 (Hu antigen R) OS=Danio rerio GN=elavl1 PE=2 SV=1	1	20	64.5	0	17840000000	16480000000	15014000000	2358200	3123700	4941100	20806000000	22828000000	23424000000	NA	219390000	NA
Q7ZU48	Q7ZU48	hnrnpa0l	>tr|Q7ZU48|Q7ZU48_DANRE Heterogeneous nuclear ribonucleoprotein A0, like OS=Danio rerio GN=hnrnpa0l PE=2 SV=2	1	14	49	0	3808900000	2472900000	2418700000	40844000	50446000	21148000	3530800000	5892300000	4849000000	NA	1130300000	629550000
Q7ZV05;A9C3W5	Q7ZV05;A9C3W5	rps11;si:dkey-159f12.2	>tr|Q7ZV05|Q7ZV05_DANRE Ribosomal protein S11 OS=Danio rerio GN=rps11 PE=2 SV=1;>tr|A9C3W5|A9C3W5_DANRE Novel protein similar to ribosomal protein S11 (Rps11) (Fragment) OS=Danio rerio GN=si:dkey-159f12.2 PE=4 SV=1	2	10	48.4	3.1876e-22	148950000	116490000	144230000	NA	NA	NA	364320000	287160000	363900000	NA	NA	NA
Q7ZVK5;E9QJ25	Q7ZVK5	pcbp2	>tr|Q7ZVK5|Q7ZVK5_DANRE Pcbp2 protein OS=Danio rerio GN=pcbp2 PE=2 SV=1	2	7	29.9	5.6232e-59	62623000	51883000	45262000	NA	NA	NA	142070000	111570000	139350000	NA	NA	NA
Q7ZVM6;E9QEY1	Q7ZVM6	tia1l	>tr|Q7ZVM6|Q7ZVM6_DANRE Cytotoxic granule-associated RNA binding protein 1, like OS=Danio rerio GN=tia1l PE=2 SV=1	2	11	39.2	8.1682e-298	1439400000	710210000	533760000	50282000	78536000	48389000	939470000	521270000	537600000	NA	NA	NA
Q7ZVY0	Q7ZVY0	tia1	>tr|Q7ZVY0|Q7ZVY0_DANRE Cytotoxic granule-associated RNA binding protein 1 OS=Danio rerio GN=tia1 PE=2 SV=1	1	13	44	0	6083000000	4939700000	3818300000	121350000	462610000	36718000	2576700000	3296300000	4051200000	NA	529630000	NA
Q7ZW09;F1QMR5	Q7ZW09	hnrpl	>tr|Q7ZW09|Q7ZW09_DANRE Heterogeneous nuclear ribonucleoprotein L OS=Danio rerio GN=hnrpl PE=2 SV=1	2	15	35.3	2.0369e-150	170410000	124290000	143010000	NA	NA	NA	674570000	325770000	687170000	NA	NA	NA
Q7ZW95	Q7ZW95	rpl4	>tr|Q7ZW95|Q7ZW95_DANRE Ribosomal protein L4 OS=Danio rerio GN=rpl4 PE=2 SV=1	1	14	40	5.6491e-56	234540000	276870000	262310000	NA	NA	NA	756740000	535240000	370280000	NA	NA	NA
Q7ZWA3;E9QBG3;Q7ZWA3-2;F8W5K3	Q7ZWA3;E9QBG3;Q7ZWA3-2;F8W5K3	rbmx	>sp|Q7ZWA3|RBMX_DANRE RNA-binding motif protein, X chromosome OS=Danio rerio GN=rbmx PE=2 SV=1;>tr|E9QBG3|E9QBG3_DANRE RNA-binding motif protein, X-linked OS=Danio rerio GN=rbmx PE=4 SV=1;>sp|Q7ZWA3-2|RBMX_DANRE Isoform 2 of RNA-binding motif protein, X ch	4	10	29.6	5.7395e-40	174080000	168830000	196480000	NA	NA	NA	257800000	157010000	254660000	NA	NA	NA
Q7ZWJ4;F8W484	Q7ZWJ4	rpl18a	>sp|Q7ZWJ4|RL18A_DANRE 60S ribosomal protein L18a OS=Danio rerio GN=rpl18a PE=2 SV=1	2	6	34.7	1.9736e-54	118700000	189970000	219060000	NA	NA	NA	486120000	283200000	302920000	NA	NA	NA
Q7ZWJ7	Q7ZWJ7	rpl34	>sp|Q7ZWJ7|RL34_DANRE 60S ribosomal protein L34 OS=Danio rerio GN=rpl34 PE=2 SV=3	1	5	37.6	1.8609e-11	105790000	120800000	237680000	NA	NA	NA	309830000	204940000	169580000	NA	NA	NA
Q800H6;F1QTW8	Q800H6	matr3l1.1	>tr|Q800H6|Q800H6_DANRE Matrin 3-like 1.2 OS=Danio rerio GN=matr3l1.1 PE=2 SV=2	2	17	18.1	1.1133e-105	54956000	49709000	134940000	NA	NA	NA	166170000	157670000	252930000	NA	NA	NA
Q802C7	Q802C7	tardbp	>tr|Q802C7|Q802C7_DANRE TAR DNA binding protein OS=Danio rerio GN=tardbp PE=2 SV=1	1	18	51.5	0	2706600000	3041300000	1553600000	NA	NA	NA	2483300000	1752500000	2448100000	NA	NA	NA
Q802C9;A5WVT8;Q7ZU67;F1R166	Q802C9;A5WVT8;Q7ZU67;F1R166	eif4a1a;eif4a1b;eif4a2	>tr|Q802C9|Q802C9_DANRE Eukaryotic translation initiation factor 4A, isoform 1A OS=Danio rerio GN=eif4a1a PE=2 SV=1;>tr|A5WVT8|A5WVT8_DANRE Novel protein similar to vertebrate eukaryotic translation initiation factor 4A, isoform 2 (EIF4A2, zgc:63783) (Frag	4	6	17.5	1.017e-31	54986000	35000000	90804000	NA	NA	NA	34525000	58179000	70836000	NA	NA	NA
Q803N5;Q6NYX2;E9QET0	Q803N5;Q6NYX2	tardbpl	>tr|Q803N5|Q803N5_DANRE TAR DNA binding protein, like OS=Danio rerio GN=tardbpl PE=2 SV=1;>tr|Q6NYX2|Q6NYX2_DANRE TAR DNA binding protein, like OS=Danio rerio GN=tardbpl PE=2 SV=1	3	18	71	0	1574500000	2630100000	2534500000	NA	298040000	240930000	2430300000	2548100000	3012300000	NA	159620000	NA
Q8JGS9;E9QJF2;E9QHH6	Q8JGS9;E9QJF2	rps18	>sp|Q8JGS9|RS18_DANRE 40S ribosomal protein S18 OS=Danio rerio GN=rps18 PE=2 SV=1;>tr|E9QJF2|E9QJF2_DANRE Ribosomal protein S18 OS=Danio rerio GN=rps18 PE=3 SV=1	3	7	42.8	2.749e-27	177110000	164780000	350530000	NA	NA	NA	256910000	157550000	536070000	NA	NA	NA
Q8UVX0;Q8UVX0-2;F1QZQ2;E9QHH1	Q8UVX0	piwil1	>sp|Q8UVX0|PIWL1_DANRE Piwi-like protein 1 OS=Danio rerio GN=piwil1 PE=1 SV=1	4	11	14	2.9409e-43	60390000	35383000	NA	NA	NA	NA	141490000	92153000	226020000	NA	NA	NA
Q9PTK4	Q9PTK4	hug	>tr|Q9PTK4|Q9PTK4_DANRE HuG OS=Danio rerio GN=hug PE=2 SV=1	1	17	66.1	0	2679100000	1670000000	2096200000	NA	NA	NA	1839200000	1886600000	2402500000	NA	NA	NA
Q9PU62;F1QFA4;F1QQ23;Q6P3H0;E7F3S4;F1RCP3;F1QH59	Q9PU62;F1QFA4	cth1	>tr|Q9PU62|Q9PU62_DANRE Cth1 OS=Danio rerio GN=cth1 PE=2 SV=1;>tr|F1QFA4|F1QFA4_DANRE Cth1 (Fragment) OS=Danio rerio GN=cth1 PE=4 SV=1	7	8	21.6	1.8231e-63	203730000	153240000	89971000	NA	NA	NA	851190000	217660000	384720000	NA	NA	NA
Q9PW28	Q9PW28	eif4e1b	>sp|Q9PW28|IF4EB_DANRE Eukaryotic translation initiation factor 4E-1B OS=Danio rerio GN=eif4e1b PE=2 SV=1	1	3	14.5	3.8589e-07	65790000	44985000	NA	NA	NA	NA	NA	NA	NA	NA	NA	NA
Q9PW80;E9QJD2	Q9PW80	igf2bp3	>sp|Q9PW80|IF2B3_DANRE Insulin-like growth factor 2 mRNA-binding protein 3 OS=Danio rerio GN=igf2bp3 PE=1 SV=1	2	33	56.4	0	11913000000	10320000000	10264000000	93592000	373470000	321200000	19015000000	19452000000	22138000000	NA	1326300000	451650000

## Sheet: ST2B_ZGA UV+ enriched
Supplemental Table S2B. List of ZGA UV + enriched protein groups with raw values from triplicate samples, FDR=0.01
# Label-free quantification (LFQ) protein intensities for each replicate sample of UV irradiiated (UV+) and non-irradiated (UV–) samples for preZGA and ZGA developmental stages are shown for each protein group. Number of identified peptides and amino acid sequence coverage for each of the identified protein group are indicated. The number of identified proteins and their respective names are also…
								preZGA						ZGA
								UV +			UV –			UV +			UV –
Protein.IDs	Majority.protein.IDs	Gene.names	Fasta.headers	Number.of.proteins	Peptides	Sequence.coverage [%]	PEP	LFQ.intensity.rep1	LFQ.intensity.rep2	LFQ.intensity.rep3	LFQ.intensity.rep1	LFQ.intensity.rep2	LFQ.intensity.rep3	LFQ.intensity.rep1	LFQ.intensity.rep2	LFQ.intensity.rep3	LFQ.intensity.rep1	LFQ.intensity.rep2	LFQ.intensity.rep3
A1A5X7;F1R0M4	A1A5X7	zgc:158363	>tr|A1A5X7|A1A5X7_DANRE Zgc:158363 OS=Danio rerio GN=zgc:158363 PE=2 SV=1	2	7	18.7	3.93e-42	118390000	116910000	268310000	NA	NA	NA	268330000	306650000	365200000	NA	NA	NA
A1A605;F1RB19	A1A605;F1RB19	ybx1	>tr|A1A605|A1A605_DANRE Y box binding protein 1 OS=Danio rerio GN=ybx1 PE=2 SV=1;>tr|F1RB19|F1RB19_DANRE Y box-binding protein 1 OS=Danio rerio GN=ybx1 PE=4 SV=1	2	20	64.7	0	10300000000	11600000000	8170700000	39187000	70719000	NA	13100000000	10500000000	10100000000	NA	493290000	NA
A2BFY7;E7F7D8;Q6JIZ2	A2BFY7	purba	>tr|A2BFY7|A2BFY7_DANRE Novel protein similar to vertebrate purine-rich element binding protein B (PURB) OS=Danio rerio GN=si:dkey-202n14.1 PE=2 SV=1	3	10	36.9	1.13e-124	NA	NA	348460000	NA	NA	NA	429800000	529470000	278200000	NA	NA	NA
A2BHA7;A2BHA8;A2BHA9;A2BHB0;A2BHB2;Q6P0K2;A2BHA6	A2BHA7;A2BHA8;A2BHA9;A2BHB0;A2BHB2;Q6P0K2;A2BHA6	srsf7a	>tr|A2BHA7|A2BHA7_DANRE Novel protein (Zgc:77155) (Fragment) OS=Danio rerio GN=DKEY-85K8.3 PE=4 SV=1;>tr|A2BHA8|A2BHA8_DANRE Novel protein (Zgc:77155) (Fragment) OS=Danio rerio GN=DKEY-85K8.3 PE=4 SV=1;>tr|A2BHA9|A2BHA9_DANRE Novel protein (Zgc:77155) (Fra	7	6	30.7	1.66e-20	202060000	168980000	230790000	NA	NA	NA	296090000	278610000	298860000	NA	NA	NA
A2CE73;Q6NW56	A2CE73;Q6NW56	khdrbs1a	>tr|A2CE73|A2CE73_DANRE KH domain containing, RNA binding, signal transduction associated 1 OS=Danio rerio GN=khdrbs1a PE=4 SV=1;>tr|Q6NW56|Q6NW56_DANRE KH domain containing, RNA binding, signal transduction associated 1 OS=Danio rerio GN=khdrbs1a PE=2 SV=	2	11	23.3	3.02e-51	816790000	630490000	631770000	NA	NA	NA	1355900000	1253900000	932170000	NA	532630000	NA
A2CF31	A2CF31	atxn2	>tr|A2CF31|A2CF31_DANRE Novel protein similar to vertebrate ataxin 2 (ATXN2) OS=Danio rerio GN=si:dkey-165i4.1 PE=4 SV=2	1	5	7	2.22e-35	NA	NA	NA	NA	NA	NA	29947000	25615000	27179000	NA	NA	NA
A2RUY5	A2RUY5	zgc:158399	>tr|A2RUY5|A2RUY5_DANRE Novel protein similar to vertebrate ubiquitin associated protein 2-like (UBAP2L, zgc:158399) OS=Danio rerio GN=CH211-220M6.1 PE=2 SV=1	1	4	5.1	1.11e-16	NA	NA	NA	NA	NA	NA	28028000	20140000	32326000	NA	NA	NA
A5WVQ1;A5WVQ2;A5WVQ3	A5WVQ1	caprin1b	>tr|A5WVQ1|A5WVQ1_DANRE Cell cycle associated protein 1b OS=Danio rerio GN=caprin1b PE=4 SV=1	3	6	8.8	5.47e-34	67626000	49922000	117920000	NA	NA	NA	50455000	37909000	109960000	NA	NA	NA
A5WWG5;A5WWG4	A5WWG5;A5WWG4	srsf3b	>tr|A5WWG5|A5WWG5_DANRE Serine/arginine-rich splicing factor 3b OS=Danio rerio GN=srsf3b PE=4 SV=1;>tr|A5WWG4|A5WWG4_DANRE Serine/arginine-rich splicing factor 3b OS=Danio rerio GN=srsf3b PE=4 SV=1	2	5	41.9	2.32e-37	109210000	127630000	67453000	NA	NA	NA	177670000	112100000	178420000	NA	NA	NA
F8W5X1;E9QGV8;A7YYD9;E7FGA2;Q6NUT4	F8W5X1;E9QGV8;A7YYD9;E7FGA2;Q6NUT4	pabpn1	>tr|F8W5X1|F8W5X1_DANRE Poly(A)-binding protein, nuclear 1 OS=Danio rerio GN=pabpn1 PE=4 SV=1;>tr|E9QGV8|E9QGV8_DANRE Poly(A)-binding protein, nuclear 1 OS=Danio rerio GN=pabpn1 PE=4 SV=1;>tr|A7YYD9|A7YYD9_DANRE Pabpn1 protein OS=Danio rerio GN=pabpn1 PE=2	5	4	22	2.03e-23	NA	NA	NA	NA	NA	NA	147220000	244180000	231370000	NA	NA	NA
A8DZG2;F1QNA5;E7FFF7;Q5SPH2;Q5SPH1;Q4V988;Q5SPF9;Q6DHJ0	A8DZG2;F1QNA5;E7FFF7	srsf6b;srsf6a	>tr|A8DZG2|A8DZG2_DANRE Serine/arginine-rich splicing factor 6b OS=Danio rerio GN=sfrs6 PE=4 SV=1;>tr|F1QNA5|F1QNA5_DANRE Serine/arginine-rich-splicing factor 6a OS=Danio rerio GN=srsf6a PE=4 SV=1;>tr|E7FFF7|E7FFF7_DANRE Serine/arginine-rich-splicing facto	8	4	11.8	7.61e-14	NA	NA	NA	NA	NA	NA	231730000	121960000	160750000	NA	NA	NA
A8E526	A8E526	rpl14	>tr|A8E526|A8E526_DANRE Ribosomal protein L14 OS=Danio rerio GN=rpl14 PE=2 SV=1	1	3	23.7	4.26e-12	50224000	59460000	37183000	NA	NA	NA	91208000	81253000	84649000	NA	NA	NA
A8KB68;F1QA36	A8KB68;F1QA36	si:ch211-226h8.13;si:ch211-154a22.8	>tr|A8KB68|A8KB68_DANRE Si:ch211-226h8.13 OS=Danio rerio GN=si:ch211-226h8.13 PE=2 SV=1;>tr|F1QA36|F1QA36_DANRE Si:ch211-226h8.13 (Fragment) OS=Danio rerio GN=zgc:171717 PE=4 SV=1	2	2	14.9	2.49e-08	NA	NA	NA	NA	NA	NA	NA	81616000	68732000	NA	NA	NA
F1Q577;A8KC22;F1RC33	F1Q577;A8KC22;F1RC33	hnrnpl2	>tr|F1Q577|F1Q577_DANRE Heterogeneous nuclear ribonucleoprotein L2 OS=Danio rerio GN=hnrnpl2 PE=4 SV=1;>tr|A8KC22|A8KC22_DANRE Heterogeneous nuclear ribonucleoprotein L2 OS=Danio rerio GN=hnrnpl2 PE=2 SV=1;>tr|F1RC33|F1RC33_DANRE Heterogeneous nuclear ribo	3	16	45.1	2.57e-207	1018500000	907910000	846640000	2572700	2470100	6775400	364610000	391480000	520390000	NA	NA	NA
A9C3V8	A9C3V8	igf2bp2a	>tr|A9C3V8|A9C3V8_DANRE Insulin-like growth factor 2 mRNA binding protein 2a OS=Danio rerio GN=igf2bp2a PE=4 SV=1	1	2	4.6	2.2e-06	NA	NA	NA	NA	NA	NA	NA	9641400	13554000	NA	NA	NA
A9C4A6;A9C4A8;A9C4A7	A9C4A6	mkrn4	>tr|A9C4A6|A9C4A6_DANRE Makorin, ring finger protein, 4 OS=Danio rerio GN=si:ch73-237c6.4 PE=4 SV=1	3	9	25.4	2.85e-56	NA	NA	NA	NA	NA	NA	157840000	103260000	171430000	NA	NA	NA
B0R085;B0R086	B0R085;B0R086	zgc:103482	>tr|B0R085|B0R085_DANRE Novel protein similar to H.sapiens SERBP1, SERPINE1 mRNA binding protein 1 (SERBP1, zgc:103482) OS=Danio rerio GN=DKEY-30K6.2 PE=4 SV=1;>tr|B0R086|B0R086_DANRE Novel protein similar to H.sapiens SERBP1, SERPINE1 mRNA binding protein	2	5	26.5	3.62e-88	57936000	46297000	NA	NA	NA	NA	42222000	60418000	106850000	NA	NA	NA
B0S522;F1QI07	B0S522;F1QI07	rbm45	>tr|B0S522|B0S522_DANRE Novel protein similar to H.sapiens DRBP1, developmentally regulated RNA binding protein 1 (DRBP1) OS=Danio rerio GN=rbm45 PE=4 SV=1;>tr|F1QI07|F1QI07_DANRE RNA-binding motif protein 45 (Fragment) OS=Danio rerio GN=rbm45 PE=4 SV=1	2	5	14.1	3.61e-18	NA	NA	NA	NA	NA	NA	96024000	34793000	64338000	NA	NA	NA
B0S618	B0S618	fastk	>tr|B0S618|B0S618_DANRE Novel protein similar to vertebrate Fas-activated serine/threonine kinase (FASTK) OS=Danio rerio GN=si:dkeyp-73d8.3 PE=4 SV=1	1	7	9.1	9.21e-21	NA	NA	NA	NA	NA	NA	89193000	83924000	72466000	NA	NA	NA
B0S6P6;B0S6P7	B0S6P6	ddx3	>tr|B0S6P6|B0S6P6_DANRE DEAD (Asp-Glu-Ala-Asp) box polypeptide 3 OS=Danio rerio GN=ddx3 PE=3 SV=1	2	40	58	0	452770000	319250000	363900000	NA	NA	NA	435090000	554860000	392450000	NA	NA	NA
B0S6Z1	B0S6Z1	dhx9	>tr|B0S6Z1|B0S6Z1_DANRE DEAH (Asp-Glu-Ala-His) box polypeptide 9 OS=Danio rerio GN=si:ch211-194i4.1 PE=4 SV=1	1	16	15	2.16e-76	79674000	19068000	NA	NA	NA	NA	55877000	93043000	151830000	NA	NA	NA
F1QQ31;B0UYI3	F1QQ31;B0UYI3	mrpl37	>tr|F1QQ31|F1QQ31_DANRE Mitochondrial ribosomal protein L37 OS=Danio rerio GN=mrpl37 PE=4 SV=1;>tr|B0UYI3|B0UYI3_DANRE Mitochondrial ribosomal protein L37 OS=Danio rerio GN=mrpl37 PE=4 SV=1	2	15	34.8	1.28e-128	352660000	758920000	254060000	NA	NA	NA	965290000	534610000	611440000	NA	NA	NA
B0V3S8;F1QRQ0;E7EZM9;B0V3S9	B0V3S8;F1QRQ0;E7EZM9;B0V3S9	myef2	>tr|B0V3S8|B0V3S8_DANRE Myelin expression factor 2 OS=Danio rerio GN=myef2 PE=4 SV=1;>tr|F1QRQ0|F1QRQ0_DANRE Myelin expression factor 2 OS=Danio rerio GN=myef2 PE=4 SV=1;>tr|E7EZM9|E7EZM9_DANRE Myelin expression factor 2 OS=Danio rerio GN=OTTDARG0000002677	4	19	42	1.51e-301	766210000	946970000	530250000	NA	NA	NA	1222300000	835210000	1192400000	NA	NA	NA
Q5BJA5;Q05AK8;F1R4A4;B3DJF8;Q6PC60;F1RD54;F1R0S5;F1QKN7;F1QGY1;F1QF78;F1QAU0;G1K2T9;G1K2L0;F1RAY6;F1RAV8;F1QIH4;F1QG64;F1QAY4;F1QA71;F1Q9D0;E7FEC9;E7F459;E7F2U8;E7EXF4;G1K2M4;F1QGS7;G1K2V1;E9QHX5;E7EZA5;Q6DH91;F1QMJ9	Q5BJA5;Q05AK8;F1R4A4;B3DJF8;Q6PC60;F1RD54;F1R0S5;F1QKN7;F1QGY1;F1QF78;F1QAU0;G1K2T9;G1K2L0;F1RAY6;F1RAV8;F1QIH4;F1QG64;F1QAY4;F1QA71;F1Q9D0;E7FEC9;E7F459;E7F2U8;E7EXF4;G1K2M4;F1QGS7;G1K2V1;E9QHX5;E7EZA5	zgc:112234;zgc:171759;LOC570661;hist2h2l;wu:fe11b02;CABZ01086354.1;CR762436.3;zgc:173585;LOC100333437;CU302436.6	>sp|Q5BJA5|H2B1_DANRE Histone H2B 1/2 OS=Danio rerio GN=zgc:112234 PE=2 SV=3;>tr|Q05AK8|Q05AK8_DANRE Histone H2B OS=Danio rerio GN=wu:fe11b02 PE=2 SV=1;>tr|F1R4A4|F1R4A4_DANRE Histone H2B OS=Danio rerio GN=zgc:171759 PE=3 SV=1;>tr|B3DJF8|B3DJF8_DANRE Histo	31	4	38.7	1.33e-65	97094000	102000000	385720000	469920000	398330000	256250000	NA	46721000	77921000	NA	NA	NA
Q642J7;B7ZD34;B7ZD32	Q642J7;B7ZD34;B7ZD32	rps24	>tr|Q642J7|Q642J7_DANRE 40S ribosomal protein S24 OS=Danio rerio GN=rps24 PE=2 SV=1;>tr|B7ZD34|B7ZD34_DANRE 40S ribosomal protein S24 OS=Danio rerio GN=rps24 PE=3 SV=1;>tr|B7ZD32|B7ZD32_DANRE 40S ribosomal protein S24 OS=Danio rerio GN=rps24 PE=3 SV=1	3	4	35.1	5.9e-22	250060000	NA	135290000	NA	NA	NA	128950000	55284000	190080000	NA	NA	NA
B7ZVC7;F1Q758;E9QB16	B7ZVC7;F1Q758;E9QB16	rbm38	>tr|B7ZVC7|B7ZVC7_DANRE RNA binding motif protein 38 OS=Danio rerio GN=rbm38 PE=2 SV=1;>tr|F1Q758|F1Q758_DANRE RNA-binding motif protein 38 OS=Danio rerio GN=rbm38 PE=4 SV=1;>tr|E9QB16|E9QB16_DANRE RNA-binding motif protein 38 OS=Danio rerio GN=rbm38 PE=4	3	7	23.1	4.98e-40	225350000	287590000	289660000	NA	NA	NA	246610000	192300000	226100000	NA	NA	NA
B8A5I7	B8A5I7	ssbp1	>tr|B8A5I7|B8A5I7_DANRE Novel protein similar to vertebrate single-stranded DNA binding protein 1 (SSBP1, zgc:110325) OS=Danio rerio GN=CH211-258F14.1 PE=4 SV=1	1	10	54.8	1.48e-298	1222100000	1641800000	2989700000	890220000	1287900000	3080000000	104760000	352470000	307520000	NA	24097000	NA
B8JL34;F1QMD2;F1QSU8	B8JL34;F1QMD2;F1QSU8	zgc:123010	>tr|B8JL34|B8JL34_DANRE Novel protein with a RNA recognition motif. (A.k.a. RRM, RBD, or RNP domain) (Zgc:123010) OS=Danio rerio GN=CH73-123I13.3 PE=4 SV=1;>tr|F1QMD2|F1QMD2_DANRE Zgc:123010 OS=Danio rerio GN=zgc:123010 PE=4 SV=1;>tr|F1QSU8|F1QSU8_DANRE Zg	3	4	10.3	5.6e-10	NA	NA	NA	NA	NA	NA	35008000	20462000	39907000	NA	NA	NA
B8JL46;F1R101	B8JL46;F1R101	zgc:158450	>tr|B8JL46|B8JL46_DANRE Novel protein (Zgc:158450) OS=Danio rerio GN=CH73-211A15.2 PE=4 SV=1;>tr|F1R101|F1R101_DANRE Zgc:158450 OS=Danio rerio GN=zgc:158450 PE=4 SV=1	2	15	9.8	5.59e-47	160020000	98238000	106140000	NA	19555000	NA	202990000	127580000	170850000	NA	NA	NA
E7EY75;B8JLQ3;F1R6L6;E9QB18	E7EY75;B8JLQ3;F1R6L6;E9QB18	ncl	>tr|E7EY75|E7EY75_DANRE Nucleolin OS=Danio rerio GN=OTTDARG00000029258 PE=4 SV=1;>tr|B8JLQ3|B8JLQ3_DANRE Novel protein similar to H.sapiens NCL, nucleolin (NCL, zgc:152810) OS=Danio rerio GN=ncl PE=4 SV=1;>tr|F1R6L6|F1R6L6_DANRE Nucleolin OS=Danio rerio GN	4	28	40.1	0	4029900000	3737200000	1906600000	NA	3444300	3346100	4287400000	3389800000	4463400000	NA	425350000	NA
F1QKQ4;B8JMA9;F1QJZ5	F1QKQ4;B8JMA9;F1QJZ5	wdr33	>tr|F1QKQ4|F1QKQ4_DANRE WD repeat domain 33 OS=Danio rerio GN=wdr33 PE=4 SV=1;>tr|B8JMA9|B8JMA9_DANRE WD repeat domain 33 (Fragment) OS=Danio rerio GN=wdr33 PE=4 SV=1;>tr|F1QJZ5|F1QJZ5_DANRE WD repeat domain 33 OS=Danio rerio GN=wdr33 PE=4 SV=1	3	4	9	7.31e-12	46590000	43191000	39844000	NA	NA	NA	54272000	33757000	27551000	NA	NA	NA
E7EYA6;F1Q664;F1Q663	E7EYA6;F1Q664;F1Q663	fmr1	>tr|E7EYA6|E7EYA6_DANRE Fragile X mental retardation 1 OS=Danio rerio GN=OTTDARG00000020929 PE=4 SV=1;>tr|F1Q664|F1Q664_DANRE Fragile X mental retardation 1 OS=Danio rerio GN=fmr1 PE=4 SV=1;>tr|F1Q663|F1Q663_DANRE Fragile X mental retardation 1 OS=Danio re	3	12	25.6	8.21e-38	95941000	91093000	71751000	NA	NA	NA	117930000	113280000	186570000	NA	NA	NA
E7EYA8	E7EYA8	CABZ01073334.1	>tr|E7EYA8|E7EYA8_DANRE Uncharacterized protein OS=Danio rerio GN=CABZ01073334.1 PE=4 SV=1	1	12	74.1	0	1195300000	1015600000	683340000	NA	NA	NA	1487600000	1198500000	1169400000	NA	325300000	NA
E7F1G8	E7F1G8	wu:fk48d07	>tr|E7F1G8|E7F1G8_DANRE Uncharacterized protein OS=Danio rerio GN=wu:fk48d07 PE=3 SV=1	1	19	42.4	1.07e-164	200510000	166050000	86382000	NA	NA	NA	339510000	394020000	379880000	NA	NA	NA
E7F1H9	E7F1H9	yth2	>tr|E7F1H9|E7F1H9_DANRE Uncharacterized protein OS=Danio rerio GN=yth2 PE=4 SV=1	1	5	8.8	1.06e-09	NA	NA	NA	NA	NA	NA	23817000	16366000	26143000	NA	NA	NA
E9QJ40;E7F1Z6	E9QJ40;E7F1Z6	fam120c	>tr|E9QJ40|E9QJ40_DANRE Family with sequence similarity 120C OS=Danio rerio GN=fam120c PE=4 SV=1;>tr|E7F1Z6|E7F1Z6_DANRE Family with sequence similarity 120C OS=Danio rerio GN=OTTDARG00000030550 PE=4 SV=1	2	4	4.7	4.3e-12	NA	NA	NA	NA	NA	NA	57399000	50817000	45152000	NA	NA	NA
E7F304;Q9IBD0;F1R2H3;E9QIE8;Q6P0B1-5;F1QCR6;Q6P0B1-4;Q6P0B1-3;Q6P0B1-2;Q4U0V5;F1QSG1;E7FEV4;Q6P0B1;E7F7K3	E7F304;Q9IBD0;F1R2H3;E9QIE8	celf1	>tr|E7F304|E7F304_DANRE Cugbp, Elav-like family member 1 OS=Danio rerio GN=OTTDARG00000020225 PE=4 SV=1;>sp|Q9IBD0|CELF1_DANRE CUGBP Elav-like family member 1 OS=Danio rerio GN=celf1 PE=1 SV=1;>tr|F1R2H3|F1R2H3_DANRE Cugbp, Elav-like family member 1 OS=Dan	14	17	34.8	0	3810000000	3126200000	3128900000	NA	NA	NA	3422800000	1872200000	3500500000	NA	347660000	NA
E7F3J2	E7F3J2	hnrnpua	>tr|E7F3J2|E7F3J2_DANRE Uncharacterized protein OS=Danio rerio GN=wu:fc51c09 PE=4 SV=1	1	14	20.1	4.76e-58	88559000	93808000	NA	NA	NA	NA	93901000	125920000	117060000	NA	NA	NA
E7F3K7	E7F3K7	tbrg4	>tr|E7F3K7|E7F3K7_DANRE Transforming growth factor beta regulator 4 OS=Danio rerio GN=OTTDARG00000033339 PE=4 SV=1	1	7	10.3	1.52e-26	92822000	87584000	63268000	NA	18897000	19902000	97674000	92540000	55864000	NA	NA	NA
F1RED5;E7FEK4;E7F3L3;E7FFZ3;E7FFL8;F1RCB4;F1R2I8;F1REP2;F1QS86;F1QF63;F1QIP9	F1RED5;E7FEK4;E7F3L3;E7FFZ3	si:dkey-46g23.3;si:dkey-46g23.2	>tr|F1RED5|F1RED5_DANRE Si:dkey-46g23.3 OS=Danio rerio GN=si:dkey-46g23.3 PE=4 SV=1;>tr|E7FEK4|E7FEK4_DANRE Si:dkey-46g23.3 OS=Danio rerio GN=si:dkey-46g23.3 PE=4 SV=1;>tr|E7F3L3|E7F3L3_DANRE Si:dkey-46g23.3 OS=Danio rerio GN=OTTDARG00000023221 PE=4 SV=1;>	11	3	2.2	1.19e-06	NA	NA	NA	NA	NA	NA	97196000	26682000	19200000	NA	NA	NA
E7F3N2	E7F3N2	zar1l	>tr|E7F3N2|E7F3N2_DANRE Im:7158796 OS=Danio rerio GN=im:7158796 PE=4 SV=1	1	8	30.4	1.44e-23	145980000	99150000	69005000	NA	NA	20564000	NA	53036000	57409000	NA	NA	NA
Q6PFQ2;F1QUG5;E7F475	Q6PFQ2;F1QUG5;E7F475	eif3c	>sp|Q6PFQ2|EIF3C_DANRE Eukaryotic translation initiation factor 3 subunit C OS=Danio rerio GN=eif3c PE=1 SV=1;>tr|F1QUG5|F1QUG5_DANRE Eukaryotic translation initiation factor 3, subunit C OS=Danio rerio GN=eif3c PE=4 SV=1;>tr|E7F475|E7F475_DANRE Eukaryotic	3	16	18.5	3.05e-104	236480000	192530000	302420000	NA	NA	NA	268490000	237510000	668480000	NA	NA	NA
E7F4T4	E7F4T4	zc3h7b	>tr|E7F4T4|E7F4T4_DANRE Zinc finger CCCH-type-containing 7B OS=Danio rerio GN=zc3h7b PE=4 SV=1	1	17	23.9	2.19e-196	400320000	362520000	121250000	NA	NA	NA	196060000	378930000	346040000	NA	17991000	NA
E7F5D8	E7F5D8		>tr|E7F5D8|E7F5D8_DANRE Uncharacterized protein OS=Danio rerio PE=4 SV=1	1	24	19.5	7.83e-291	79638000	69063000	97490000	14247000	26554000	103810000	583720000	457790000	303060000	NA	NA	NA
F1R9Y8;E7F9M4;F1QB10;E9QDS1;E7FCA5	F1R9Y8;E7F9M4;F1QB10	hdlbp	>tr|F1R9Y8|F1R9Y8_DANRE High density lipoprotein-binding protein (vigilin) OS=Danio rerio GN=hdlbp PE=4 SV=1;>tr|E7F9M4|E7F9M4_DANRE High density lipoprotein-binding protein (vigilin) OS=Danio rerio GN=hdlbp PE=4 SV=1;>tr|F1QB10|F1QB10_DANRE High density l	5	39	37.3	0	532630000	267770000	596790000	NA	NA	NA	295460000	249610000	714480000	NA	257000000	NA
E9QC91;E7F9N3	E9QC91;E7F9N3	prrc2a	>tr|E9QC91|E9QC91_DANRE Proline-rich coiled-coil 2A OS=Danio rerio GN=prrc2a PE=4 SV=1;>tr|E7F9N3|E7F9N3_DANRE Proline-rich coiled-coil 2A OS=Danio rerio GN=prrc2a PE=4 SV=1	2	12	9.3	1.04e-49	NA	NA	NA	NA	NA	NA	104530000	57032000	98923000	NA	NA	NA
E7FAA3;F1QZW2;F1Q561;F1QAP4	E7FAA3;F1QZW2;F1Q561	raver1	>tr|E7FAA3|E7FAA3_DANRE Ribonucleoprotein, PTB-binding 1 OS=Danio rerio GN=raver1 PE=4 SV=1;>tr|F1QZW2|F1QZW2_DANRE Ribonucleoprotein, PTB-binding 1 OS=Danio rerio GN=raver1 PE=4 SV=1;>tr|F1Q561|F1Q561_DANRE Ribonucleoprotein, PTB-binding 1 OS=Danio rerio	4	6	10.8	1.52e-23	NA	NA	91565000	NA	NA	NA	73866000	43060000	44384000	NA	NA	NA
E7FAQ8;E7FAB3	E7FAQ8;E7FAB3	zgc:66127	>tr|E7FAQ8|E7FAQ8_DANRE Zgc:66127 OS=Danio rerio GN=zgc:66127 PE=4 SV=1;>tr|E7FAB3|E7FAB3_DANRE Zgc:66127 OS=Danio rerio GN=zgc:66127 PE=4 SV=1	2	9	26.5	3.38e-52	442700000	413290000	150440000	NA	NA	NA	346230000	431140000	586230000	NA	113310000	NA
E7FAC4	E7FAC4	si:ch211-103b1.2	>tr|E7FAC4|E7FAC4_DANRE Uncharacterized protein OS=Danio rerio PE=4 SV=1	1	13	18.9	1.29e-147	255230000	410860000	94887000	NA	NA	30331000	171620000	249030000	194630000	NA	37709000	NA
E7FAP0	E7FAP0	ythdf3	>tr|E7FAP0|E7FAP0_DANRE Uncharacterized protein OS=Danio rerio GN=ythdf3 PE=4 SV=2	1	5	9.5	1.3e-12	NA	NA	NA	NA	NA	NA	43194000	27733000	41028000	NA	NA	NA
E7FAV9;Q1LXK4;Q1LXK5	E7FAV9	mov10a	>tr|E7FAV9|E7FAV9_DANRE Moloney leukemia virus 10, homolog, a OS=Danio rerio GN=mov10a PE=4 SV=1	3	15	18	9.23e-91	74349000	98812000	101820000	NA	NA	NA	227610000	111740000	109190000	NA	NA	NA
E7FBQ7	E7FBQ7	LOC100535593	>tr|E7FBQ7|E7FBQ7_DANRE Uncharacterized protein OS=Danio rerio PE=4 SV=1	1	9	10.1	4.79e-18	NA	NA	NA	NA	NA	NA	36376000	37563000	21738000	NA	NA	NA
E7FCQ0	E7FCQ0	cnbpb	>tr|E7FCQ0|E7FCQ0_DANRE CCHC-type zinc finger, nucleic acid-binding protein OS=Danio rerio GN=cnbp PE=4 SV=1	1	5	19.3	8.15e-109	NA	NA	NA	NA	NA	NA	65293000	40353000	72949000	NA	NA	NA
E7FD91	E7FD91	ddx6	>tr|E7FD91|E7FD91_DANRE DEAD (Asp-Glu-Ala-Asp) box polypeptide 6 OS=Danio rerio GN=ddx6 PE=3 SV=1	1	21	46.6	0	671930000	704570000	244780000	11544000	24704000	14421000	763160000	990790000	779440000	NA	14438000	NA
F1QIJ0;E7FDQ5	F1QIJ0;E7FDQ5	caprin1a	>tr|F1QIJ0|F1QIJ0_DANRE Cell cycle-associated protein 1a OS=Danio rerio GN=caprin1a PE=4 SV=1;>tr|E7FDQ5|E7FDQ5_DANRE Cell cycle-associated protein 1a OS=Danio rerio GN=caprin1a PE=4 SV=1	2	4	8.2	5.97e-79	NA	NA	34660000	NA	NA	NA	44501000	38262000	50639000	NA	NA	NA
E7FDR0	E7FDR0	eif4enif1	>tr|E7FDR0|E7FDR0_DANRE Eukaryotic translation initiation factor 4E nuclear import factor 1 OS=Danio rerio GN=eif4enif1 PE=4 SV=1	1	26	32.5	2.21e-300	692360000	254110000	184480000	NA	7390400	6067400	1016800000	273970000	1035300000	NA	NA	NA
E7FEW2	E7FEW2	LOC563801	>tr|E7FEW2|E7FEW2_DANRE Uncharacterized protein OS=Danio rerio PE=4 SV=1	1	13	25.8	5.16e-80	144690000	195070000	131280000	34571000	301320000	310700000	166220000	244260000	192090000	NA	NA	NA
E7FFD9	E7FFD9	LOC100536140	>tr|E7FFD9|E7FFD9_DANRE Uncharacterized protein OS=Danio rerio PE=4 SV=1	1	5	13.3	7.35e-16	NA	NA	NA	NA	NA	NA	74900000	44091000	40453000	NA	NA	NA
E7FFV0	E7FFV0	pum1	>tr|E7FFV0|E7FFV0_DANRE Pumilio homolog 1 (Drosophila) OS=Danio rerio GN=pum1 PE=4 SV=1	1	19	18.5	1.21e-214	408320000	345960000	427740000	NA	NA	NA	812280000	552530000	652070000	NA	NA	NA
Q9YGX5;E9QB15;A2CE68	Q9YGX5;E9QB15	cpeb1;cpeb1b	>sp|Q9YGX5|CPEB1_DANRE Cytoplasmic polyadenylation element-binding protein 1 OS=Danio rerio GN=cpeb1 PE=1 SV=1;>tr|E9QB15|E9QB15_DANRE Orb/CPEB-related RNA-binding protein OS=Danio rerio GN=zorba PE=4 SV=1	3	12	30.8	0	143680000	140010000	202180000	NA	NA	NA	68412000	85191000	104300000	NA	NA	NA
E9QF21;E9QEZ5	E9QF21;E9QEZ5	mrpl34	>tr|E9QF21|E9QF21_DANRE Ribosomal protein L34 OS=Danio rerio GN=si:dkey-77a20.7 PE=3 SV=1;>tr|E9QEZ5|E9QEZ5_DANRE Ribosomal protein L34 OS=Danio rerio GN=si:dkey-77a20.7 PE=3 SV=1	2	3	19.2	2.21e-07	NA	NA	NA	NA	NA	NA	77178000	58932000	50501000	NA	NA	NA
E9QF69;F1QN76;Q6DGL0	E9QF69;F1QN76;Q6DGL0	rpl18	>tr|E9QF69|E9QF69_DANRE 60S ribosomal protein L18 OS=Danio rerio PE=3 SV=1;>tr|F1QN76|F1QN76_DANRE 60S ribosomal protein L18 (Fragment) OS=Danio rerio PE=3 SV=1;>tr|Q6DGL0|Q6DGL0_DANRE 60S ribosomal protein L18 OS=Danio rerio GN=zgc:92872 PE=2 SV=1	3	5	36.6	1.39e-25	NA	NA	NA	NA	NA	NA	270050000	137810000	95043000	NA	NA	NA
E9QFH8;E7F3H9;F1R386;E9QCU5	E9QFH8;E7F3H9	csde1	>tr|E9QFH8|E9QFH8_DANRE Si:ch211-261n11.2 OS=Danio rerio GN=si:ch211-261n11.2 PE=4 SV=1;>tr|E7F3H9|E7F3H9_DANRE Si:ch211-261n11.2 OS=Danio rerio GN=OTTDARG00000026582 PE=4 SV=1	4	32	49	0	699730000	947460000	319130000	12051000	17250000	NA	818880000	529080000	1370000000	NA	68220000	NA
E9QG02;F1RC77	E9QG02;F1RC77	fxr2	>tr|E9QG02|E9QG02_DANRE Fragile X mental retardation, autosomal homolog 2 OS=Danio rerio GN=fxr2 PE=4 SV=1;>tr|F1RC77|F1RC77_DANRE Fragile X mental retardation, autosomal homolog 2 OS=Danio rerio GN=fxr2 PE=4 SV=1	2	9	19.2	1.93e-84	NA	NA	NA	NA	NA	NA	23022000	27171000	46384000	NA	NA	NA
E9QHD6;Q7ZV13;Q6NZT9	E9QHD6;Q7ZV13;Q6NZT9	srsf2a;srsf2b	>tr|E9QHD6|E9QHD6_DANRE Uncharacterized protein OS=Danio rerio PE=4 SV=1;>tr|Q7ZV13|Q7ZV13_DANRE Splicing factor, arginine/serine-rich 2 OS=Danio rerio GN=srsf2 PE=2 SV=1;>tr|Q6NZT9|Q6NZT9_DANRE Uncharacterized protein OS=Danio rerio GN=zgc:55876 PE=2 SV=1	3	6	32.8	5.31e-99	NA	NA	118960000	NA	NA	NA	193550000	132220000	203860000	NA	NA	NA
E9QIR9;Q7ZV96	E9QIR9;Q7ZV96	rpl10	>tr|E9QIR9|E9QIR9_DANRE Ribosomal protein L10 OS=Danio rerio GN=rpl10 PE=4 SV=1;>tr|Q7ZV96|Q7ZV96_DANRE QM protein OS=Danio rerio GN=rpl10 PE=2 SV=1	2	3	21.1	4.66e-07	NA	NA	NA	NA	NA	NA	52188000	31080000	20040000	NA	NA	NA
E9QIZ1;E7EXJ3	E9QIZ1;E7EXJ3	si:ch211-197h24.6	>tr|E9QIZ1|E9QIZ1_DANRE Si:ch211-197h24.6 OS=Danio rerio GN=si:ch211-197h24.6 PE=4 SV=1;>tr|E7EXJ3|E7EXJ3_DANRE Si:ch211-197h24.6 OS=Danio rerio GN=OTTDARG00000033334 PE=4 SV=1	2	11	26.3	5.68e-28	NA	NA	NA	NA	NA	NA	82752000	62438000	72994000	NA	NA	NA
E9QJJ0;Q7SXQ1	E9QJJ0;Q7SXQ1	tial1	>tr|E9QJJ0|E9QJJ0_DANRE TIA1 cytotoxic granule-associated RNA-binding protein-like 1 OS=Danio rerio GN=tial1 PE=4 SV=1;>tr|Q7SXQ1|Q7SXQ1_DANRE TIA1 cytotoxic granule-associated RNA binding protein-like 1 OS=Danio rerio GN=tial1 PE=2 SV=1	2	11	29.8	1.17e-280	267040000	277310000	NA	NA	NA	41555000	209090000	127740000	135940000	NA	NA	NA
Q6NWH7;F1RBJ8;F1Q5L6;B0JZJ1;E9QG17;F1QBS1	Q6NWH7;F1RBJ8;F1Q5L6;B0JZJ1	ddx5	>tr|Q6NWH7|Q6NWH7_DANRE DEAD (Asp-Glu-Ala-Asp) box polypeptide 5 OS=Danio rerio GN=ddx5 PE=2 SV=1;>tr|F1RBJ8|F1RBJ8_DANRE DEAD (Asp-Glu-Ala-Asp) box polypeptide 5 OS=Danio rerio GN=ddx5 PE=3 SV=1;>tr|F1Q5L6|F1Q5L6_DANRE DEAD (Asp-Glu-Ala-Asp) box polypepti	6	12	24.6	1.65e-40	49303000	48668000	47843000	NA	NA	NA	197780000	135120000	100270000	NA	NA	NA
F1Q5V2;F1QSY3	F1Q5V2;F1QSY3	api5	>tr|F1Q5V2|F1Q5V2_DANRE Apoptosis inhibitor 5 OS=Danio rerio GN=api5 PE=4 SV=1;>tr|F1QSY3|F1QSY3_DANRE Apoptosis inhibitor 5 OS=Danio rerio GN=api5 PE=4 SV=1	2	4	7.4	1.7e-09	NA	NA	NA	NA	NA	NA	72166000	77792000	42770000	NA	NA	NA
F1Q618;B8K0C7;F1QMN6	F1Q618	si:ch1073-335m2.2	>tr|F1Q618|F1Q618_DANRE Si:ch1073-335m2.2 OS=Danio rerio GN=si:ch1073-335m2.2 PE=4 SV=1	3	19	8.4	1.22e-93	NA	NA	NA	NA	NA	NA	89382000	94880000	172720000	NA	NA	NA
Q6NXA4;F1Q6Y7;F1QDH0;F1QU46;E9QBB9;F8W5B1;F1R548;A4QN46;F1QB35	Q6NXA4;F1Q6Y7	ilf3;ilf3b	>sp|Q6NXA4|ILF3_DANRE Interleukin enhancer-binding factor 3 homolog OS=Danio rerio GN=ilf3 PE=1 SV=2;>tr|F1Q6Y7|F1Q6Y7_DANRE Interleukin enhancer-binding factor 3b OS=Danio rerio GN=ilf3b PE=4 SV=1	9	24	32.8	1.5e-241	349080000	265530000	417170000	NA	NA	NA	864980000	577050000	667290000	NA	NA	NA
F1Q6Z5;E9QBN6	F1Q6Z5;E9QBN6	cnbpa	>tr|F1Q6Z5|F1Q6Z5_DANRE Zinc finger protein 9 OS=Danio rerio GN=zff9 PE=4 SV=1;>tr|E9QBN6|E9QBN6_DANRE Zinc finger protein 9 OS=Danio rerio GN=zff9 PE=4 SV=1	2	7	49.1	4.91e-150	320800000	406940000	453030000	NA	NA	NA	726940000	530380000	916410000	NA	NA	NA
F1Q7F1;A5PMI5	F1Q7F1;A5PMI5	papd7	>tr|F1Q7F1|F1Q7F1_DANRE PAP-associated domain-containing 7 OS=Danio rerio GN=papd7 PE=4 SV=1;>tr|A5PMI5|A5PMI5_DANRE Novel protein similar to vertebrate polymerase (DNA directed) sigma (POLS) (Fragment) OS=Danio rerio GN=papd7 PE=4 SV=1	2	11	16.1	4.28e-33	129030000	113630000	89661000	10736000	26844000	NA	123560000	76360000	76107000	NA	NA	NA
F1Q7F8	F1Q7F8	rbm4.2	>tr|F1Q7F8|F1Q7F8_DANRE RNA binding motif protein 4.2 OS=Danio rerio GN=rbm4.2 PE=4 SV=1	1	16	45.8	5.35e-163	221100000	302360000	343680000	NA	NA	NA	451200000	367590000	665920000	NA	NA	NA
F1R887;F1Q7L0;F1RBA0	F1R887;F1Q7L0;F1RBA0	vtg4	>tr|F1R887|F1R887_DANRE Vitellogenin 4 OS=Danio rerio GN=vtg4 PE=4 SV=1;>tr|F1Q7L0|F1Q7L0_DANRE Vitellogenin 4 (Fragment) OS=Danio rerio GN=vtg4 PE=4 SV=1;>tr|F1RBA0|F1RBA0_DANRE Vitellogenin 4 OS=Danio rerio GN=vtg4 PE=4 SV=1	3	66	52.1	0	57440000	385560000	128350000	12505000	40477000	NA	1575800000	355910000	252850000	NA	306170000	179640000
F1Q898;F1R1G0	F1Q898	lsm14b	>tr|F1Q898|F1Q898_DANRE LSM14B, SCD6 homolog B (S. cerevisiae) OS=Danio rerio GN=lsm14b PE=4 SV=1	2	22	62.9	0	2300000000	2352700000	1929600000	16816000	67403000	96433000	7181700000	4654200000	5180000000	NA	305070000	143040000
F1Q8A5	F1Q8A5	hnrnpd	>tr|F1Q8A5|F1Q8A5_DANRE Heterogeneous nuclear ribonucleoprotein D OS=Danio rerio GN=hnrnpd PE=4 SV=1	1	11	28	3.22e-92	1217800000	1188200000	839740000	NA	17733000	NA	883700000	905660000	1038800000	NA	NA	NA
F1R183;F1Q8G3;F1QZF7;A5PL92	F1R183;F1Q8G3	eif4bb	>tr|F1R183|F1R183_DANRE Eukaryotic translation initiation factor 4Bb OS=Danio rerio GN=eif4bb PE=4 SV=1;>tr|F1Q8G3|F1Q8G3_DANRE Eukaryotic translation initiation factor 4Bb OS=Danio rerio GN=eif4bb PE=4 SV=1	4	18	30.1	1.38e-164	150170000	97138000	362060000	NA	NA	NA	168290000	148200000	465660000	NA	NA	NA
F1Q931	F1Q931	larp1b	>tr|F1Q931|F1Q931_DANRE Wu:fc76b04 OS=Danio rerio GN=wu:fc76b04 PE=4 SV=1	1	8	9.2	9.2e-45	34269000	31231000	36586000	NA	NA	NA	56345000	49214000	36256000	NA	NA	NA
F1Q949	F1Q949	cpsf4	>tr|F1Q949|F1Q949_DANRE Uncharacterized protein OS=Danio rerio PE=4 SV=1	1	5	27.7	3.59e-24	41954000	32931000	NA	NA	NA	NA	32601000	NA	19520000	NA	NA	NA
F1Q9D1	F1Q9D1	alyref	>tr|F1Q9D1|F1Q9D1_DANRE Uncharacterized protein OS=Danio rerio PE=4 SV=1	1	8	30.7	0	50199000	103630000	103210000	NA	NA	NA	362390000	385340000	274970000	NA	NA	NA
F1QSX5;F1QA42	F1QSX5;F1QA42	atxn2l	>tr|F1QSX5|F1QSX5_DANRE Ataxin 2-like OS=Danio rerio GN=atxn2l PE=4 SV=1;>tr|F1QA42|F1QA42_DANRE Ataxin 2-like OS=Danio rerio GN=atxn2l PE=4 SV=1	2	14	17.9	6.43e-99	88500000	44313000	NA	NA	NA	NA	90642000	175320000	108300000	NA	NA	NA
F1QAR1;F1QH55	F1QAR1;F1QH55	zc3h7a	>tr|F1QAR1|F1QAR1_DANRE Zinc finger CCCH-type-containing 7A (Fragment) OS=Danio rerio GN=zc3h7a PE=4 SV=1;>tr|F1QH55|F1QH55_DANRE Zinc finger CCCH-type-containing 7A OS=Danio rerio GN=zc3h7a PE=4 SV=1	2	8	8.9	5.16e-16	NA	NA	NA	NA	NA	NA	34493000	38634000	68677000	NA	NA	NA
F1QJ44;F1QAW2;F1QSJ7	F1QJ44;F1QAW2;F1QSJ7	zgc:56304	>tr|F1QJ44|F1QJ44_DANRE Zgc:56304 (Fragment) OS=Danio rerio GN=zgc:56304 PE=4 SV=1;>tr|F1QAW2|F1QAW2_DANRE Zgc:56304 (Fragment) OS=Danio rerio GN=zgc:56304 PE=4 SV=1;>tr|F1QSJ7|F1QSJ7_DANRE Zgc:56304 (Fragment) OS=Danio rerio GN=zgc:56304 PE=4 SV=1	3	12	33.5	9.92e-65	93248000	63731000	100080000	NA	NA	NA	106040000	97759000	473590000	NA	NA	NA
F1QB54	F1QB54	pabpc1a	>tr|F1QB54|F1QB54_DANRE Poly A binding protein, cytoplasmic 1 a OS=Danio rerio GN=pabpc1a PE=4 SV=1	1	34	59.1	0	2411500000	2186900000	1105500000	NA	6855300	22914000	3500100000	3196800000	2707200000	NA	24826000	NA
F1QCP1;F1R9E5	F1QCP1;F1R9E5	prrc2c	>tr|F1QCP1|F1QCP1_DANRE Si:ch211-191d7.6 OS=Danio rerio GN=si:ch211-191d7.6 PE=4 SV=1;>tr|F1R9E5|F1R9E5_DANRE Si:ch211-191d7.6 OS=Danio rerio GN=si:ch211-191d7.6 PE=4 SV=2	2	21	11.1	1.65e-69	NA	NA	NA	NA	NA	NA	73431000	46800000	125920000	NA	NA	NA
Q32LU7;F1QDD8	Q32LU7;F1QDD8	ptcd3	>sp|Q32LU7|PTCD3_DANRE Pentatricopeptide repeat-containing protein 3, mitochondrial OS=Danio rerio GN=ptcd3 PE=2 SV=1;>tr|F1QDD8|F1QDD8_DANRE Pentatricopeptide repeat domain 3 OS=Danio rerio GN=ptcd3 PE=4 SV=1	2	7	13.9	2.25e-60	103390000	72136000	70750000	NA	NA	NA	70266000	88062000	70500000	NA	NA	NA
F1QF96;F1QYE1	F1QF96;F1QYE1	r3hdm1	>tr|F1QF96|F1QF96_DANRE Uncharacterized protein (Fragment) OS=Danio rerio PE=4 SV=1;>tr|F1QYE1|F1QYE1_DANRE Uncharacterized protein (Fragment) OS=Danio rerio PE=4 SV=1	2	8	10.4	2.2e-28	75559000	44493000	NA	NA	NA	NA	49552000	39801000	51188000	NA	NA	NA
F1QFJ8	F1QFJ8	hnrnph1l	>tr|F1QFJ8|F1QFJ8_DANRE Heterogeneous nuclear ribonucleoprotein H1,-like OS=Danio rerio GN=hnrnph1l PE=4 SV=1	1	11	43.5	0	1516100000	1142800000	987140000	NA	7634400	7158900	1461800000	1717200000	980730000	NA	417510000	127630000
F1QFV2;F1QS20;F1R2T6;F1R4I4	F1QFV2	hnrnpa1	>tr|F1QFV2|F1QFV2_DANRE Heterogeneous nuclear ribonucleoprotein A1 OS=Danio rerio GN=hnrnpa1 PE=4 SV=1	4	18	43.9	0	336410000	228300000	60880000	NA	14899000	NA	267660000	367930000	940810000	NA	140910000	NA
F1QFV6	F1QFV6	rpl28	>tr|F1QFV6|F1QFV6_DANRE Ribosomal protein L28 OS=Danio rerio GN=rpl28 PE=4 SV=1	1	5	34.1	8.08e-59	NA	NA	NA	NA	NA	NA	902890000	462760000	412870000	NA	NA	NA
F1QG05;Q5BLD6	F1QG05	ptbp2a	>tr|F1QG05|F1QG05_DANRE Uncharacterized protein OS=Danio rerio PE=4 SV=1	2	15	37.9	2.06e-157	286880000	295690000	194550000	NA	NA	NA	810700000	352750000	567880000	104790000	88090000	NA
F1QG80	F1QG80	rpl22	>tr|F1QG80|F1QG80_DANRE Zgc:123327 OS=Danio rerio GN=zgc:123327 PE=4 SV=1	1	3	27	5.62e-29	285390000	345950000	177780000	NA	NA	NA	150740000	211390000	96846000	NA	NA	NA
F1QHJ1	F1QHJ1	rps26l	>tr|F1QHJ1|F1QHJ1_DANRE Ribosomal protein S26,-like OS=Danio rerio GN=rps26l PE=4 SV=1	1	4	34.8	3.44e-64	502790000	410630000	NA	NA	NA	104030000	616010000	424450000	740080000	NA	NA	NA
F1QIP2	F1QIP2	zgc:55733	>tr|F1QIP2|F1QIP2_DANRE Zgc:55733 OS=Danio rerio GN=zgc:55733 PE=4 SV=1	1	20	55.2	3.55e-189	1828900000	1703500000	2233600000	NA	NA	NA	2506200000	2661300000	2640000000	NA	1845700000	NA
Q7ZW47;F1QJT6;F1QTC1;F1Q5V4;E9QIB8	Q7ZW47;F1QJT6	stau2	>sp|Q7ZW47|STAU2_DANRE Double-stranded RNA-binding protein Staufen homolog 2 OS=Danio rerio GN=stau2 PE=2 SV=2;>tr|F1QJT6|F1QJT6_DANRE Staufen, RNA binding protein, homolog 2 (Drosophila) OS=Danio rerio GN=stau2 PE=4 SV=1	5	27	50.2	0	771320000	345260000	224970000	NA	4314600	11143000	1756700000	1295200000	1230000000	NA	NA	NA
F1QKB8;Q1LX57;Q1LX58	F1QKB8	si:dkey-24l11.3	>tr|F1QKB8|F1QKB8_DANRE Si:dkey-24l11.3 OS=Danio rerio GN=si:dkey-24l11.3 PE=4 SV=1	3	8	12.2	4.39e-21	89912000	78901000	147620000	NA	NA	NA	117160000	125610000	124340000	NA	NA	NA
F1QLU3;F1QRS6;Q803J4;F1RCV7;E9QCG8;E9QCK8	F1QLU3;F1QRS6;Q803J4;F1RCV7;E9QCG8	hnrnpc	>tr|F1QLU3|F1QLU3_DANRE Uncharacterized protein OS=Danio rerio PE=4 SV=1;>tr|F1QRS6|F1QRS6_DANRE Uncharacterized protein OS=Danio rerio PE=4 SV=1;>tr|Q803J4|Q803J4_DANRE Uncharacterized protein OS=Danio rerio GN=zgc:55701 PE=2 SV=1;>tr|F1RCV7|F1RCV7_DANRE	6	22	50.5	0	14000000000	13600000000	13300000000	1955900	7808800	5990800	16900000000	15300000000	16600000000	NA	610140000	10882000
F1QML8	F1QML8	akap8l	>tr|F1QML8|F1QML8_DANRE A kinase (PRKA) anchor protein 8-like OS=Danio rerio GN=akap8l PE=4 SV=1	1	15	29.9	3.04e-75	94118000	175400000	104520000	NA	NA	NA	164150000	129750000	153850000	NA	NA	NA
F1QQ28;F1R2E7	F1QQ28	eif4h	>tr|F1QQ28|F1QQ28_DANRE Eukaryotic translation initiation factor 4h OS=Danio rerio GN=eif4h PE=4 SV=1	2	12	51.5	0	407310000	263160000	352840000	NA	NA	NA	697640000	795870000	1693900000	NA	NA	NA
F1QQQ3;F1QPC0	F1QQQ3	vtg3	>tr|F1QQQ3|F1QQQ3_DANRE Vitellogenin 3, phosvitinless (Fragment) OS=Danio rerio GN=vtg3 PE=4 SV=1	2	7	6.7	4.59e-27	NA	NA	NA	NA	NA	NA	167640000	39576000	55468000	NA	NA	NA
F1QRD4;Q66HY6	F1QRD4;Q66HY6	ncoa5	>tr|F1QRD4|F1QRD4_DANRE Zgc:92194 OS=Danio rerio GN=zgc:92194 PE=4 SV=1;>tr|Q66HY6|Q66HY6_DANRE Zgc:92194 OS=Danio rerio GN=zgc:92194 PE=2 SV=1	2	10	17.8	4.17e-28	93310000	44467000	76078000	NA	NA	NA	113790000	99692000	99555000	NA	NA	NA
F1QS28	F1QS28	hnrnpa0a	>tr|F1QS28|F1QS28_DANRE Zgc:77366 OS=Danio rerio GN=zgc:77366 PE=4 SV=1	1	10	35.4	2.14e-239	263740000	527420000	420010000	NA	NA	6621400	420400000	440610000	788180000	NA	53665000	NA
F1QTL9;F8W265	F1QTL9;F8W265	hnrnpa0b	>tr|F1QTL9|F1QTL9_DANRE Heterogeneous nuclear ribonucleoprotein A0 OS=Danio rerio GN=hnrnpa0 PE=4 SV=1;>tr|F8W265|F8W265_DANRE Heterogeneous nuclear ribonucleoprotein A0 (Fragment) OS=Danio rerio GN=hnrnpa0 PE=4 SV=1	2	9	35.4	0	1167700000	819660000	482160000	8041400	13757000	8048600	1779100000	1346200000	2644700000	NA	571670000	127120000
F1RCD8;F1QTT5;F1RD28;E9QG77;E9QIA1	F1RCD8;F1QTT5;F1RD28;E9QG77;E9QIA1	zgc:66313;zgc:92137	>tr|F1RCD8|F1RCD8_DANRE Zgc:66313 OS=Danio rerio GN=zgc:66313 PE=3 SV=1;>tr|F1QTT5|F1QTT5_DANRE Zgc:92137 OS=Danio rerio GN=zgc:92137 PE=3 SV=1;>tr|F1RD28|F1RD28_DANRE Zgc:66313 OS=Danio rerio GN=zgc:66313 PE=3 SV=1;>tr|E9QG77|E9QG77_DANRE Zgc:66313 OS=Dan	5	2	5.5	9.27e-13	48924000	37885000	NA	146130000	153070000	42205000	NA	29899000	75733000	NA	NA	NA
F1QTW6;F1R2S5;F1QHH9	F1QTW6;F1R2S5	vtg5	>tr|F1QTW6|F1QTW6_DANRE Vitellogenin 5 OS=Danio rerio GN=vtg5 PE=4 SV=1;>tr|F1R2S5|F1R2S5_DANRE Vitellogenin 5 (Fragment) OS=Danio rerio GN=vtg5 PE=4 SV=1	3	65	51.5	0	110240000	625610000	67854000	NA	NA	NA	1648400000	427450000	935580000	NA	NA	NA
F1QV15;F1R992;F1R2S0	F1QV15	vtg6	>tr|F1QV15|F1QV15_DANRE Si:rp71-23d18.1 (Fragment) OS=Danio rerio GN=si:rp71-23d18.1 PE=4 SV=1	3	65	48.9	0	18354000	101430000	NA	NA	7230900	NA	474890000	200250000	252280000	NA	NA	NA
F1QVC6	F1QVC6	srsf9	>tr|F1QVC6|F1QVC6_DANRE Serine/arginine-rich splicing factor 9 OS=Danio rerio GN=srsf9 PE=4 SV=1	1	8	30.6	7.06e-20	52952000	58144000	NA	NA	NA	NA	63683000	66258000	72363000	NA	NA	NA
F1QWB4;B0UXJ3	F1QWB4;B0UXJ3	hnrnpk	>tr|F1QWB4|F1QWB4_DANRE Heterogeneous nuclear ribonucleoprotein K OS=Danio rerio GN=hnrnpk PE=4 SV=1;>tr|B0UXJ3|B0UXJ3_DANRE Heterogeneous nuclear ribonucleoprotein K (Fragment) OS=Danio rerio GN=hnrnpk PE=4 SV=1	2	16	45.5	6.65e-123	187590000	146790000	345390000	NA	NA	NA	632670000	516020000	426900000	NA	NA	NA
F1QWP0;Q7ZUX2;F1QTG1	F1QWP0;Q7ZUX2	cstf2	>tr|F1QWP0|F1QWP0_DANRE Cleavage stimulation factor, 3 pre-RNA, subunit 2 OS=Danio rerio GN=cstf2 PE=4 SV=1;>tr|Q7ZUX2|Q7ZUX2_DANRE Cleavage stimulation factor, 3 pre-RNA, subunit 2 OS=Danio rerio GN=cstf2 PE=2 SV=1	3	6	14.1	2.51e-22	NA	NA	NA	NA	NA	NA	150380000	67182000	90028000	NA	NA	NA
F5H8N4;F1QWU3;E7F6Q6	F5H8N4;F1QWU3	lrpprc	>tr|F5H8N4|F5H8N4_DANRE Leucine-rich PPR-motif-containing (Fragment) OS=Danio rerio GN=lrpprc PE=4 SV=1;>tr|F1QWU3|F1QWU3_DANRE Leucine-rich PPR-motif-containing OS=Danio rerio GN=lrpprc PE=4 SV=1	3	59	43.9	0	3573900000	3674500000	2819600000	1655800	8203600	8004400	2147200000	2229800000	2287600000	NA	23344000	NA
F1QXG4;Q5RGK8;Q7ZT42;Q7ZT42-2;Q7ZT42-3	F1QXG4;Q5RGK8;Q7ZT42;Q7ZT42-2;Q7ZT42-3	snd1	>tr|F1QXG4|F1QXG4_DANRE Staphylococcal nuclease domain-containing 1 OS=Danio rerio GN=snd1 PE=4 SV=1;>tr|Q5RGK8|Q5RGK8_DANRE Staphylococcal nuclease domain containing 1 OS=Danio rerio GN=snd1 PE=2 SV=2;>sp|Q7ZT42|SND1_DANRE Staphylococcal nuclease domain-c	5	31	36.2	3.66e-231	449810000	284520000	743530000	NA	NA	NA	659950000	402000000	858100000	NA	137530000	NA
F1QXP8;H0WEH3	F1QXP8	khsrp	>tr|F1QXP8|F1QXP8_DANRE KH-type-splicing regulatory protein OS=Danio rerio GN=khsrp PE=4 SV=1	2	30	56.9	0	4246700000	4603300000	5045200000	3168900	NA	NA	6450000000	2387700000	7745300000	NA	85655000	NA
Q6NUZ3;F1QY96;F6NN54	Q6NUZ3;F1QY96;F6NN54	syncrip	>tr|Q6NUZ3|Q6NUZ3_DANRE Synaptotagmin binding, cytoplasmic RNA interacting protein OS=Danio rerio GN=syncrip PE=2 SV=1;>tr|F1QY96|F1QY96_DANRE Synaptotagmin-binding, cytoplasmic RNA-interacting protein OS=Danio rerio GN=syncrip PE=4 SV=1;>tr|F6NN54|F6NN54_	3	17	32.2	0	923010000	833760000	203530000	34390000	65560000	58099000	871840000	1143300000	892710000	NA	229500000	NA
F1QZC1	F1QZC1	rbfox2	>tr|F1QZC1|F1QZC1_DANRE RNA-binding protein, fox-1 homolog (C. elegans) 2 OS=Danio rerio GN=rbfox2 PE=4 SV=1	1	5	18.7	6.01e-18	137740000	114900000	156790000	NA	NA	NA	245260000	155510000	180140000	NA	NA	NA
F1QZN1;F1QED0	F1QZN1;F1QED0	fubp3	>tr|F1QZN1|F1QZN1_DANRE Zgc:101598 (Fragment) OS=Danio rerio GN=zgc:101598 PE=4 SV=1;>tr|F1QED0|F1QED0_DANRE Zgc:101598 (Fragment) OS=Danio rerio GN=zgc:101598 PE=4 SV=1	2	13	48.7	0	1960000000	1928400000	2686900000	43993000	NA	5615700	4238100000	3111100000	3598400000	NA	NA	NA
F1R331;F1QZT4;F1RDM4	F1R331;F1QZT4	zgc:152816	>tr|F1R331|F1R331_DANRE Zgc:152816 OS=Danio rerio GN=zgc:152816 PE=4 SV=1;>tr|F1QZT4|F1QZT4_DANRE Zgc:152816 OS=Danio rerio GN=zgc:152816 PE=4 SV=1	3	15	22.5	4.52e-180	149450000	144260000	367430000	NA	NA	NA	182600000	92135000	188200000	NA	NA	NA
F1QZW7;F1QRI4	F1QZW7	ilf3a	>tr|F1QZW7|F1QZW7_DANRE Interleukin enhancer binding factor 3a OS=Danio rerio GN=ilf3a PE=4 SV=1	2	20	31.5	3.05e-187	66427000	83540000	64508000	NA	NA	NA	69142000	146300000	168720000	NA	NA	NA
F1R0U5	F1R0U5	larp1	>tr|F1R0U5|F1R0U5_DANRE La ribonucleoprotein domain family, member 1 OS=Danio rerio GN=larp1 PE=4 SV=1	1	7	8.7	7.27e-156	NA	NA	NA	NA	NA	NA	69244000	74008000	88309000	NA	NA	NA
F1R2E0;E9QEE4;Q1LVZ5;F8W2D3	F1R2E0;E9QEE4	hnrnpm	>tr|F1R2E0|F1R2E0_DANRE Heterogeneous nuclear ribonucleoprotein M OS=Danio rerio GN=hnrnpm PE=4 SV=2;>tr|E9QEE4|E9QEE4_DANRE Heterogeneous nuclear ribonucleoprotein M OS=Danio rerio GN=hnrnpm PE=4 SV=1	4	34	57.2	0	1119700000	642890000	2095800000	NA	NA	17364000	1306400000	733490000	2640000000	236970000	NA	NA
Q1MTC6;F1R2T3;F1R743	Q1MTC6;F1R2T3	vtg7	>tr|Q1MTC6|Q1MTC6_DANRE Novel protein similar to vitellogenin 1 (Vg1) OS=Danio rerio GN=vtg7 PE=4 SV=1;>tr|F1R2T3|F1R2T3_DANRE Vitellogenin 7 OS=Danio rerio GN=vtg7 PE=4 SV=1	3	62	49.4	0	25321000	267020000	105820000	17715000	14960000	34873000	809420000	156680000	384480000	NA	533930000	184600000
F1R368	F1R368	wu:fc56b07	>tr|F1R368|F1R368_DANRE Wu:fc56b07 (Fragment) OS=Danio rerio GN=wu:fc56b07 PE=4 SV=1	1	4	12.9	1.35e-08	15076000	17420000	NA	NA	NA	NA	33291000	33862000	20757000	NA	NA	NA
F1R6L3;E7EYX7	F1R6L3;E7EYX7	cirbp	>tr|F1R6L3|F1R6L3_DANRE Cold-inducible RNA-binding protein (Fragment) OS=Danio rerio GN=cirbp PE=4 SV=1;>tr|E7EYX7|E7EYX7_DANRE Cold inducible RNA binding protein OS=Danio rerio GN=OTTDARG00000010532 PE=4 SV=1	2	12	48.2	0	11800000000	13600000000	16000000000	105640000	106410000	112060000	15000000000	11600000000	18100000000	NA	1378200000	1301400000
F1R6P0	F1R6P0	mrps5	>tr|F1R6P0|F1R6P0_DANRE Mitochondrial ribosomal protein S5 OS=Danio rerio GN=mrps5 PE=3 SV=1	1	2	5.8	2.95e-08	NA	24059000	NA	NA	NA	NA	61927000	42827000	41962000	NA	NA	NA
F1R8D7	F1R8D7	syncripl	>tr|F1R8D7|F1R8D7_DANRE Synaptotagmin-binding, cytoplasmic RNA-interacting protein,-like OS=Danio rerio GN=syncripl PE=4 SV=1	1	25	53	0	6418500000	8280000000	3464300000	268500000	370310000	322380000	5715900000	9986800000	8707800000	NA	4562100000	4330800000
F1RCB2	F1RCB2	pl10	>tr|F1RCB2|F1RCB2_DANRE Pl10 OS=Danio rerio GN=pl10 PE=3 SV=1	1	43	67	0	3913700000	3021800000	3083600000	8798100	21569000	12239000	1743400000	2590800000	2441700000	3062200	83276000	NA
F1RCY6	F1RCY6	upf1	>tr|F1RCY6|F1RCY6_DANRE Upf1 regulator of nonsense transcripts homolog (yeast) OS=Danio rerio GN=upf1 PE=4 SV=1	1	26	31.2	4.48e-145	261890000	415480000	115560000	12171000	15574000	NA	196280000	240390000	187620000	NA	NA	NA
Q6NYG6;F1RDB0	Q6NYG6;F1RDB0	tdrd3	>sp|Q6NYG6|TDRD3_DANRE Tudor domain-containing protein 3 OS=Danio rerio GN=tdrd3 PE=2 SV=1;>tr|F1RDB0|F1RDB0_DANRE Zgc:77174 OS=Danio rerio GN=zgc:77174 PE=4 SV=1	2	9	15.3	1.14e-43	48974000	39144000	60493000	NA	NA	NA	64318000	46979000	94367000	NA	NA	NA
Q6NYU8;F8W4E3;F8W5P8;F8W2Z3;F8W256	Q6NYU8;F8W4E3;F8W5P8;F8W2Z3	hnrnpab	>tr|Q6NYU8|Q6NYU8_DANRE Heterogeneous nuclear ribonucleoprotein A/B OS=Danio rerio GN=hnrnpab PE=2 SV=1;>tr|F8W4E3|F8W4E3_DANRE Heterogeneous nuclear ribonucleoprotein A/B (Fragment) OS=Danio rerio GN=hnrnpab PE=4 SV=1;>tr|F8W5P8|F8W5P8_DANRE Heterogeneous	5	12	32.6	2.46e-161	1387800000	1507600000	1253500000	NA	10198000	NA	2013100000	2199700000	2397300000	NA	134360000	NA
Q7ZVR8;G1K2G8;Q7ZVR8-2;G1K2P5;A1L1G1	Q7ZVR8;G1K2G8;Q7ZVR8-2;G1K2P5	esrp2	>sp|Q7ZVR8|ESRP2_DANRE Epithelial splicing regulatory protein 2 OS=Danio rerio GN=esrp2 PE=2 SV=2;>tr|G1K2G8|G1K2G8_DANRE Epithelial-splicing regulatory protein 2 OS=Danio rerio GN=esrp2 PE=4 SV=1;>sp|Q7ZVR8-2|ESRP2_DANRE Isoform 2 of Epithelial splicing r	5	13	19.7	1.72e-103	120270000	54750000	NA	NA	NA	NA	94062000	137770000	77837000	NA	NA	NA
P62247;B5DDE8	P62247	rps8	>sp|P62247|RS8_DANRE 40S ribosomal protein S8 OS=Danio rerio GN=rps8 PE=2 SV=2	2	7	37	1.26e-75	151460000	128960000	57189000	12294000	36184000	34093000	657860000	327840000	211850000	NA	NA	NA
Q1L8R2	Q1L8R2	sfpq	>tr|Q1L8R2|Q1L8R2_DANRE Splicing factor proline/glutamine rich (Polypyrimidine tract binding protein associated) OS=Danio rerio GN=sfpq PE=2 SV=1	1	11	18.7	1.11e-42	126980000	103330000	119940000	NA	NA	NA	154950000	111260000	121340000	NA	NA	NA
Q1L8T3;Q1L8T2	Q1L8T3;Q1L8T2	ubap2l	>tr|Q1L8T3|Q1L8T3_DANRE Novel protein similar to vertebrate ubiquitin associated protein 2-like (UBAP2L) OS=Danio rerio GN=ubap2l PE=2 SV=1;>tr|Q1L8T2|Q1L8T2_DANRE Novel protein similar to vertebrate ubiquitin associated protein 2-like (UBAP2L) OS=Danio re	2	5	6.3	9.99e-21	NA	NA	NA	NA	NA	NA	19550000	14730000	30940000	NA	NA	NA
Q1LUN5;Q9YGW7;Q1LUN6	Q1LUN5;Q9YGW7;Q1LUN6	dazl	>tr|Q1LUN5|Q1LUN5_DANRE Daz-like gene OS=Danio rerio GN=dazl PE=2 SV=1;>sp|Q9YGW7|DAZL_DANRE Deleted in azoospermia-like OS=Danio rerio GN=dazl PE=1 SV=1;>tr|Q1LUN6|Q1LUN6_DANRE Daz-like gene OS=Danio rerio GN=dazl PE=2 SV=1	3	5	29.7	3.1e-39	541830000	352740000	432800000	NA	NA	NA	244340000	202270000	276480000	NA	NA	NA
Q1LUY0	Q1LUY0	parp12a	>tr|Q1LUY0|Q1LUY0_DANRE Novel protein similar to vertebrate zinc finger CCCH type domain containing 1 (ZC3HDC1) OS=Danio rerio GN=parp12a PE=4 SV=1	1	3	6.2	4.95e-09	NA	NA	NA	NA	NA	NA	86180000	63491000	41951000	NA	NA	NA
Q1LV81;F1QB05;F1QVW3;E7FFA2	Q1LV81;F1QB05;F1QVW3	safb	>tr|Q1LV81|Q1LV81_DANRE Novel protein similar to vertebrate scaffold attachment factor B family (Zgc:55387) OS=Danio rerio GN=safb PE=2 SV=1;>tr|F1QB05|F1QB05_DANRE Scaffold attachment factor B OS=Danio rerio GN=safb PE=4 SV=1;>tr|F1QVW3|F1QVW3_DANRE Scaff	4	5	5.7	5.82e-21	NA	NA	NA	NA	NA	NA	84333000	40585000	60914000	NA	NA	NA
Q1LWN2;F1R8M4	Q1LWN2	vtg1	>tr|Q1LWN2|Q1LWN2_DANRE Vitellogenin 1 OS=Danio rerio GN=vtg1 PE=2 SV=1	2	67	51.3	0	1467300000	5738800000	981080000	57684000	352200000	267180000	17800000000	8598700000	10300000000	NA	8870000000	8868100000
Q1MT19;Q6GQM6;F1QLQ7;Q1MT20;Q90409;F1QGR7;F1R133;F1QGN3;Q6P105;F1R0S9	Q1MT19;Q6GQM6;F1QLQ7	elavl2	>tr|Q1MT19|Q1MT19_DANRE ELAV (embryonic lethal, abnormal vision, Drosophila)-like 2 (Hu antigen B) OS=Danio rerio GN=elavl2 PE=2 SV=1;>tr|Q6GQM6|Q6GQM6_DANRE ELAV (embryonic lethal, abnormal vision, Drosophila)-like 2 (Hu antigen B) OS=Danio rerio GN=elavl	10	10	29.9	4.65e-38	56827000	48590000	47767000	NA	NA	NA	76405000	116010000	126530000	NA	NA	NA
Q1MTC4;F1R876	Q1MTC4	vtg2	>tr|Q1MTC4|Q1MTC4_DANRE Novel protein similar to vitellogenin 1 (Vg1) OS=Danio rerio GN=vtg2 PE=4 SV=1	2	62	43.3	0	105200000	434350000	47240000	NA	45716000	NA	4212700000	1287200000	1812800000	NA	839700000	732450000
Q24JV3	Q24JV3	rpl31	>tr|Q24JV3|Q24JV3_DANRE Zgc:136896 OS=Danio rerio GN=zgc:136896 PE=2 SV=1	1	4	33.3	3.27e-62	NA	NA	NA	NA	NA	NA	286530000	132150000	87198000	NA	NA	NA
Q803E3;Q4QRG0	Q803E3;Q4QRG0	ewsr1b	>tr|Q803E3|Q803E3_DANRE Ewing sarcoma breakpoint region 1b OS=Danio rerio GN=ewsr1b PE=2 SV=1;>tr|Q4QRG0|Q4QRG0_DANRE Ewing sarcoma breakpoint region 1b OS=Danio rerio GN=ewsr1b PE=2 SV=1	2	4	6.2	7.98e-73	222460000	222020000	192350000	NA	NA	NA	600930000	487430000	542250000	NA	NA	NA
Q4VBV2	Q4VBV2	rps27.1	>tr|Q4VBV2|Q4VBV2_DANRE 40S ribosomal protein S27 OS=Danio rerio GN=CH211-39A7.2 PE=2 SV=1	1	3	38.1	3.77e-08	NA	NA	NA	NA	NA	NA	127010000	34915000	45318000	NA	NA	NA
Q503D3	Q503D3	ptbp1a	>tr|Q503D3|Q503D3_DANRE Novel protein similar to vertebrate polypyrimidine tract binding protein 1 (PTBP1, zgc:110689) OS=Danio rerio GN=ptbp1a PE=2 SV=1	1	9	15	5e-101	122630000	83344000	116660000	NA	NA	NA	186100000	136710000	143300000	NA	NA	NA
Q566W6	Q566W6	zgc:112425	>tr|Q566W6|Q566W6_DANRE Zgc:112425 OS=Danio rerio GN=zgc:112425 PE=2 SV=1	1	10	55.1	0	1989800000	1699500000	1026600000	NA	9203100	32138000	2261700000	2453100000	4356600000	NA	153510000	NA
Q567N5	Q567N5	rpl6	>tr|Q567N5|Q567N5_DANRE Ribosomal protein L6 OS=Danio rerio GN=rpl6 PE=2 SV=1	1	7	29.1	4.32e-136	69829000	169940000	63591000	NA	26017000	NA	611200000	142250000	297110000	NA	NA	NA
Q5RHQ7	Q5RHQ7	hnrnpub	>tr|Q5RHQ7|Q5RHQ7_DANRE Heterogeneous nuclear ribonucleoprotein U OS=Danio rerio GN=hnrnpu PE=2 SV=1	1	9	11.6	1.43e-38	NA	NA	NA	NA	NA	NA	190570000	212610000	250020000	NA	NA	NA
Q642H9	Q642H9	rps4x	>sp|Q642H9|RS4X_DANRE 40S ribosomal protein S4, X isoform OS=Danio rerio GN=rps4x PE=2 SV=3	1	9	34.2	9.3e-26	151610000	111290000	166820000	NA	NA	NA	136430000	244240000	324740000	NA	NA	NA
Q6DHL6	Q6DHL6	rps6	>tr|Q6DHL6|Q6DHL6_DANRE 40S ribosomal protein S6 OS=Danio rerio GN=zgc:92237 PE=2 SV=1	1	4	17.7	2.29e-21	65084000	62261000	168350000	NA	15563000	20211000	274850000	221830000	433390000	NA	NA	NA
Q6DRC4	Q6DRC4	eif3g	>sp|Q6DRC4|EIF3G_DANRE Eukaryotic translation initiation factor 3 subunit G OS=Danio rerio GN=eif3g PE=1 SV=1	1	8	42	5.43e-51	84890000	60512000	76280000	NA	NA	NA	108350000	85957000	237420000	NA	NA	NA
Q6IQ97	Q6IQ97	rbm4.1	>sp|Q6IQ97|RBM41_DANRE RNA-binding protein 4.1 OS=Danio rerio GN=rbm4.1 PE=1 SV=1	1	11	32.2	2.08e-141	NA	NA	NA	NA	NA	NA	63588000	59902000	75037000	NA	NA	NA
Q6P5M9;Q6IQJ2;F1R6Y8;F1RBW2;F1QEH9	Q6P5M9;Q6IQJ2;F1R6Y8;F1RBW2;F1QEH9	tubb4b	>tr|Q6P5M9|Q6P5M9_DANRE Tubulin, beta 2c OS=Danio rerio GN=tubb2c PE=2 SV=1;>tr|Q6IQJ2|Q6IQJ2_DANRE Novel protein (Zgc:55461) OS=Danio rerio GN=DKEY-2N12.2 PE=2 SV=1;>tr|F1R6Y8|F1R6Y8_DANRE Zgc:123194 OS=Danio rerio GN=zgc:123194 PE=3 SV=1;>tr|F1RBW2|F1RBW	5	7	19.1	2.66e-21	11563000	13852000	26988000	22948000	22669000	18893000	23935000	16211000	19330000	NA	NA	NA
Q6NW62;Q08BJ2	Q6NW62	khdrbs1b	>tr|Q6NW62|Q6NW62_DANRE KH domain containing, RNA binding, signal transduction associated 1b OS=Danio rerio GN=khdrbs1b PE=2 SV=1	2	7	17.9	5.31e-21	324200000	302280000	324490000	NA	NA	NA	377500000	300640000	312650000	NA	NA	NA
Q6NWC3;E9QDR0	Q6NWC3	rps2	>tr|Q6NWC3|Q6NWC3_DANRE Ribosomal protein S2 OS=Danio rerio GN=rps2 PE=2 SV=1	2	13	49.3	3.77e-167	1663600000	1541800000	2125500000	12072000	19855000	35916000	1120500000	713160000	2394100000	NA	NA	NA
Q6NWC6;Q6NWC6-2;G8JL13;Q1L8Q3;H0WFE8	Q6NWC6;Q6NWC6-2	cpsf6	>sp|Q6NWC6|CPSF6_DANRE Cleavage and polyadenylation specificity factor subunit 6 OS=Danio rerio GN=cpsf6 PE=2 SV=1;>sp|Q6NWC6-2|CPSF6_DANRE Isoform 2 of Cleavage and polyadenylation specificity factor subunit 6 OS=Danio rerio GN=cpsf6	5	7	18.7	6.48e-36	43367000	52399000	NA	NA	NA	NA	NA	54522000	47331000	NA	NA	NA
Q6NXC1	Q6NXC1	rbm4.3	>tr|Q6NXC1|Q6NXC1_DANRE RNA binding motif protein 4.3 OS=Danio rerio GN=rbm4.3 PE=2 SV=1	1	26	68	6.44e-249	1665600000	1630000000	956210000	NA	2201300	23366000	1787900000	1420100000	1441100000	NA	110840000	124510000
Q6NY74	Q6NY74	rpa1	>sp|Q6NY74|RFA1_DANRE Replication protein A 70 kDa DNA-binding subunit OS=Danio rerio GN=rpa1 PE=1 SV=1	1	5	9.7	2.35e-17	NA	NA	NA	NA	NA	NA	21735000	40438000	26479000	NA	NA	NA
Q6NYA1	Q6NYA1	zgc:77052	>tr|Q6NYA1|Q6NYA1_DANRE Zgc:77052 OS=Danio rerio GN=zgc:77052 PE=2 SV=1	1	13	36.6	0	6798200000	6892400000	2179700000	64570000	151980000	129090000	4007600000	3485400000	3661500000	NA	752080000	236050000
Q6NZ06	Q6NZ06	ilf2	>sp|Q6NZ06|ILF2_DANRE Interleukin enhancer-binding factor 2 homolog OS=Danio rerio GN=ilf2 PE=2 SV=1	1	10	30.2	1.01e-134	93995000	121860000	25280000	NA	NA	NA	111780000	182390000	99663000	NA	NA	NA
Q6NZS4	Q6NZS4	zgc:76871	>sp|Q6NZS4|RTCB_DANRE tRNA-splicing ligase RtcB homolog OS=Danio rerio GN=zgc:76871 PE=2 SV=1	1	6	14.5	1.54e-15	30055000	21320000	37111000	NA	NA	NA	51311000	55279000	65166000	NA	NA	NA
Q6P022;F1QVD2;E7F8Y4	Q6P022;F1QVD2;E7F8Y4	u2af2b;u2af2a	>tr|Q6P022|Q6P022_DANRE Novel protein (Zgc:77804) OS=Danio rerio GN=u2af2b PE=2 SV=1;>tr|F1QVD2|F1QVD2_DANRE U2 small nuclear RNA auxiliary factor 2a OS=Danio rerio GN=u2af2a PE=4 SV=1;>tr|E7F8Y4|E7F8Y4_DANRE U2 small nuclear RNA auxiliary factor 2a OS=Dan	3	6	16.4	1.04e-20	NA	NA	NA	NA	NA	NA	36577000	34227000	45542000	NA	NA	NA
Q6P0B2	Q6P0B2	lsm14ab	>tr|Q6P0B2|Q6P0B2_DANRE C19orf13-like protein OS=Danio rerio GN=lsm14ab PE=2 SV=1	1	16	38.2	0	143490000	103790000	95061000	NA	NA	NA	313090000	379100000	394200000	NA	NA	NA
Q6P0G2	Q6P0G2	zgc:77262	>tr|Q6P0G2|Q6P0G2_DANRE Zgc:77262 OS=Danio rerio GN=zgc:77262 PE=2 SV=1	1	11	41.1	1.33e-43	109950000	119640000	134030000	NA	NA	NA	128840000	95751000	111910000	NA	NA	NA
Q6P0V0	Q6P0V0	hnrnph1	>tr|Q6P0V0|Q6P0V0_DANRE Heterogeneous nuclear ribonucleoprotein H1 OS=Danio rerio GN=hnrnph1 PE=2 SV=1	1	9	31.8	2.4e-250	169160000	100270000	125850000	NA	NA	NA	91266000	71427000	76255000	NA	NA	NA
Q6P0V6;B0S6P5	Q6P0V6	rpl8	>sp|Q6P0V6|RL8_DANRE 60S ribosomal protein L8 OS=Danio rerio GN=rpl8 PE=2 SV=3	2	11	39.3	1.24e-79	394720000	749730000	820720000	NA	NA	4896300	1477200000	1303300000	1030600000	NA	NA	NA
Q6P111;F1Q8I5;F1QIS2;F1QIF2	Q6P111;F1Q8I5	lsm14aa	>tr|Q6P111|Q6P111_DANRE LSM14 homolog A (SCD6, S. cerevisiae) OS=Danio rerio GN=lsm14aa PE=1 SV=1;>tr|F1Q8I5|F1Q8I5_DANRE LSM14 homolog Aa (SCD6, S. cerevisiae) OS=Danio rerio GN=lsm14aa PE=4 SV=1	4	18	43.3	0	988210000	1090000000	598760000	10098000	22647000	32728000	972970000	1019200000	1974900000	NA	78256000	NA
Q6P124;F1QJB8;F1QX72;F1QGX3;F1QFP9	Q6P124;F1QJB8	g3bp1	>tr|Q6P124|Q6P124_DANRE GTPase activating protein (SH3 domain) binding protein 1 OS=Danio rerio GN=g3bp1 PE=2 SV=1;>tr|F1QJB8|F1QJB8_DANRE GTPase-activating protein (SH3 domain)-binding protein 1 (Fragment) OS=Danio rerio GN=g3bp1 PE=4 SV=1	5	9	22.9	1.02e-36	43118000	30576000	85442000	NA	NA	NA	NA	43428000	131380000	NA	NA	NA
Q6P2A9	Q6P2A9	fubp1	>tr|Q6P2A9|Q6P2A9_DANRE Far upstream element (FUSE) binding protein 1 OS=Danio rerio GN=fubp1 PE=2 SV=1	1	21	40.8	3.91e-181	584910000	635150000	702670000	NA	NA	NA	861810000	639020000	739900000	NA	NA	NA
Q6P5L3	Q6P5L3	rpl19	>sp|Q6P5L3|RL19_DANRE 60S ribosomal protein L19 OS=Danio rerio GN=rpl19 PE=2 SV=1	1	3	13.8	6.97e-24	NA	NA	NA	NA	NA	NA	NA	95588000	80350000	NA	NA	NA
Q6PBK3	Q6PBK3	rps28	>sp|Q6PBK3|RS28_DANRE 40S ribosomal protein S28 OS=Danio rerio GN=rps28 PE=3 SV=1	1	3	46.4	7.4e-14	20366000	11899000	NA	NA	NA	NA	40753000	47663000	156790000	NA	NA	NA
Q6PBW3	Q6PBW3	rps14	>tr|Q6PBW3|Q6PBW3_DANRE Ribosomal protein S14 OS=Danio rerio GN=rps14 PE=2 SV=1	1	8	40.4	2.57e-31	127460000	86285000	231150000	11578000	NA	NA	435280000	289320000	703080000	NA	NA	NA
Q6PBY1	Q6PBY1	rps3a	>sp|Q6PBY1|RS3A_DANRE 40S ribosomal protein S3a OS=Danio rerio GN=rps3a PE=2 SV=3	1	9	39.7	2.53e-24	149110000	97943000	344960000	NA	17833000	NA	295380000	91644000	140330000	NA	NA	NA
Q6PBY3	Q6PBY3	edf1	>sp|Q6PBY3|EDF1_DANRE Endothelial differentiation-related factor 1 homolog OS=Danio rerio GN=edf1 PE=2 SV=1	1	8	47.3	2.53e-22	111720000	88649000	190540000	NA	NA	NA	147230000	85362000	236240000	NA	NA	NA
Q6PBZ1	Q6PBZ1	rpl7a	>tr|Q6PBZ1|Q6PBZ1_DANRE Ribosomal protein L7a OS=Danio rerio GN=rpl7a PE=2 SV=1	1	9	30.5	5.68e-45	40612000	67234000	47938000	NA	NA	17850000	301410000	137920000	102430000	NA	NA	NA
Q6PC14	Q6PC14	rpl23	>sp|Q6PC14|RL23_DANRE 60S ribosomal protein L23 OS=Danio rerio GN=rpl23 PE=2 SV=1	1	2	21.4	1.6e-19	NA	NA	NA	NA	NA	NA	159010000	58808000	46761000	NA	NA	NA
Q6PC80	Q6PC80	rps5	>tr|Q6PC80|Q6PC80_DANRE Ribosomal protein S5 OS=Danio rerio GN=rps5 PE=2 SV=1	1	5	24.5	5.51e-19	NA	NA	NA	NA	NA	NA	NA	33631000	57276000	NA	NA	NA
Q6PCR7	Q6PCR7	eif3a	>sp|Q6PCR7|EIF3A_DANRE Eukaryotic translation initiation factor 3 subunit A OS=Danio rerio GN=eif3a PE=2 SV=1	1	22	19.7	1.79e-121	94726000	37023000	86196000	NA	NA	NA	189600000	90939000	365740000	NA	68393000	NA
Q6PI52	Q6PI52	calm1a	>sp|Q6PI52|CALM_DANRE Calmodulin OS=Danio rerio GN=calm1a PE=2 SV=3	1	5	36.9	1.82e-146	24798000	29539000	58677000	76498000	140990000	54889000	NA	728960000	25033000	NA	NA	NA
Q6Q417	Q6Q417	rpl7	>tr|Q6Q417|Q6Q417_DANRE Ribosomal protein L7 OS=Danio rerio GN=rpl7 PE=2 SV=1	1	6	19.5	5.43e-17	NA	NA	NA	NA	NA	NA	180450000	119060000	81685000	NA	NA	NA
Q6TGT9;F8W2Y8	Q6TGT9	srsf5a	>tr|Q6TGT9|Q6TGT9_DANRE Serine/arginine-rich splicing factor 5a OS=Danio rerio GN=srsf5a PE=2 SV=1	2	3	12.7	5.38e-12	NA	NA	47917000	NA	NA	NA	52596000	NA	24295000	NA	NA	NA
Q6TGY6;B8K0D5;B8K0D6	Q6TGY6;B8K0D5	pabpc1l	>tr|Q6TGY6|Q6TGY6_DANRE Poly(A) binding protein, cytoplasmic 1-like OS=Danio rerio GN=pabpc1l PE=2 SV=1;>tr|B8K0D5|B8K0D5_DANRE Novel protein similar to H.sapiens PABPC1, poly(A) binding protein, cytoplasmic 1 (PABPC1, zgc:55855) (Fragment) OS=Danio rerio	3	36	69.2	0	4021700000	2798100000	1326300000	616140	4018900	5427300	5591200000	3857400000	3750000000	NA	6036900	NA
Q6TH15	Q6TH15	eif3d	>sp|Q6TH15|EIF3D_DANRE Eukaryotic translation initiation factor 3 subunit D OS=Danio rerio GN=eif3d PE=2 SV=1	1	11	23.6	3.19e-163	NA	NA	110570000	NA	NA	NA	104880000	85391000	198280000	NA	NA	NA
Q6TLG8	Q6TLG8	rps3	>tr|Q6TLG8|Q6TLG8_DANRE Ribosomal protein S3 OS=Danio rerio GN=rps3 PE=2 SV=1	1	21	80.8	9.73e-119	902580000	244630000	577170000	NA	29107000	107460000	589530000	509170000	2110000000	NA	NA	NA
Q7SXN2;F1QC42	Q7SXN2	hnrpdl	>tr|Q7SXN2|Q7SXN2_DANRE Heterogeneous nuclear ribonucleoprotein D-like OS=Danio rerio GN=hnrpdl PE=2 SV=1	2	12	42.6	7.05e-136	548080000	522040000	301000000	NA	NA	15656000	429630000	926340000	1367700000	NA	NA	NA
Q7SXP4;E9QGF8;Q6NYA0;F1QXQ1;F1RBL9;F1RCS7;E9QIC5	Q7SXP4;E9QGF8;Q6NYA0;F1QXQ1;F1RBL9;F1RCS7	srsf1a;srsf1b	>sp|Q7SXP4|SRS1A_DANRE Serine/arginine-rich splicing factor 1A OS=Danio rerio GN=srsf1a PE=2 SV=2;>tr|E9QGF8|E9QGF8_DANRE Serine/arginine-rich-splicing factor 1a OS=Danio rerio GN=srsf1a PE=4 SV=1;>sp|Q6NYA0|SRS1B_DANRE Serine/arginine-rich splicing factor	7	15	53.3	2.78e-49	187890000	179410000	235020000	NA	NA	NA	325080000	357980000	405880000	NA	NA	NA
Q7SZC9	Q7SZC9	hnrnpr	>tr|Q7SZC9|Q7SZC9_DANRE Heterogeneous nuclear ribonucleoprotein R OS=Danio rerio GN=hnrpr PE=2 SV=1	1	14	77.6	0	1262600000	1019900000	712630000	16470000	23130000	13027000	899940000	1409100000	1473400000	NA	493810000	NA
Q7ZTI0	Q7ZTI0	ssb	>tr|Q7ZTI0|Q7ZTI0_DANRE Sjogren syndrome antigen B (Autoantigen La) OS=Danio rerio GN=ssb PE=2 SV=1	1	18	45.4	0	645500000	783440000	445650000	NA	NA	23969000	1075200000	730330000	985350000	NA	57615000	NA
Q7ZTS8	Q7ZTS8	elavl1	>tr|Q7ZTS8|Q7ZTS8_DANRE ELAV (embryonic lethal, abnormal vision, Drosophila)-like 1 (Hu antigen R) OS=Danio rerio GN=elavl1 PE=2 SV=1	1	20	64.5	0	17800000000	16500000000	15000000000	2358200	3123700	4941100	20800000000	22800000000	23400000000	NA	219390000	NA
Q7ZU48	Q7ZU48	hnrnpa0l	>tr|Q7ZU48|Q7ZU48_DANRE Heterogeneous nuclear ribonucleoprotein A0, like OS=Danio rerio GN=hnrnpa0l PE=2 SV=2	1	14	49	0	3808900000	2472900000	2418700000	40844000	50446000	21148000	3530800000	5892300000	4850000000	NA	1130300000	629550000
Q7ZU62;B0R193;Q3B7P7;F1Q8K7;B0R189;F1R2W8;F1QHN6	Q7ZU62;B0R193;Q3B7P7;F1Q8K7;B0R189;F1R2W8;F1QHN6	rps27a;ubb;uba52;si:ch211-202a12.4;ubc	>tr|Q7ZU62|Q7ZU62_DANRE Ribosomal protein S27a (Fragment) OS=Danio rerio GN=rps27a PE=2 SV=1;>tr|B0R193|B0R193_DANRE Novel protein OS=Danio rerio GN=ubb PE=4 SV=1;>tr|Q3B7P7|Q3B7P7_DANRE Ubiquitin A-52 residue ribosomal protein fusion product 1 OS=Danio re	7	8	45.3	0	4284400000	3890000000	964240000	1042100000	1580200000	1769200000	6110900000	13100000000	9233200000	100720000	731320000	1310000000
Q7ZV05;A9C3W5	Q7ZV05;A9C3W5	rps11;si:dkey-159f12.2	>tr|Q7ZV05|Q7ZV05_DANRE Ribosomal protein S11 OS=Danio rerio GN=rps11 PE=2 SV=1;>tr|A9C3W5|A9C3W5_DANRE Novel protein similar to ribosomal protein S11 (Rps11) (Fragment) OS=Danio rerio GN=si:dkey-159f12.2 PE=4 SV=1	2	10	48.4	3.19e-22	148950000	116490000	144230000	NA	NA	NA	364320000	287160000	363900000	NA	NA	NA
Q7ZV82	Q7ZV82	rpl27	>sp|Q7ZV82|RL27_DANRE 60S ribosomal protein L27 OS=Danio rerio GN=rpl27 PE=2 SV=3	1	4	27.2	1.82e-08	NA	NA	89148000	NA	NA	NA	113400000	NA	106490000	NA	NA	NA
Q7ZVK5;E9QJ25	Q7ZVK5	pcbp2	>tr|Q7ZVK5|Q7ZVK5_DANRE Pcbp2 protein OS=Danio rerio GN=pcbp2 PE=2 SV=1	2	7	29.9	5.62e-59	62623000	51883000	45262000	NA	NA	NA	142070000	111570000	139350000	NA	NA	NA
Q7ZVM6;E9QEY1	Q7ZVM6	tia1l	>tr|Q7ZVM6|Q7ZVM6_DANRE Cytotoxic granule-associated RNA binding protein 1, like OS=Danio rerio GN=tia1l PE=2 SV=1	2	11	39.2	8.17e-298	1439400000	710210000	533760000	50282000	78536000	48389000	939470000	521270000	537600000	NA	NA	NA
Q7ZVY0	Q7ZVY0	tia1	>tr|Q7ZVY0|Q7ZVY0_DANRE Cytotoxic granule-associated RNA binding protein 1 OS=Danio rerio GN=tia1 PE=2 SV=1	1	13	44	0	6080000000	4939700000	3818300000	121350000	462610000	36718000	2576700000	3296300000	4051200000	NA	529630000	NA
Q7ZW09;F1QMR5	Q7ZW09	hnrpl	>tr|Q7ZW09|Q7ZW09_DANRE Heterogeneous nuclear ribonucleoprotein L OS=Danio rerio GN=hnrpl PE=2 SV=1	2	15	35.3	2.04e-150	170410000	124290000	143010000	NA	NA	NA	674570000	325770000	687170000	NA	NA	NA
Q7ZW95	Q7ZW95	rpl4	>tr|Q7ZW95|Q7ZW95_DANRE Ribosomal protein L4 OS=Danio rerio GN=rpl4 PE=2 SV=1	1	14	40	5.65e-56	234540000	276870000	262310000	NA	NA	NA	756740000	535240000	370280000	NA	NA	NA
Q7ZWA3;E9QBG3;Q7ZWA3-2;F8W5K3	Q7ZWA3;E9QBG3;Q7ZWA3-2;F8W5K3	rbmx	>sp|Q7ZWA3|RBMX_DANRE RNA-binding motif protein, X chromosome OS=Danio rerio GN=rbmx PE=2 SV=1;>tr|E9QBG3|E9QBG3_DANRE RNA-binding motif protein, X-linked OS=Danio rerio GN=rbmx PE=4 SV=1;>sp|Q7ZWA3-2|RBMX_DANRE Isoform 2 of RNA-binding motif protein, X ch	4	10	29.6	5.74e-40	174080000	168830000	196480000	NA	NA	NA	257800000	157010000	254660000	NA	NA	NA
Q7ZWJ4;F8W484	Q7ZWJ4	rpl18a	>sp|Q7ZWJ4|RL18A_DANRE 60S ribosomal protein L18a OS=Danio rerio GN=rpl18a PE=2 SV=1	2	6	34.7	1.97e-54	118700000	189970000	219060000	NA	NA	NA	486120000	283200000	302920000	NA	NA	NA
Q7ZWJ7	Q7ZWJ7	rpl34	>sp|Q7ZWJ7|RL34_DANRE 60S ribosomal protein L34 OS=Danio rerio GN=rpl34 PE=2 SV=3	1	5	37.6	1.86e-11	105790000	120800000	237680000	NA	NA	NA	309830000	204940000	169580000	NA	NA	NA
Q800H6;F1QTW8	Q800H6	matr3l1.1	>tr|Q800H6|Q800H6_DANRE Matrin 3-like 1.2 OS=Danio rerio GN=matr3l1.1 PE=2 SV=2	2	17	18.1	1.11e-105	54956000	49709000	134940000	NA	NA	NA	166170000	157670000	252930000	NA	NA	NA
Q802C7	Q802C7	tardbp	>tr|Q802C7|Q802C7_DANRE TAR DNA binding protein OS=Danio rerio GN=tardbp PE=2 SV=1	1	18	51.5	0	2706600000	3041300000	1553600000	NA	NA	NA	2483300000	1752500000	2448100000	NA	NA	NA
Q802C9;A5WVT8;Q7ZU67;F1R166	Q802C9;A5WVT8;Q7ZU67;F1R166	eif4a1a;eif4a1b;eif4a2	>tr|Q802C9|Q802C9_DANRE Eukaryotic translation initiation factor 4A, isoform 1A OS=Danio rerio GN=eif4a1a PE=2 SV=1;>tr|A5WVT8|A5WVT8_DANRE Novel protein similar to vertebrate eukaryotic translation initiation factor 4A, isoform 2 (EIF4A2, zgc:63783) (Frag	4	6	17.5	1.02e-31	54986000	35000000	90804000	NA	NA	NA	34525000	58179000	70836000	NA	NA	NA
Q802Z0	Q802Z0	ythdf1	>tr|Q802Z0|Q802Z0_DANRE Novel protein similar to vertebrate YTH domain family, member (Zgc:55657) OS=Danio rerio GN=ythdf1 PE=2 SV=1	1	5	9.8	1.91e-21	NA	NA	NA	NA	NA	NA	NA	74351000	107410000	NA	NA	NA
Q803N5;Q6NYX2;E9QET0	Q803N5;Q6NYX2	tardbpl	>tr|Q803N5|Q803N5_DANRE TAR DNA binding protein, like OS=Danio rerio GN=tardbpl PE=2 SV=1;>tr|Q6NYX2|Q6NYX2_DANRE TAR DNA binding protein, like OS=Danio rerio GN=tardbpl PE=2 SV=1	3	18	71	0	1574500000	2630100000	2534500000	NA	298040000	240930000	2430300000	2548100000	3012300000	NA	159620000	NA
Q8AW82	Q8AW82	pa2g4a	>tr|Q8AW82|Q8AW82_DANRE Novel protein similar to human proliferation-associated 2G4 protein (PA2G4) OS=Danio rerio GN=pa2g4a PE=2 SV=1	1	6	17.3	2.13e-36	NA	NA	NA	NA	NA	NA	87512000	58771000	60242000	NA	NA	NA
Q8JGS9;E9QJF2;E9QHH6	Q8JGS9;E9QJF2	rps18	>sp|Q8JGS9|RS18_DANRE 40S ribosomal protein S18 OS=Danio rerio GN=rps18 PE=2 SV=1;>tr|E9QJF2|E9QJF2_DANRE Ribosomal protein S18 OS=Danio rerio GN=rps18 PE=3 SV=1	3	7	42.8	2.75e-27	177110000	164780000	350530000	NA	NA	NA	256910000	157550000	536070000	NA	NA	NA
Q8UVX0;Q8UVX0-2;F1QZQ2;E9QHH1	Q8UVX0	piwil1	>sp|Q8UVX0|PIWL1_DANRE Piwi-like protein 1 OS=Danio rerio GN=piwil1 PE=1 SV=1	4	11	14	2.94e-43	60390000	35383000	NA	NA	NA	NA	141490000	92153000	226020000	NA	NA	NA
Q9DFG8;E7EXK8;F1Q8N8	Q9DFG8;E7EXK8;F1Q8N8	mkrn2	>sp|Q9DFG8|MKRN2_DANRE Probable E3 ubiquitin-protein ligase makorin-2 OS=Danio rerio GN=mkrn2 PE=2 SV=2;>tr|E7EXK8|E7EXK8_DANRE Makorin, ring finger protein, 2 OS=Danio rerio GN=mkrn2 PE=4 SV=1;>tr|F1Q8N8|F1Q8N8_DANRE Makorin, ring finger protein, 2 OS=Dan	3	2	6.8	8.54e-05	NA	NA	NA	NA	NA	NA	NA	30568000	30326000	NA	NA	NA
Q9PTK4	Q9PTK4	hug	>tr|Q9PTK4|Q9PTK4_DANRE HuG OS=Danio rerio GN=hug PE=2 SV=1	1	17	66.1	0	2679100000	1670000000	2096200000	NA	NA	NA	1839200000	1886600000	2402500000	NA	NA	NA
Q9PU62;F1QFA4;F1QQ23;Q6P3H0;E7F3S4;F1RCP3;F1QH59	Q9PU62;F1QFA4	cth1	>tr|Q9PU62|Q9PU62_DANRE Cth1 OS=Danio rerio GN=cth1 PE=2 SV=1;>tr|F1QFA4|F1QFA4_DANRE Cth1 (Fragment) OS=Danio rerio GN=cth1 PE=4 SV=1	7	8	21.6	1.82e-63	203730000	153240000	89971000	NA	NA	NA	851190000	217660000	384720000	NA	NA	NA
Q9PW80;E9QJD2	Q9PW80	igf2bp3	>sp|Q9PW80|IF2B3_DANRE Insulin-like growth factor 2 mRNA-binding protein 3 OS=Danio rerio GN=igf2bp3 PE=1 SV=1	2	33	56.4	0	11900000000	10300000000	10300000000	93592000	373470000	321200000	19000000000	19500000000	22100000000	NA	1326300000	451650000

## Sheet: ST3_MZT mRNA-bound proteome
Supplemental Table S3. List of protein groups comprising the zebrafish MZT mRNA interactome and comparison with mammalian mRNA interactomes							# The list of proteins comprising the zebrafish MZT mRNA interactome. Majority of detected proteins, their respective gene names, representative gene names and representative Ensembl gene IDs are shown. Column "status" indicates contaminants and proteins considered as high confidence mRBPs (MZT mRNA interactome). Yellow, retired genes in the latest ensembl annotation (Zv10, v82). Proteins from th…
Majority.protein.IDs	Gene.names	Representative.Gene.Names	Representative.Ensembl.Gene.IDs. Zv9 (version 82)	preZGA	ZGA	status
F1QQQ3	vtg3	vtg3	ENSDARG00000016448	FALSE	TRUE	contaminant
F1QV15	vtg6	vtg6	ENSDARG00000016825	TRUE	TRUE	contaminant
Q1MTC4	vtg2	vtg2	ENSDARG00000055809	TRUE	TRUE	contaminant
F1R887;F1Q7L0;F1RBA0	vtg4	vtg4	ENSDARG00000078429	TRUE	TRUE	contaminant
F1QTW6;F1R2S5	vtg5	vtg5	ENSDARG00000092126	TRUE	TRUE	contaminant
Q1LWN2	vtg1	vtg1	ENSDARG00000092233	TRUE	TRUE	contaminant
Q1MTC6;F1R2T3	vtg7	vtg7	ENSDARG00000092419	TRUE	TRUE	contaminant
E7F2U7;F1QIH9;F1R9Z1	zgc:173556	zp3.2	ENSDARG00000090768	TRUE	FALSE	contaminant
F1QUS3;F1QQQ7;F1R003;F1QMZ0;F1QJ26;F1QNI8	zp2.5;zp2.2;zp2;zp2.3;zp2.6	zp2.5	ENSDARG00000086522	TRUE	FALSE	contaminant
Q5TYP2	zp3a.2	zp3a.2	ENSDARG00000042130	TRUE	FALSE	contaminant	Mammalian mRNA interactomes
Q5TYX2	si:dkeyp-50f7.2	si:dkeyp-50f7.2	ENSDARG00000069251	TRUE	FALSE	contaminant	mESC interactome	HeLa interactome	HEK293 interactome	Zebrafish GO terms_RNA-, mRNA-, poly(A) RNA-binding	Human orthologs GO terms_RNA-, mRNA-, poly(A) RNA-binding
Q800H6	matr3l1.1	matr3l1.1	ENSDARG00000000394	TRUE	TRUE	MZT mRNA interactome	FALSE	TRUE	TRUE	FALSE	TRUE
Q6TGY6;B8K0D5	pabpc1l	pabpc1l	ENSDARG00000002597	TRUE	TRUE	MZT mRNA interactome	FALSE	FALSE	FALSE	TRUE	TRUE
E7EY75;B8JLQ3;F1R6L6;E9QB18	ncl	ncl	ENSDARG00000002710	TRUE	TRUE	MZT mRNA interactome	TRUE	TRUE	TRUE	FALSE	TRUE
A9C3V8	igf2bp2a	igf2bp2a	ENSDARG00000003421	FALSE	TRUE	MZT mRNA interactome	TRUE	TRUE	TRUE	TRUE	TRUE
Q7SXN2	hnrpdl	hnrpdl	ENSDARG00000003429	TRUE	TRUE	MZT mRNA interactome	TRUE	TRUE	TRUE	FALSE	TRUE
Q6NY74	rpa1	rpa1	ENSDARG00000003938	FALSE	TRUE	MZT mRNA interactome	FALSE	FALSE	FALSE	FALSE	FALSE
Q803N5;Q6NYX2	tardbpl	tardbpl	ENSDARG00000004452	TRUE	TRUE	MZT mRNA interactome	TRUE	TRUE	TRUE	FALSE	TRUE
Q5RHQ7	hnrnpub	hnrnpub	ENSDARG00000004735	FALSE	TRUE	MZT mRNA interactome	FALSE	TRUE	TRUE	FALSE	TRUE
A1A605;F1RB19	ybx1	ybx1	ENSDARG00000004757	TRUE	TRUE	MZT mRNA interactome	TRUE	TRUE	TRUE	TRUE	TRUE
E7F304;Q9IBD0;F1R2H3;E9QIE8	celf1	celf1	ENSDARG00000005315	TRUE	TRUE	MZT mRNA interactome	TRUE	TRUE	TRUE	TRUE	TRUE
F1QFJ8	hnrnph1l	hnrnph1l	ENSDARG00000005551	TRUE	TRUE	MZT mRNA interactome	TRUE	TRUE	TRUE	FALSE	TRUE
F1RCB2	pl10	ddx3b	ENSDARG00000005774	TRUE	TRUE	MZT mRNA interactome	TRUE	TRUE	TRUE	FALSE	TRUE
F1QFV6	rpl28	rpl28	ENSDARG00000005791	FALSE	TRUE	MZT mRNA interactome	FALSE	TRUE	FALSE	TRUE	TRUE
B8JL46;F1R101	zgc:158450	EIF4G1 (1 of 3)	ENSDARG00000006200	TRUE	TRUE	MZT mRNA interactome	TRUE	TRUE	TRUE	TRUE	TRUE
Q6P111;F1Q8I5	lsm14aa	lsm14aa	ENSDARG00000006600	TRUE	TRUE	MZT mRNA interactome	TRUE	TRUE	TRUE	FALSE	TRUE
F1QXG4;Q5RGK8;Q7ZT42;Q7ZT42-2;Q7ZT42-3	snd1	snd1	ENSDARG00000006766	TRUE	TRUE	MZT mRNA interactome	TRUE	TRUE	TRUE	FALSE	TRUE
Q6Q417	rpl7	rpl7	ENSDARG00000007320	FALSE	TRUE	MZT mRNA interactome	FALSE	TRUE	TRUE	TRUE	TRUE
Q9DFG8;E7EXK8;F1Q8N8	mkrn2	mkrn2	ENSDARG00000007630	FALSE	TRUE	MZT mRNA interactome	FALSE	FALSE	TRUE	FALSE	TRUE
Q6NYU8;F8W4E3;F8W5P8;F8W2Z3	hnrnpab	hnrnpab	ENSDARG00000007960	TRUE	TRUE	MZT mRNA interactome	TRUE	TRUE	TRUE	FALSE	TRUE
F1QVC6	srsf9	srsf9	ENSDARG00000008097	TRUE	TRUE	MZT mRNA interactome	TRUE	TRUE	TRUE	FALSE	TRUE
Q9YGX5;E9QB15	cpeb1;cpeb1b	cpeb1b	ENSDARG00000008454	TRUE	TRUE	MZT mRNA interactome	FALSE	FALSE	FALSE	TRUE	TRUE
F1QIJ0;E7FDQ5	caprin1a	caprin1a	ENSDARG00000009346	FALSE	TRUE	MZT mRNA interactome	TRUE	TRUE	TRUE	FALSE	TRUE
F1RCD8;F1QTT5;F1RD28;E9QG77;E9QIA1	zgc:66313;zgc:92137	zgc:92137	ENSDARG00000009443	FALSE	TRUE	MZT mRNA interactome	FALSE	FALSE	FALSE	FALSE	FALSE
E9QJJ0;Q7SXQ1	tial1	tial1	ENSDARG00000009525	TRUE	TRUE	MZT mRNA interactome	TRUE	TRUE	TRUE	TRUE	TRUE
F1R9Y8;E7F9M4;F1QB10	hdlbp	hdlbp	ENSDARG00000009830	TRUE	TRUE	MZT mRNA interactome	TRUE	TRUE	TRUE	TRUE	TRUE
Q6PBY3	edf1	edf1	ENSDARG00000009950	TRUE	TRUE	MZT mRNA interactome	TRUE	TRUE	TRUE	FALSE	TRUE
F1R183;F1Q8G3	eif4bb	eif4bb	ENSDARG00000010194	TRUE	TRUE	MZT mRNA interactome	TRUE	TRUE	TRUE	FALSE	TRUE
Q9PW80	igf2bp3	igf2bp3	ENSDARG00000010266	TRUE	TRUE	MZT mRNA interactome	TRUE	TRUE	TRUE	TRUE	TRUE
E7FAQ8;E7FAB3	zgc:66127	hnrnpa1a	ENSDARG00000011020	TRUE	TRUE	MZT mRNA interactome	TRUE	TRUE	TRUE	FALSE	TRUE
Q1L8R2	sfpq	sfpq	ENSDARG00000011564	TRUE	TRUE	MZT mRNA interactome	TRUE	TRUE	TRUE	TRUE	TRUE
F1QSX5;F1QA42	atxn2l	atxn2l	ENSDARG00000011597	TRUE	TRUE	MZT mRNA interactome	FALSE	TRUE	TRUE	TRUE	TRUE
Q6P022;F1QVD2;E7F8Y4	u2af2b;u2af2a	u2af2b	ENSDARG00000011740	FALSE	TRUE	MZT mRNA interactome	TRUE	TRUE	TRUE	TRUE	TRUE
Q6P5L3	rpl19	rpl19	ENSDARG00000013307	FALSE	TRUE	MZT mRNA interactome	TRUE	TRUE	FALSE	TRUE	TRUE
F1R6L3;E7EYX7	cirbp	cirbpb	ENSDARG00000013351	TRUE	TRUE	MZT mRNA interactome	TRUE	TRUE	TRUE	FALSE	TRUE
A8DZG2;F1QNA5;E7FFF7	srsf6b;srsf6a	srsf6a	ENSDARG00000013729	FALSE	TRUE	MZT mRNA interactome	TRUE	TRUE	TRUE	TRUE	TRUE
Q7ZWA3;E9QBG3;Q7ZWA3-2;F8W5K3	rbmx	rbmx	ENSDARG00000014244	TRUE	TRUE	MZT mRNA interactome	TRUE	TRUE	TRUE	TRUE	TRUE
E7F1H9	yth2	ythdf2	ENSDARG00000014498	FALSE	TRUE	MZT mRNA interactome	TRUE	TRUE	TRUE	FALSE	TRUE
Q7SZC9	hnrnpr	hnrnpr	ENSDARG00000014569	TRUE	TRUE	MZT mRNA interactome	TRUE	TRUE	TRUE	TRUE	TRUE
Q6NZ06	ilf2	ilf2	ENSDARG00000014591	TRUE	TRUE	MZT mRNA interactome	TRUE	TRUE	TRUE	TRUE	TRUE
Q642H9	rps4x	rps4x	ENSDARG00000014690	TRUE	TRUE	MZT mRNA interactome	TRUE	TRUE	TRUE	TRUE	TRUE
Q6P0V6	rpl8	rpl8	ENSDARG00000014867	TRUE	TRUE	MZT mRNA interactome	TRUE	TRUE	TRUE	TRUE	TRUE
Q7ZV82	rpl27	rpl27	ENSDARG00000015128	FALSE	TRUE	MZT mRNA interactome	TRUE	TRUE	TRUE	TRUE	TRUE
E7F3J2	hnrnpua	hnrnpua	ENSDARG00000015206	TRUE	TRUE	MZT mRNA interactome	FALSE	TRUE	TRUE	FALSE	TRUE
E7FAV9	mov10a	mov10a	ENSDARG00000015829	TRUE	TRUE	MZT mRNA interactome	TRUE	TRUE	TRUE	FALSE	TRUE
E7FDR0	eif4enif1	eif4enif1	ENSDARG00000016177	TRUE	TRUE	MZT mRNA interactome	TRUE	FALSE	TRUE	FALSE	TRUE
E9QG02;F1RC77	fxr2	fxr2	ENSDARG00000016260	FALSE	TRUE	MZT mRNA interactome	TRUE	TRUE	TRUE	TRUE	TRUE
F1RCY6	upf1	upf1	ENSDARG00000016302	TRUE	TRUE	MZT mRNA interactome	TRUE	TRUE	TRUE	FALSE	TRUE
F1QRD4;Q66HY6	ncoa5	ncoa5	ENSDARG00000016345	TRUE	TRUE	MZT mRNA interactome	FALSE	FALSE	TRUE	FALSE	TRUE
Q6PFQ2;F1QUG5;E7F475	eif3c	eif3c	ENSDARG00000016443	TRUE	TRUE	MZT mRNA interactome	TRUE	TRUE	TRUE	TRUE	TRUE
Q802Z0	ythdf1	ythdf1	ENSDARG00000016447	FALSE	TRUE	MZT mRNA interactome	FALSE	TRUE	TRUE	FALSE	TRUE
Q6DRC4	eif3g	eif3g	ENSDARG00000016889	TRUE	TRUE	MZT mRNA interactome	TRUE	TRUE	TRUE	TRUE	TRUE
F1QB54	pabpc1a	pabpc1a	ENSDARG00000017219	TRUE	TRUE	MZT mRNA interactome	TRUE	TRUE	TRUE	TRUE	TRUE
Q6P124;F1QJB8	g3bp1	g3bp1	ENSDARG00000017741	TRUE	TRUE	MZT mRNA interactome	TRUE	TRUE	TRUE	FALSE	TRUE
F1QKQ4;B8JMA9;F1QJZ5	wdr33	wdr33	ENSDARG00000018272	TRUE	TRUE	MZT mRNA interactome	FALSE	FALSE	TRUE	TRUE	TRUE
E7F1G8	wu:fk48d07	si:ch211-175g6.7	ENSDARG00000018425	TRUE	TRUE	MZT mRNA interactome	no homolog	no homolog	no homolog	TRUE
Q6NWC6;Q6NWC6-2	cpsf6	cpsf6	ENSDARG00000018618	TRUE	TRUE	MZT mRNA interactome	TRUE	TRUE	TRUE	TRUE	TRUE
Q7ZVR8;G1K2G8;Q7ZVR8-2;G1K2P5	esrp2	esrp2	ENSDARG00000018814	TRUE	TRUE	MZT mRNA interactome	TRUE	TRUE	TRUE	TRUE	TRUE
F1QWB4;B0UXJ3	hnrnpk	hnrnpk	ENSDARG00000018914	TRUE	TRUE	MZT mRNA interactome	TRUE	TRUE	TRUE	TRUE	TRUE
E9QJ40;E7F1Z6	fam120c	fam120c	ENSDARG00000019205	FALSE	TRUE	MZT mRNA interactome	FALSE	TRUE	TRUE	FALSE	TRUE
Q6PBZ1	rpl7a	rpl7a	ENSDARG00000019230	TRUE	TRUE	MZT mRNA interactome	FALSE	TRUE	TRUE	FALSE	TRUE
Q503D3	ptbp1a	ptbp1a	ENSDARG00000019362	TRUE	TRUE	MZT mRNA interactome	TRUE	TRUE	TRUE	TRUE	TRUE
Q6DHL6	rps6	rps6	ENSDARG00000019778	TRUE	TRUE	MZT mRNA interactome	TRUE	TRUE	FALSE	FALSE	TRUE
Q9PTK4	hug	hug	ENSDARG00000019941	TRUE	TRUE	MZT mRNA interactome	FALSE	FALSE	FALSE	TRUE	TRUE
F1Q949	cpsf4	cpsf4	ENSDARG00000020217	TRUE	TRUE	MZT mRNA interactome	FALSE	FALSE	TRUE	FALSE	TRUE
Q803E3;Q4QRG0	ewsr1b	ewsr1b	ENSDARG00000020465	TRUE	TRUE	MZT mRNA interactome	TRUE	TRUE	TRUE	FALSE	TRUE
Q1LV81;F1QB05;F1QVW3	safb	safb	ENSDARG00000020467	FALSE	TRUE	MZT mRNA interactome	TRUE	TRUE	TRUE	FALSE	TRUE
B0S6P6	ddx3	ddx3a	ENSDARG00000020573	TRUE	TRUE	MZT mRNA interactome	FALSE	TRUE	TRUE	FALSE	TRUE
Q6TH15	eif3d	eif3d	ENSDARG00000021257	FALSE	TRUE	MZT mRNA interactome	TRUE	TRUE	TRUE	FALSE	TRUE
Q6NXC1	rbm4.3	rbm4.3	ENSDARG00000022129	TRUE	TRUE	MZT mRNA interactome	TRUE	TRUE	TRUE	FALSE	TRUE
Q4VBV2	rps27.1	rps27.1	ENSDARG00000023298	FALSE	TRUE	MZT mRNA interactome	no homolog	no homolog	no homolog	TRUE
Q7ZWJ4	rpl18a	rpl18a	ENSDARG00000025073	TRUE	TRUE	MZT mRNA interactome	TRUE	TRUE	TRUE	TRUE	TRUE
B0R085;B0R086	zgc:103482	HABP4	ENSDARG00000025174	TRUE	TRUE	MZT mRNA interactome	FALSE	FALSE	FALSE	FALSE	FALSE
F1Q898	lsm14b	lsm14b	ENSDARG00000025386	TRUE	TRUE	MZT mRNA interactome	TRUE	FALSE	TRUE	FALSE	TRUE
Q6NYG6;F1RDB0	tdrd3	tdrd3	ENSDARG00000025421	TRUE	TRUE	MZT mRNA interactome	FALSE	TRUE	TRUE	TRUE	TRUE
E9QIR9;Q7ZV96	rpl10	rpl10	ENSDARG00000025581	FALSE	TRUE	MZT mRNA interactome	FALSE	TRUE	TRUE	TRUE	TRUE
Q7ZVM6	tia1l	tia1l	ENSDARG00000026476	TRUE	TRUE	MZT mRNA interactome	TRUE	TRUE	TRUE	FALSE	TRUE
F1QXP8	khsrp	khsrp	ENSDARG00000026489	TRUE	TRUE	MZT mRNA interactome	TRUE	TRUE	TRUE	TRUE	TRUE
F1R8D7	syncripl	syncripl	ENSDARG00000026723	TRUE	TRUE	MZT mRNA interactome	TRUE	TRUE	TRUE	FALSE	TRUE
Q7ZW47;F1QJT6	stau2	stau2	ENSDARG00000026801	TRUE	TRUE	MZT mRNA interactome	FALSE	TRUE	TRUE	TRUE	TRUE
A9C4A6	mkrn4	mkrn4	ENSDARG00000028295	FALSE	TRUE	MZT mRNA interactome	no homolog	no homolog	no homolog	FALSE	FALSE
Q6P2A9	fubp1	fubp1	ENSDARG00000029248	TRUE	TRUE	MZT mRNA interactome	TRUE	TRUE	TRUE	TRUE	TRUE
Q7ZTI0	ssb	ssb	ENSDARG00000029252	TRUE	TRUE	MZT mRNA interactome	TRUE	TRUE	TRUE	TRUE	TRUE
Q7ZWJ7	rpl34	rpl34	ENSDARG00000029500	TRUE	TRUE	MZT mRNA interactome	FALSE	FALSE	FALSE	TRUE	TRUE
E9QF69;F1QN76;Q6DGL0	rpl18	rpl18	ENSDARG00000029533	FALSE	TRUE	MZT mRNA interactome	FALSE	FALSE	FALSE	TRUE	TRUE
Q6TGT9	srsf5a	srsf5a	ENSDARG00000029818	FALSE	TRUE	MZT mRNA interactome	no homolog	no homolog	no homolog	FALSE
F1QHJ1	rps26l	rps26l	ENSDARG00000030408	TRUE	TRUE	MZT mRNA interactome	TRUE	TRUE	TRUE	TRUE	TRUE
E9QC91;E7F9N3	prrc2a	prrc2a	ENSDARG00000031494	FALSE	TRUE	MZT mRNA interactome	FALSE	FALSE	TRUE	FALSE	TRUE
Q7ZU62;B0R193;Q3B7P7;F1Q8K7;B0R189;F1R2W8;F1QHN6	rps27a;ubb;uba52;si:ch211-202a12.4;ubc	rps27a	ENSDARG00000032725	FALSE	TRUE	MZT mRNA interactome	FALSE	TRUE	TRUE	FALSE	TRUE
F1Q5V2;F1QSY3	api5	api5	ENSDARG00000033597	FALSE	TRUE	MZT mRNA interactome	TRUE	TRUE	TRUE	FALSE	TRUE
Q7ZW09	hnrpl	hnrpl	ENSDARG00000035324	TRUE	TRUE	MZT mRNA interactome	TRUE	TRUE	TRUE	TRUE	TRUE
A2BHA7;A2BHA8;A2BHA9;A2BHB0;A2BHB2;Q6P0K2;A2BHA6	srsf7a	srsf7a	ENSDARG00000035325	TRUE	TRUE	MZT mRNA interactome	no homolog	no homolog	no homolog	FALSE
Q6PBY1	rps3a	rps3a	ENSDARG00000035692	TRUE	TRUE	MZT mRNA interactome	TRUE	TRUE	TRUE	FALSE	TRUE
Q6PBK3	rps28	rps28	ENSDARG00000035860	TRUE	TRUE	MZT mRNA interactome	FALSE	TRUE	TRUE	FALSE	TRUE
Q7ZU48	hnrnpa0l	hnrnpa0l	ENSDARG00000036161	TRUE	TRUE	MZT mRNA interactome	TRUE	TRUE	TRUE	FALSE	TRUE
F1QTL9;F8W265	hnrnpa0b	hnrnpa0b	ENSDARG00000036162	TRUE	TRUE	MZT mRNA interactome	TRUE	TRUE	TRUE	FALSE	TRUE
Q1LUN5;Q9YGW7;Q1LUN6	dazl	dazl	ENSDARG00000036214	TRUE	TRUE	MZT mRNA interactome	TRUE	FALSE	FALSE	TRUE	TRUE
Q6IQ97	rbm4.1	rbm4.1	ENSDARG00000036386	FALSE	TRUE	MZT mRNA interactome	TRUE	TRUE	TRUE	TRUE	TRUE
Q6PBW3	rps14	rps14	ENSDARG00000036629	TRUE	TRUE	MZT mRNA interactome	TRUE	FALSE	TRUE	FALSE	TRUE
F1QFV2	hnrnpa1	hnrnpa1b	ENSDARG00000036675	TRUE	TRUE	MZT mRNA interactome	TRUE	TRUE	TRUE	FALSE	TRUE
E7EYA6;F1Q664;F1Q663	fmr1	fmr1	ENSDARG00000037433	TRUE	TRUE	MZT mRNA interactome	TRUE	TRUE	TRUE	TRUE	TRUE
Q6NWH7;F1RBJ8;F1Q5L6;B0JZJ1	ddx5	ddx5	ENSDARG00000038068	TRUE	TRUE	MZT mRNA interactome	TRUE	TRUE	TRUE	FALSE	TRUE
Q7ZTS8	elavl1	elavl1	ENSDARG00000038695	TRUE	TRUE	MZT mRNA interactome	TRUE	TRUE	TRUE	TRUE	TRUE
B8JL34;F1QMD2;F1QSU8	zgc:123010	zgc:123010	ENSDARG00000039082	FALSE	TRUE	MZT mRNA interactome	no homolog	no homolog	no homolog	TRUE
Q642J7;B7ZD34;B7ZD32	rps24	rps24	ENSDARG00000039347	TRUE	TRUE	MZT mRNA interactome	TRUE	TRUE	TRUE	FALSE	TRUE
B8A5I7	ssbp1	ssbp1	ENSDARG00000039350	FALSE	TRUE	MZT mRNA interactome	FALSE	TRUE	TRUE	FALSE	TRUE
Q8AW82	pa2g4a	pa2g4a	ENSDARG00000039578	FALSE	TRUE	MZT mRNA interactome	TRUE	TRUE	FALSE	FALSE	TRUE
Q802C7	tardbp	tardbp	ENSDARG00000040031	TRUE	TRUE	MZT mRNA interactome	TRUE	TRUE	TRUE	FALSE	TRUE
Q6NUZ3;F1QY96;F6NN54	syncrip	syncrip	ENSDARG00000040184	TRUE	TRUE	MZT mRNA interactome	TRUE	TRUE	TRUE	FALSE	TRUE
Q1MT19;Q6GQM6;F1QLQ7	elavl2	elavl2	ENSDARG00000040732	TRUE	TRUE	MZT mRNA interactome	TRUE	TRUE	TRUE	TRUE	TRUE
Q6P0V0	hnrnph1	hnrnph1	ENSDARG00000040881	TRUE	TRUE	MZT mRNA interactome	TRUE	TRUE	TRUE	FALSE	TRUE
Q7ZW95	rpl4	rpl4	ENSDARG00000041182	TRUE	TRUE	MZT mRNA interactome	FALSE	TRUE	TRUE	TRUE	TRUE
Q8UVX0	piwil1	piwil1	ENSDARG00000041699	TRUE	TRUE	MZT mRNA interactome	FALSE	FALSE	FALSE	TRUE	TRUE
F1QQ28	eif4h	eif4h	ENSDARG00000042252	TRUE	TRUE	MZT mRNA interactome	TRUE	TRUE	TRUE	FALSE	TRUE
Q1LUY0	parp12a	parp12a	ENSDARG00000042496	FALSE	TRUE	MZT mRNA interactome	FALSE	FALSE	FALSE	FALSE	TRUE
Q6PC80	rps5	rps5	ENSDARG00000043453	FALSE	TRUE	MZT mRNA interactome	TRUE	TRUE	TRUE	TRUE	TRUE
F5H8N4;F1QWU3	lrpprc	lrpprc	ENSDARG00000043970	TRUE	TRUE	MZT mRNA interactome	TRUE	TRUE	TRUE	FALSE	TRUE
Q6P0G2	zgc:77262	zgc:77262	ENSDARG00000044545	TRUE	TRUE	MZT mRNA interactome	no homolog	no homolog	no homolog	FALSE
F8W5X1;E9QGV8;A7YYD9;E7FGA2;Q6NUT4	pabpn1	pabpn1	ENSDARG00000045373	FALSE	TRUE	MZT mRNA interactome	TRUE	TRUE	TRUE	FALSE	TRUE
F1Q6Z5;E9QBN6	cnbpa	cnbpa	ENSDARG00000045776	TRUE	TRUE	MZT mRNA interactome	TRUE	TRUE	TRUE	TRUE	TRUE
F1QZC1	rbfox2	rbfox2	ENSDARG00000052182	TRUE	TRUE	MZT mRNA interactome	TRUE	TRUE	TRUE	FALSE	TRUE
Q7ZVY0	tia1	tia1	ENSDARG00000052536	TRUE	TRUE	MZT mRNA interactome	TRUE	TRUE	TRUE	FALSE	TRUE
E7FAA3;F1QZW2;F1Q561	raver1	raver1	ENSDARG00000052617	FALSE	TRUE	MZT mRNA interactome	TRUE	TRUE	TRUE	FALSE	TRUE
A2CE73;Q6NW56	khdrbs1a	khdrbs1a	ENSDARG00000052856	TRUE	TRUE	MZT mRNA interactome	TRUE	TRUE	TRUE	TRUE	TRUE
A2CF31	atxn2	atxn2	ENSDARG00000052897	FALSE	TRUE	MZT mRNA interactome	TRUE	TRUE	TRUE	TRUE	TRUE
Q24JV3	rpl31	rpl31	ENSDARG00000053365	FALSE	TRUE	MZT mRNA interactome	FALSE	TRUE	TRUE	TRUE	TRUE
Q6PC14	rpl23	rpl23	ENSDARG00000053457	FALSE	TRUE	MZT mRNA interactome	TRUE	TRUE	FALSE	TRUE	TRUE
F1QLU3;F1QRS6;Q803J4;F1RCV7;E9QCG8	hnrnpc	hnrnpc	ENSDARG00000053810	TRUE	TRUE	MZT mRNA interactome	TRUE	TRUE	TRUE	FALSE	TRUE
A5WVQ1	caprin1b	caprin1b	ENSDARG00000054272	TRUE	TRUE	MZT mRNA interactome	TRUE	TRUE	TRUE	FALSE	TRUE
F1Q7F8	rbm4.2	rbm4.2	ENSDARG00000055080	TRUE	TRUE	MZT mRNA interactome	TRUE	TRUE	TRUE	FALSE	TRUE
E7F4T4	zc3h7b	zc3h7b	ENSDARG00000055930	TRUE	TRUE	MZT mRNA interactome	FALSE	TRUE	TRUE	FALSE	TRUE
E7F3N2	zar1l	zar1l	ENSDARG00000055973	TRUE	TRUE	MZT mRNA interactome	FALSE	FALSE	FALSE	FALSE	FALSE
P62247	rps8	rps8a	ENSDARG00000055996	TRUE	TRUE	MZT mRNA interactome	TRUE	TRUE	TRUE	FALSE	TRUE
Q9PU62;F1QFA4	cth1	cth1	ENSDARG00000057328	TRUE	TRUE	MZT mRNA interactome	no homolog	no homolog	no homolog	FALSE
E9QHD6;Q7ZV13;Q6NZT9	srsf2a;srsf2b	srsf2a	ENSDARG00000057484	FALSE	TRUE	MZT mRNA interactome	TRUE	TRUE	FALSE	TRUE	TRUE
F1QCP1;F1R9E5	prrc2c	prrc2c	ENSDARG00000057583	FALSE	TRUE	MZT mRNA interactome	FALSE	TRUE	TRUE	FALSE	TRUE
Q7SXP4;E9QGF8;Q6NYA0;F1QXQ1;F1RBL9;F1RCS7	srsf1a;srsf1b	srsf1b	ENSDARG00000017843	TRUE	TRUE	MZT mRNA interactome	TRUE	TRUE	TRUE	TRUE	TRUE
E7FAP0	ythdf3	ythdf3	ENSDARG00000057939	FALSE	TRUE	MZT mRNA interactome	TRUE	TRUE	TRUE	FALSE	TRUE
Q567N5	rpl6	rpl6	ENSDARG00000058451	TRUE	TRUE	MZT mRNA interactome	TRUE	TRUE	FALSE	TRUE	TRUE
F1QZW7	ilf3a	ilf3a	ENSDARG00000058660	TRUE	TRUE	MZT mRNA interactome	no homolog	no homolog	no homolog	TRUE
B7ZVC7;F1Q758;E9QB16	rbm38	rbm38	ENSDARG00000058818	TRUE	TRUE	MZT mRNA interactome	TRUE	TRUE	TRUE	FALSE	TRUE
F1Q8A5	hnrnpd	hnrnpd	ENSDARG00000059246	TRUE	TRUE	MZT mRNA interactome	TRUE	TRUE	TRUE	FALSE	TRUE
F1Q577;A8KC22;F1RC33	hnrnpl2	hnrnpl2	ENSDARG00000059303	TRUE	TRUE	MZT mRNA interactome	TRUE	TRUE	TRUE	TRUE	TRUE
A5WWG5;A5WWG4	srsf3b	srsf3b	ENSDARG00000059360	TRUE	TRUE	MZT mRNA interactome	TRUE	TRUE	TRUE	FALSE	TRUE
B0V3S8;F1QRQ0;E7EZM9;B0V3S9	myef2	myef2	ENSDARG00000059398	TRUE	TRUE	MZT mRNA interactome	TRUE	FALSE	TRUE	FALSE	TRUE
A2RUY5	zgc:158399	ubap2b	ENSDARG00000060065	FALSE	TRUE	MZT mRNA interactome	TRUE	TRUE	FALSE	FALSE	TRUE
F1R368	wu:fc56b07	gtpbp6	ENSDARG00000061091	TRUE	TRUE	MZT mRNA interactome	FALSE	FALSE	FALSE	FALSE	FALSE
F1Q931	larp1b	larp1b	ENSDARG00000061169	TRUE	TRUE	MZT mRNA interactome	no homolog	no homolog	no homolog	FALSE
E7FD91	ddx6	ddx6	ENSDARG00000061338	TRUE	TRUE	MZT mRNA interactome	TRUE	TRUE	TRUE	FALSE	TRUE
F1R2E0;E9QEE4	hnrnpm	hnrnpm	ENSDARG00000061735	TRUE	TRUE	MZT mRNA interactome	TRUE	TRUE	TRUE	TRUE	TRUE
F1Q7F1;A5PMI5	papd7	papd7	ENSDARG00000062114	TRUE	TRUE	MZT mRNA interactome	FALSE	FALSE	FALSE	FALSE	FALSE
F1R6P0	mrps5	mrps5	ENSDARG00000062209	FALSE	TRUE	MZT mRNA interactome	TRUE	TRUE	TRUE	TRUE	TRUE
F1QQ31;B0UYI3	mrpl37	mrpl37	ENSDARG00000062916	TRUE	TRUE	MZT mRNA interactome	FALSE	TRUE	FALSE	TRUE	TRUE
Q1L8T3;Q1L8T2	ubap2l	ubap2l	ENSDARG00000063219	FALSE	TRUE	MZT mRNA interactome	TRUE	TRUE	TRUE	FALSE	TRUE
B0S522;F1QI07	rbm45	rbm45	ENSDARG00000063731	FALSE	TRUE	MZT mRNA interactome	TRUE	TRUE	TRUE	FALSE	TRUE
F1QKB8	si:dkey-24l11.3	si:dkey-24l11.2	ENSDARG00000068140	TRUE	TRUE	MZT mRNA interactome	no homolog	no homolog	no homolog	FALSE
A2BFY7	purba	purba	ENSDARG00000068822	FALSE	TRUE	MZT mRNA interactome	TRUE	TRUE	TRUE	FALSE	TRUE
A1A5X7	zgc:158363	taf15	ENSDARG00000070019	TRUE	TRUE	MZT mRNA interactome	TRUE	TRUE	TRUE	FALSE	TRUE
F1QG80	rpl22	rpl22	ENSDARG00000070437	TRUE	TRUE	MZT mRNA interactome	TRUE	TRUE	TRUE	TRUE	TRUE
Q6NW62	khdrbs1b	khdrbs1b	ENSDARG00000070475	TRUE	TRUE	MZT mRNA interactome	TRUE	TRUE	TRUE	TRUE	TRUE
E7FCQ0	cnbpb	cnbpb	ENSDARG00000070922	FALSE	TRUE	MZT mRNA interactome	TRUE	TRUE	TRUE	FALSE	TRUE
F1Q618	si:ch1073-335m2.2	SPEN (2 of 2)	ENSDARG00000074332	FALSE	TRUE	MZT mRNA interactome	FALSE	TRUE	TRUE	FALSE	TRUE
F1QJ44;F1QAW2;F1QSJ7	zgc:56304	G3BP2 (2 of 2)	ENSDARG00000074572	TRUE	TRUE	MZT mRNA interactome	TRUE	TRUE	TRUE	FALSE	TRUE
E9QFH8;E7F3H9	csde1	csde1	ENSDARG00000074758	TRUE	TRUE	MZT mRNA interactome	TRUE	TRUE	TRUE	FALSE	TRUE
E7F3K7	tbrg4	tbrg4	ENSDARG00000074807	TRUE	TRUE	MZT mRNA interactome	TRUE	TRUE	TRUE	FALSE	TRUE
E7FEW2	LOC563801	mtpap	ENSDARG00000076155	FALSE	TRUE	MZT mRNA interactome	TRUE	TRUE	TRUE	FALSE	TRUE
F1RED5;E7FEK4;E7F3L3;E7FFZ3	si:dkey-46g23.3;si:dkey-46g23.2	A2ML1 (7 of 13)	ENSDARG00000076366	FALSE	TRUE	MZT mRNA interactome	FALSE	FALSE	FALSE	FALSE	FALSE
Q6PCR7	eif3a	eif3a	ENSDARG00000076815	TRUE	TRUE	MZT mRNA interactome	TRUE	TRUE	TRUE	FALSE	TRUE
B0S618	fastk	fastk	ENSDARG00000077075	FALSE	TRUE	MZT mRNA interactome	FALSE	FALSE	FALSE	FALSE	FALSE
Q6NWC3	rps2	rps2	ENSDARG00000077291	TRUE	TRUE	MZT mRNA interactome	TRUE	FALSE	TRUE	TRUE	TRUE
F1Q9D1	alyref	alyref	ENSDARG00000077732	TRUE	TRUE	MZT mRNA interactome	TRUE	TRUE	TRUE	FALSE	TRUE
B0S6Z1	dhx9	dhx9	ENSDARG00000079725	TRUE	TRUE	MZT mRNA interactome	TRUE	TRUE	TRUE	TRUE	TRUE
A8KB68;F1QA36	si:ch211-226h8.13;si:ch211-154a22.8	si:ch211-154a22.8	ENSDARG00000087583	FALSE	TRUE	MZT mRNA interactome	no homolog	no homolog	no homolog	FALSE
E7EYA8	CABZ01073334.1	FUBP3	ENSDARG00000086896	TRUE	TRUE	MZT mRNA interactome	TRUE	TRUE	TRUE	TRUE	TRUE
F1QZN1;F1QED0	fubp3	fubp3		TRUE	TRUE	gene retired
F1QS28	hnrnpa0a	hnrnpa0a	ENSDARG00000089302	TRUE	TRUE	MZT mRNA interactome	TRUE	TRUE	TRUE	FALSE	TRUE
E7FAC4	si:ch211-103b1.2	PATL2	ENSDARG00000089567	TRUE	TRUE	MZT mRNA interactome	FALSE	FALSE	FALSE	FALSE	TRUE
E7F5D8		si:ch211-189e2.3	ENSDARG00000089954	FALSE	TRUE	MZT mRNA interactome	no homolog	no homolog	no homolog	FALSE
F1QWP0;Q7ZUX2	cstf2	cstf2	ENSDARG00000090788	FALSE	TRUE	MZT mRNA interactome	TRUE	TRUE	TRUE	FALSE	TRUE
E9QIZ1;E7EXJ3	si:ch211-197h24.6	si:ch211-197h24.6	ENSDARG00000091631	FALSE	TRUE	MZT mRNA interactome	no homolog	no homolog	no homolog	FALSE
Q802C9;A5WVT8;Q7ZU67;F1R166	eif4a1a;eif4a1b;eif4a2	eif4a1a	ENSDARG00000092115	TRUE	TRUE	MZT mRNA interactome	TRUE	TRUE	TRUE	FALSE	TRUE
E9QF21;E9QEZ5	mrpl34	mrpl34	ENSDARG00000092954	FALSE	TRUE	MZT mRNA interactome	FALSE	FALSE	FALSE	FALSE	FALSE
Q7ZV05;A9C3W5	rps11;si:dkey-159f12.2	RPS11 (2 of 2)	ENSDARG00000093606	TRUE	TRUE	MZT mRNA interactome	TRUE	TRUE	FALSE	FALSE	TRUE
Q7ZVK5	pcbp2	pcbp2	ENSDARG00000099039	TRUE	TRUE	MZT mRNA interactome	TRUE	TRUE	TRUE	TRUE	TRUE
E7FFV0	pum1	pum1	ENSDARG00000099256	TRUE	TRUE	MZT mRNA interactome	TRUE	TRUE	TRUE	TRUE	TRUE
E7FFD9	LOC100536140	POLDIP3	ENSDARG00000099375	FALSE	TRUE	MZT mRNA interactome	TRUE	TRUE	TRUE	FALSE	TRUE
F1QML8	akap8l	akap8l	ENSDARG00000099635	TRUE	TRUE	MZT mRNA interactome	FALSE	TRUE	TRUE	FALSE	TRUE
Q6NYA1	zgc:77052	hnrnpabb	ENSDARG00000099865	TRUE	TRUE	MZT mRNA interactome	TRUE	TRUE	TRUE	FALSE	TRUE
Q8JGS9;E9QJF2	rps18	rps18	ENSDARG00000100392	TRUE	TRUE	MZT mRNA interactome	TRUE	FALSE	TRUE	TRUE	TRUE
Q6P0B2	lsm14ab	lsm14ab	ENSDARG00000100553	TRUE	TRUE	MZT mRNA interactome	TRUE	TRUE	TRUE	FALSE	TRUE
Q6NZS4	zgc:76871	rtcb	ENSDARG00000101047	TRUE	TRUE	MZT mRNA interactome	TRUE	TRUE	TRUE	FALSE	TRUE
F1QF96;F1QYE1	r3hdm1	r3hdm1	ENSDARG00000101458	TRUE	TRUE	MZT mRNA interactome	TRUE	TRUE	TRUE	FALSE	TRUE
F1R0U5	larp1	larp1	ENSDARG00000101722	FALSE	TRUE	MZT mRNA interactome	TRUE	TRUE	TRUE	FALSE	TRUE
F1R331;F1QZT4	zgc:152816	si:ch211-271b14.1	ENSDARG00000101808	TRUE	TRUE	MZT mRNA interactome	FALSE	TRUE	TRUE	FALSE	TRUE
F1QG05	ptbp2a	ptbp2a	ENSDARG00000101947	TRUE	TRUE	MZT mRNA interactome	TRUE	TRUE	TRUE	TRUE	TRUE
F1QAR1;F1QH55	zc3h7a	zc3h7a	ENSDARG00000102195	FALSE	TRUE	MZT mRNA interactome	FALSE	TRUE	TRUE	FALSE	TRUE
Q6TLG8	rps3	rps3	ENSDARG00000103007	TRUE	TRUE	MZT mRNA interactome	TRUE	TRUE	TRUE	TRUE	TRUE
A8E526	rpl14	rpl14	ENSDARG00000103433	TRUE	TRUE	MZT mRNA interactome	TRUE	TRUE	TRUE	TRUE	TRUE
Q566W6	zgc:112425	cirbpa	ENSDARG00000103672	TRUE	TRUE	MZT mRNA interactome	TRUE	TRUE	TRUE	FALSE	TRUE
F1QIP2	zgc:55733	zgc:55733	ENSDARG00000103845	TRUE	TRUE	MZT mRNA interactome	TRUE	TRUE	TRUE	FALSE	TRUE
Q32LU7;F1QDD8	ptcd3	ptcd3	ENSDARG00000103856	TRUE	TRUE	MZT mRNA interactome	TRUE	TRUE	TRUE	TRUE	TRUE
Q6NXA4;F1Q6Y7	ilf3;ilf3b	ilf3b	ENSDARG00000105177	TRUE	TRUE	MZT mRNA interactome	TRUE	TRUE	TRUE	TRUE	TRUE
E7FBQ7	LOC100535593	NFX1		FALSE	TRUE	gene retired
A2BEG2	trmt2a	trmt2a	ENSDARG00000002830	TRUE	FALSE	MZT mRNA interactome	TRUE	TRUE	FALSE	FALSE	TRUE
A3KQN8	si:dkey-119o24.1	dhx36	ENSDARG00000101059	TRUE	FALSE	MZT mRNA interactome	FALSE	TRUE	TRUE	TRUE	TRUE
B8JIA4	whsc1	whsc1	ENSDARG00000026225	TRUE	FALSE	MZT mRNA interactome	FALSE	FALSE	FALSE	FALSE	FALSE
E7EZV4;A3KQR6;A8HAI7;A3KQR5;F1R0T1;F1QJD7	si:ch211-226h8.14;si:dkey-240e12.6;si:ch211-12h2.6;si:ch73-189n23.1	si:ch211-12h2.6	ENSDARG00000093841	TRUE	FALSE	MZT mRNA interactome	no homolog	no homolog	no homolog	FALSE
E7F3R2	CU467646.1	CU467646.1	ENSDARG00000075090	TRUE	FALSE	MZT mRNA interactome	no homolog	no homolog	no homolog	FALSE
E9QEK4;E7F889;E9QG76;F1Q718	mrpl45	mrpl45	ENSDARG00000044942	TRUE	FALSE	MZT mRNA interactome	FALSE	TRUE	TRUE	FALSE	FALSE
E7FAI6		CABZ01059627.2	ENSDARG00000079681	TRUE	FALSE	MZT mRNA interactome	no homolog	no homolog	no homolog	FALSE
F1QTC9;E9QIU2	alg13	alg13	ENSDARG00000054374	TRUE	FALSE	MZT mRNA interactome	FALSE	FALSE	TRUE	FALSE	TRUE
F1Q4Z8;F8W4V6	grsf1	grsf1	ENSDARG00000053021	TRUE	FALSE	MZT mRNA interactome	TRUE	TRUE	TRUE	FALSE	TRUE
F1Q7H6	nxf1	nxf1	ENSDARG00000055076	TRUE	FALSE	MZT mRNA interactome	TRUE	TRUE	TRUE	TRUE	TRUE
Q498Z6;F1QUB2	mrps7	mrps7	ENSDARG00000101622	TRUE	FALSE	MZT mRNA interactome	FALSE	TRUE	TRUE	TRUE	TRUE
Q4KM14;F1QXG2	trnau1apl;trnau1apb	C2H6orf52	ENSDARG00000056475	TRUE	FALSE	MZT mRNA interactome	no homolog	FALSE	FALSE	TRUE	TRUE
F1R0Y4;F1QLY3	fam98a	fam98a	ENSDARG00000078391	TRUE	FALSE	MZT mRNA interactome	FALSE	TRUE	TRUE	TRUE	TRUE
F1R3J9;F1QFJ1	prmt1	prmt1	ENSDARG00000010246	TRUE	FALSE	MZT mRNA interactome	FALSE	FALSE	TRUE	FALSE	TRUE
F8W4X6;Q90Z10	rpl13	rpl13	ENSDARG00000099380	TRUE	FALSE	MZT mRNA interactome	TRUE	TRUE	FALSE	TRUE	TRUE
P79735	ran	ran	ENSDARG00000057026	TRUE	FALSE	MZT mRNA interactome	FALSE	TRUE	TRUE	FALSE	TRUE
Q08ES4	btg4	btg4	ENSDARG00000035171	TRUE	FALSE	MZT mRNA interactome	FALSE	FALSE	FALSE	FALSE	FALSE
Q7SXD6;Q1L8V7	mrpl3	mrpl3	ENSDARG00000103318	TRUE	FALSE	MZT mRNA interactome	FALSE	TRUE	TRUE	FALSE	TRUE
Q5BJJ2	rpl3	rpl3	ENSDARG00000003599	TRUE	FALSE	MZT mRNA interactome	TRUE	TRUE	TRUE	TRUE	TRUE
Q6DBR0	rpusd4	rpusd4	ENSDARG00000012674	TRUE	FALSE	MZT mRNA interactome	FALSE	TRUE	TRUE	TRUE	TRUE
Q6P5M3;A3KQ06	rps9	rps9	ENSDARG00000011405	TRUE	FALSE	MZT mRNA interactome	FALSE	TRUE	FALSE	TRUE	TRUE
Q7SXA1	rpl26	rpl26	ENSDARG00000102317	TRUE	FALSE	MZT mRNA interactome	TRUE	FALSE	TRUE	TRUE	TRUE
Q9PW28	eif4e1b	eif4e1b	ENSDARG00000014565	TRUE	FALSE	MZT mRNA interactome	FALSE	FALSE	FALSE	TRUE	TRUE
Q6P5M9;Q6IQJ2;F1R6Y8;F1RBW2;F1QEH9	tubb4b	tubb4b	ENSDARG00000002344	FALSE	TRUE	MZT mRNA interactome	FALSE	FALSE	FALSE	FALSE	FALSE
Q6PI52	calm1a	calm1a	ENSDARG00000021811	FALSE	TRUE	MZT mRNA interactome	FALSE	FALSE	FALSE	FALSE	FALSE
Q5BJA5;Q05AK8;F1R4A4;B3DJF8;Q6PC60;F1RD54;F1R0S5;F1QKN7;F1QGY1;F1QF78;F1QAU0;G1K2T9;G1K2L0;F1RAY6;F1RAV8;F1QIH4;F1QG64;F1QAY4;F1QA71;F1Q9D0;E7FEC9;E7F459;E7F2U8;E7EXF4;G1K2M4;F1QGS7;G1K2V1;E9QHX5;E7EZA5	zgc:112234;zgc:171759;LOC570661;hist2h2l;wu:fe11b02;CABZ01086354.1;CR762436.3;zgc:173585;LOC100333437;CU302436.6	ano9a	ENSDARG00000078941	FALSE	TRUE	MZT mRNA interactome	FALSE	FALSE	FALSE	FALSE	FALSE
F1RER6;B8A516;Q6NWK7;B8A518;Q6NWJ5;E7F244;F1QJ32;F1R6T2;Q6PC95;E7EYT7;Q6DC49;F1QQ90;F1QCY2	tuba1b;tuba1a;tuba1c;tuba8l4;si:ch211-114n24.6;tuba8l2;si:ch73-199e17.1;tuba8l3	tuba1c	ENSDARG00000055216	TRUE	FALSE	MZT mRNA interactome	FALSE	TRUE	FALSE	FALSE	FALSE

## Sheet: ST4_MZT and mammalian mRBPomes
Supplemental Table S4. Comparison of the zebrafish MZT and mammalian mRNA-bound proteomes
	D.rerio	mESCs	HeLa	HEK293
D. rerio	227	145	171	171
mESCs		555	392	367
HeLa			860	559
HEK293				797

## Sheet: ST5_iCLIP statistics
Supplemental Table S5. PreZGA and ZGA iCLIP statistics
# Total number of mapped reads and significant CLIP tags (FDR<0.01) from summed Hnrnpa1 and IgG (negative control) replicate samples for the respective developmental stages are shown. The numbers of gene hits are indicated.
	preZGA	ZGA
Number of mapped reads (Hnrnpa11)	2236969	3518221
Number of CLIP tags (Hnrnpa11)	565148	467473
Number of CLIP tags (IgG)	9566	20230
Number of genes (Hnrnpa1) (>1 tag)	6809	6497
Number of genes (IgG) (>1 tag)	218	203

## Sheet: ST6_List of oligos
Supplemental Table S6. List of oligonucleotides
oligo name	oligo sequence (5'-3' direction)	experiment	description	protein
Pre-adenylated adapter L3-App	rAppAGATCGGAAGAGCGGTTCAG/ddC/	iCLIP
Rt1	/5Phos/NNAACCNNNAGATCGGAAGAGCGTCGTGgatcCTGAACCGC	iCLIP	preZGA and ZGA_rep1	Hnrnpa1
Rt2	/5Phos/NNACAANNNAGATCGGAAGAGCGTCGTGgatcCTGAACCGC	iCLIP	preZGA and ZGA_rep2	Hnrnpa1
Rt3	/5Phos/NNATTGNNNAGATCGGAAGAGCGTCGTGgatcCTGAACCGC	iCLIP	preZGA and ZGA_rep3	Hnrnpa1
Rt4	/5Phos/NNGACCNNNAGATCGGAAGAGCGTCGTGgatcCTGAACCGC	iCLIP	ZGA_rep4	Hnrnpa1
Rt5	/5Phos/NNCGCCNNNAGATCGGAAGAGCGTCGTGgatcCTGAACCGC	iCLIP	preZGA and ZGA_rep1	IgG
Rt6	/5Phos/NNCCGGNNNAGATCGGAAGAGCGTCGTGgatcCTGAACCGC	iCLIP	preZGA_rep2	IgG
Rt7	/5Phos/NNGCCANNNAGATCGGAAGAGCGTCGTGgatcCTGAACCGC	iCLIP	preZGA and ZGA_rep3	IgG
Rt8	/5Phos/NNGTGGNNNAGATCGGAAGAGCGTCGTGgatcCTGAACCGC	iCLIP	ZGA_rep2	IgG
Cut_oligo	GTTCAGGATCCACGACGCTCTTCaaaa	iCLIP
P5	AATGATACGGCGACCACCGAGATCTACACTCTTTCCCTACACGACGCTCTTCCGATCT	iCLIP
P3	CAAGCAGAAGACGGCATACGAGATCGGTCTCGGCATTCCTGCTGAACCGCTCTTCCGATCT	iCLIP
dre-pri-mir-430b_Fw	GACACTCCTTTGCA TCTTCCTC	RT-PCR	Validation of Hnrnpa1-mir-430 interaction (Fig.5)
dre-pri-mir-430b_Rv	TGGAACAGAATCGTGGTGGA	RT-PCR	Validation of Hnrnpa1-mir-430 interaction (Fig.5)
pri-mir-430_chr4_BamH_Fw	AAAAGGATCCTGTTTACTGGTTTTGCACCTGGA	molecular cloning	HeLa cell experiment (Fig.5)
pri-mir-430_chr4_XhoI_Rv	AAAACTCGAGGTTGAAAGTGATGGGATTTTTCAC	molecular cloning	HeLa cell experiment (Fig.5)
pSUPER-empty_Fw	/5Phos/AATGAGATCTGTGGTCTCATACAGAACTTATAAG	molecular cloning	HeLa cell experiment (Fig.5)
pSUPER-empty_Rv	/5Phos/ATCAAAGCTTATCGATACCGTCGACC	molecular cloning	HeLa cell experiment (Fig.5)
gfp_shRNA_1	/5Phos/GATCTCCCCGCAAGCTGACCCTGAAGTTCTTCAAGAGAGAACTTCAGGGTCAGCTTGCTTTTTTA	molecular cloning	HeLa cell experiment (Fig.5)
gfp_shRNA_2	/5Phos/AGCTTAAAAAAGCAAGCTGACCCTGAAGTTCTCTCTTGAAGAACTTCAGGGTCAGCTTGCGGGGA	molecular cloning	HeLa cell experiment (Fig.5)
pri-mir-430 b_Fw	CAACAAGTTGGAGTAACATGG	RT-PCR	HeLa cell experiment (Fig.5)
pri-mir-430 b_Rv	TACAAAAAGAACAGAATCTTGGTGG	RT-PCR	HeLa cell experiment (Fig.5)
ndufa2_Fw	AAGACCTGGAATTGGCGACT	RT-PCR	HeLa cell experiment (Fig.5)
ndufa2_Rv	AGAGCTTGGGCTGCACAT	RT-PCR	HeLa cell experiment (Fig.5)
mir-430 b probe	/5Biotin/CTACCCCAACTTGATAGCACTT	Northern blot	HeLa cell experiment (Fig.5)
U6 snRNA probe	/5Biotin/GCAGGGGCCATGCTAATCTTCTCTGTATCG	Northern blot	HeLa cell experiment (Fig.5)
npc1_ClaI_Fw	AAAAATCGATCGACGCCAGCTTTTCATATT	molecular cloning	3'UTR cloning (Fig.2)
npc1_XbaI_Rv	AAAATCTAGACAAATTAGTCCGTATTTATTCCAAAA	molecular cloning	3'UTR cloning (Fig.2)
Rluc_BamHI_Fw	TTTTGGATCCGCCGCCACCATGACTTCGAAAGTTTATGATCCAG	molecular cloning	(Fig.2)
Rluc_HA_XbaI_Rv	TTTTTCTAGATTAAGCATAATCTGGAACATCATATGGATATTGTTCATTTTTGAGAACTCGCT	molecular cloning	(Fig.2)
mknk1_Fw	CCTCGGGGTCATTCTCTACA	RT-qPCR	(Fig.4)
mknk1_Rv	GAACGACATGTTTCTCCTCGT	RT-qPCR	(Fig.4)
ciarta_Fw	TAGGAAGACCACCTCCGCTT	RT-qPCR	(Supplemental_Fig. S4)
ciarta_Rv	GTGGGAGTTGTGGATGACACT	RT-qPCR	(Supplemental_Fig. S4)
tmem102_Fw	TGGCTCACTGTATTCTGGGC	RT-qPCR	(Fig.4 & Supplemental_Fig. S4)
tmem102_Rv	TTCCGTGCAACTAACAGGGC	RT-qPCR	(Fig.4 & Supplemental_Fig. S4)
tmem251_Fw	CCGACTTGCATTGGCACAAG	RT-qPCR	(Fig.4 & Supplemental_Fig. S4)
tmem251_Rv	TCCATGAGGTTGAAGAAGGGG	RT-qPCR	(Fig.4 & Supplemental_Fig. S4)
emc1_Fw	CCAGACTAGAGTGTTCCCTTCC	RT-qPCR	(Fig.4 & Supplemental_Fig. S4)
emc1_Rv	GGTGGCAAAGAAGAGACCGA	RT-qPCR	(Fig.4 & Supplemental_Fig. S4)
gstm_Fw	CAACAAGATGGCCAAATGGGG	RT-qPCR	(Supplemental_Fig. S4)
gstm_Rv	ACTGCTGGTCTAATGAAATGTTTT	RT-qPCR	(Supplemental_Fig. S4)
suv39h1a_Fw	ATTTAGACTTCAGTCGAGCTGGG	RT-qPCR	(Supplemental_Fig. S4)
suv39h1a_Rv	ATTTCCGGCAGTTCCTCACA	RT-qPCR	(Supplemental_Fig. S4)
hnrnpa1a MO	CTGTTGCTCTTTGGACATGGCGGTC	antibody validation	(Supplemental_Fig. S2)
hnrnpa1b MO	GGCCCTCTTTGGACATCCTACCGAC	antibody validation	(Supplemental_Fig. S2)
Scrambled hnrnpa1a Ctrl MO	CTATTACTCTTTAGACATGACGATC	antibody validation	(Supplemental_Fig. S2)
Scrambled hnrnpa1b Ctrl MO	GACCCTATTTGAACATCATACCAAC	antibody validation	(Supplemental_Fig. S2)
egfp_Fw	TCGTGACCACCCTGACCTAC	RT-qPCR	(Fig.2 & Supplemental_Fig.S3)
egfp_Rv	GCGGACTTGAAGAAGTCGTG	RT-qPCR	(Fig.2 & Supplemental_Fig.S3)
Rluc-HA_Fw	AAGGTGGTAAACCTGACGTTG	RT-qPCR	(Fig.2 & Supplemental_Fig.S3)
Rluc-HA_Rv	AAAGAATCCTGGGTCCGATT	RT-qPCR	(Fig.2 & Supplemental_Fig.S3)
npc1_mut1_Fw	[Phos]CTGTGCTAGCATTAGTTTAGTGACTTA	molecular cloning	(Fig.2)
npc1_mut1_Rv	[Phos]GGTTTATTAGCATGTCTATGCTAATTAAC	molecular cloning	(Fig.2)
npc1_mut2_Fw	[Phos]CTCTGAAAACTTGGACATTTATGT	molecular cloning	(Fig.2)
npc1_mut2_Rv	[Phos]GGAGACTAATGACAAACATTACTTTG	molecular cloning	(Fig.2)
ePAT_anchor	GCGAGCTCCGCGGCCGCGTTTTTTTTTTTT	ePAT assay	(Fig.2 & Supplemental_Fig.S3)
ePAT_eGFP_Fw	CATGGTCCTGCTGGAGTTCGTGACCG	ePAT assay	(Fig.2 & Supplemental_Fig.S3)
ePAT_npc1_A0_Rv	GTGGGTATGATGTGATTTTTCAAAG	ePAT assay	(Fig.2 & Supplemental_Fig.S3)
		ePAT assay	(Fig.2 & Supplemental_Fig.S3)
